# Supplementary material for: The 2014 coral bleaching and freshwater flood events in Kāneʻohe Bay, Hawaiʻi
Source: PeerJ. 2015 Aug 4;3:e1136. doi: 10.7717/peerj.1136 (PMC4540025; doi:10.7717/peerj.1136)
Supplement: Supplemental Information 1 — Raw data for bleaching and freshwater analyses. [file peerj-03-1136-s001.xlsx]

## Sheet: October
Site/reef	GPS_point	Lat	Long		TTC	Pale	Bleached	Dead			Average																Proportion of surveyed corals	14 October 2014: Bleaching				1 December 2014: Recovery
HIMB Channel		21.4329	-157.787		80	80	20	0																				Impacted	Non-Impacted	Overall		Impacted	Non-Impacted	Overall
Point reef	104	21.434	157.786	-157.786	80	80	20	0			Oct	Mean	SD	SE													Total Coral Cover	49.4	61	59.6		53.6	54.9	63.2
Point reef	105	21.4349	157.786	-157.786	80	80	20	0			TCC	60	30	0.03													Normal	1.6	32.6	27.4		33.1	90.2	82.4
Red Nun		21.4366	157.787	-157.787	80	20	60	0			Pale	23	26	2.2													Pale	26.5	22.7	23		4.1	6.3	6
Barrier reef		21.4426	157.786	-157.786	90	20	80	0			Bleached	45	23	1.9													Bleached	49.4	44.7	45.3		2.8	2.6	2.6
Barrier reef	106	21.4446	157.784	-157.784	80	10	40	0			Dead	4	17	1													Dead	22.5	0	4.3		60	0.9	9
Barrier reef	107	21.4457	157.784	-157.784	80	10	40	0			total	72
Barrier reef	108	21.448	157.783	-157.783	80	5	30	0
Crashboat	110	21.4494	157.782	-157.782	80	0	20	0
Crashboat	111	21.4513	157.783	-157.783	80	5	30	0			Section	TCC	SD	Pale		Bleach		Dead		Total percent of P,B,D	Normal		Pale and bleached
Crashboat	112	21.4535	157.784	-157.784	80	5	30	0			North	55	27	19.36	22.42	53.72	27.36	15.89	28.7	88.97	11.03		73.08
Kekepa	113	21.4603	157.779	-157.779	5	100	0	0			Center	66.46	26.83	16.72	16.57	46	16.76	0	0	62.72	37.28		62.72
Kapapa	114	21.4685	157.793	-157.793	5	100	0	0			South	71.14	23.5	30.45	29.6	39.3	20	0	0	69.75	30.25		69.75
Kapapa	115	21.4688	157.794	-157.794	5	100	0	0			Barrier	30.26	35.15	42.1	40.5	30	24.9	0	0	72.1	27.9		72.1
Kapapa	116	21.4752	157.8	-157.8	5	100	0	0
Kapapa	117	21.476	157.799	-157.799	5	90	10	0
Kapapa	118	21.4752	157.8	-157.8	5	80	10	0			Inside FW area
Kapapa	119	21.4746	157.801	-157.801	5	60	30	0				TCC	SD	Pale		Bleach		Dead		Total percent of P,B,D	Normal		Pale and bleached
Kapapa	120	21.4758	157.802	-157.802	10	60	40	0			Oct	49.35	24.8	26.5	26.5	49.4	28.17	22.5	34.8	98.4	1.6		75.9
Kapapa	121	21.4739	157.805	-157.805	5	5	40	0			Dec	53.6	26.7	4.14	3	2.78	2	59.9	26.2	66.82	23.14	25.3	6.92
Ahu O Laka	122	21.4746	157.806	-157.806	5	5	80	0
Ahu O Laka	123	21.4756	157.807	-157.807	5	5	80	0			Outside FW area
Ahu O Laka	124	21.4761	157.815	-157.815	5	20	60	0				TCC	SD	Pale		Bleach		Dead		Total percent of P,B,D	Normal
Ahu O Laka	125	21.4758	157.82	-157.82	20	5	50	0			Oct	60.59	30.93	22.69	26.14	44.7	22.13	0		67.39	32.61		67.39
Ahu O Laka	126	21.4756	157.822	-157.822	90	5	10	0			Dec	54.9	26.3	6.29	11.97	2.58	5.9	0.92	3.6		90.23	18.1	8.87
PR 41	127	21.4754	157.823	-157.823	80	5	50	0
PR 41	128	21.4747	157.824	-157.824	80	10	90	0
PR 40	129	21.4737	157.823	-157.823	80	0	80	0
PR 39	130	21.4747	157.827	-157.827	80	5	80	0
PR38	131	21.4732	157.829	-157.829	50	5	80	0
PR 33	132	21.472	157.83	-157.83	10	5	90	0
PR 42	133	21.4769	157.825	-157.825	80	5	50	0
PR 42	134	21.4772	157.826	-157.826	80	0	20	0
PR 43	135	21.4772	157.826	-157.826	80	0	50	0
PR 44	136	21.4775	157.831	-157.831	80	5	30	0
PR 46	137	21.4798	157.833	-157.833	40	5	50	40
PR 46	138	21.4794	157.834	-157.834	60	30	10	50
PR 46	139	21.4791	157.834	-157.834	30	10	50	70
PR 37	140	21.4787	157.835	-157.835	30	50	30	80
PR 48	141	21.4809	157.834	-157.834	10	100	0	90
PR 47	142	21.4817	157.831	-157.831	80	5	5	0
PR 47	143	21.4811	157.832	-157.832	20	5	80	0
PR 47	144	21.4812	157.833	-157.833	80	5	20	0
PR 49	145	21.4828	157.832	-157.832	80	5	10	0
FR	147	21.4829	157.837	-157.837	80	5	40	0
FR	148	21.4821	157.837	-157.837	80	10	80	0
FR	149	21.4817	157.836	-157.836	80	0	50	0
FR	150	21.4812	157.835	-157.835	40	30	70	40
FR	151	21.4792	157.836	-157.836	50	50	50	50
FR	152	21.4777	157.836	-157.836	20	50	50	80
FR	153	21.4759	157.839	-157.839	20	50	50	80
FR	154	21.4762	157.838	-157.838	20	0	100	40
FR	155	21.4759	157.836	-157.836	80	5	20	0
FR	156	21.4757	157.834	-157.834	50	20	80	0
34/36	157	21.4744	157.833	-157.833	60	10	90	0
FR	158	21.4711	157.834	-157.834	30	50	50	0
FR	159	21.4702	157.832	-157.832	40	50	50	0
PR 33	160	21.4712	157.829	-157.829	20	50	50	0
PR 33 edge	161	21.4712	157.83	-157.83	80	50	50	0
PR 32	162	21.4721	157.826	-157.826	80	10	30	0
PR 31	163	21.4715	157.826	-157.826	20	0	90	0
PR 31 edge	164	21.4708	157.826	-157.826	80	20	40	0
FR	165	21.4686	157.829	-157.829	80	10	90	0
FR	166	21.4665	157.828	-157.828	80	30	70	0
FR	167	21.4638	157.829	-157.829	80	50	50	0
FR	168	21.4615	157.827	-157.827	80	60	40	0
FR	169	21.4568	157.825	-157.825	80	70	30	0
FR	170	21.4553	157.824	-157.824	80	70	30	0
FR	171	21.4553	157.821	-157.821	80	20	80	0
FR	172	21.4558	157.818	-157.818	80	10	30	0
FR	173	21.4565	157.815	-157.815	80	10	30	0
FR	174	21.4537	157.814	-157.814	80	10	40	0
FR	175	21.4509	157.813	-157.813	80	30	40	0
FR	176	21.4515	157.811	-157.811	80	20	40	0
PR 18 E	177	21.4512	157.811	-157.811	80	5	40	0
PR 18 F	178	21.45	157.813	-157.813	20	20	80	0
FR	179	21.4486	157.81	-157.81	80	50	50	0
PR 17F	180	21.448	157.81	-157.81	5	10	50	0
PR 17E	181	21.445	157.809	-157.809	80	5	50	0
FR	182	21.4464	157.807	-157.807	80	10	50	0
PR 10E	183	21.4469	157.804	-157.804	80	5	50	0
PR 10F	184	21.447	157.804	-157.804	20	5	40	0
PR 10E	185	21.446	157.804	-157.804	80	10	80	0
PR 9E	186	21.4472	157.801	-157.801	80	10	50	0
PR9F	187	21.4462	157.801	-157.801	80	5	50	0
PR 9E	188	21.4457	157.802	-157.802	80	0	10	0
FR	189	21.4425	157.806	-157.806	80	25	50	0
PR 6	190	21.4402	157.805	-157.805	80	25	50	0
PR 6	191	21.4401	157.805	-157.805	40	10	30	0
PR 6	192	21.4401	157.805	-157.805	80	50	50	0
FR	193	21.4386	157.803	-157.803	80	30	40	0
PB 5	194	21.4393	157.8	-157.8	80	20	60	0
FR	195	21.436	157.802	-157.802	80	10	80	0
PR 5 F	196	21.4365	157.799	-157.799	30	20	30	0
PR 5 E	197	21.4367	157.799	-157.799	75	10	40	0
PR 4 F	198	21.4358	157.798	-157.798	20	5	50	0
PR 4 E	199	21.4358	157.798	-157.798	80	0	80	0
FR	200	21.4318	157.803	-157.803	80	10	50	0
FR	201	21.4307	157.801	-157.801	80	10	50	0
FR	202	21.4294	157.798	-157.798	80	10	50	0
FR	203	21.4299	157.795	-157.795	75	20	40	0
Lilipuna FR	204	21.4299	157.793	-157.793	80	50	50	0
HIMB Lagoon	205	21.4325	157.79	-157.79	30	50	50	0
HIMB	206	21.4305	157.79	-157.79	80	20	40	0
HIMB	207	21.4301	157.788	-157.788	80	20	40	0
HIMB	208	21.4318	157.787	-157.787	80	10	70	0
FR	209	21.4283	157.79	-157.79	80	20	80	0
FR	210	21.4149	157.78	-157.78	5	95	0	0
FR	211	21.4155	157.777	-157.777	5	50	30	0
FR	212	21.4171	157.773	-157.773	80	40	40	0
FR	213	21.4193	157.773	-157.773	80	5	25	0
FR	214	21.4227	157.771	-157.771	80	0	50	0
FR	215	21.4263	157.77	-157.77	80	5	40	0
FR	216	21.4289	157.768	-157.768	75	0	20	0
PR 8	217	21.4439	157.792	-157.792	80	10	20	0
PR 11	218	21.4489	157.795	-157.795	80	5	10	0
PR 12	219	21.4505	157.797	-157.797	80	1	40	0
PR 14	220	21.4524	157.801	-157.801	80	5	40	0
PR 15	221	21.4536	157.803	-157.803	80	10	50	0
PR 16	222	21.4545	157.804	-157.804	80	10	40	0
PR 19	223	21.4577	157.807	-157.807	80	1	30	0
PR 20	224	21.4607	157.81	-157.81	70	5	30	0
PR 22	225	21.4607	157.813	-157.813	80	5	30	0
PR 23	226	21.4616	157.814	-157.814	80	10	30	0
PR 21	227	21.4631	157.812	-157.812	80	10	40	0
PR 24	228	21.4618	157.816	-157.816	80	10	40	0
PR 25	229	21.461	157.822	-157.822	80	5	80	0
PR 25F	230	21.4609	157.822	-157.822	5	45	45	0
PR 26	231	21.4658	157.819	-157.819	80	10	70	0
PR 26 F	232	21.4657	157.819	-157.819	5	20	70	0
PR 26E	233	21.4658	157.82	-157.82	80	5	30	0
PR 27F	234	21.4674	157.822	-157.822	10	20	50	0
PR 27E	235	21.4673	157.822	-157.822	80	10	50	0
PR 29 E	236	21.471	157.82	-157.82	80	30	70	0
PR 29 F	237	21.4707	157.82	-157.82	5	40	50	0
PR 28 E	238	21.4694	157.82	-157.82	80	30	70	0
PR 28 F	239	21.469	157.82	-157.82	5	10	50	0
PR 30 E	240	21.4712	157.823	-157.823	80	10	90	0
PR 30 F	241	21.4712	157.823	-157.823	5	25	50	0
BR	242	21.472	157.819	-157.819	80	50	50	0
PR 8	243	21.462	157.81	-157.81	80	5	50	0
PR 3	244	21.4377	157.792	-157.792	80	0	25	0
PR 2E	245	21.4334	157.794	-157.794	80	5	25	0
PR 2F	246	21.4333	157.795	-157.795	15	0	25	0

## Sheet: December
Site/reef	GPS_point	Lat	Long	Normal	Pale	Bleached	Dead	Total_Cover
HIIMB Channel	248	21.4329	-157.787	95	5	0	1	80			Section	TCC	SD	Pale	SD	Bleach	SD	Dead	SD	Total percent of P,B,D	Normal
Point Reef	250	21.4333	-157.786	100	0	0	0	80			North	59.5	25.5	1.83	2.45	1.1	1.64	22.3	35.9	25.23	74.77
Point Reef	251	21.4335	-157.786	100	1	0	0	80			Center	76.2	11.9	6.3	12.9	2.14	4.14	2.76	11.7	11.2	88.8
Red Nun	252	21.4366	-157.787	95	0	0	5	80			South	58.8	11.81	6.17	8.07	2.12	4.85	0.35	1.2	8.64	91.36
MCBH	253	21.4426	-157.786	98	1	1	0	80			Barrier	25.83	31.35	17.25	16	8.3	11.1	1.25	2.2	26.8	73.2
MCBH	254	21.4444	-157.784	99	1	0	0	80
Red Triangle	255	21.4495	-157.782	99	1	0	0	80
Crash Boat	256	21.4507	-157.782	100	0	0	0	80
Crash Boat	257	21.4526	-157.784	99	1	0	0	80
PR 8	258	21.4459	-157.794	97	1	1	1	80
PR 8	259	21.4448	-157.797	98	0	1	1	80
PR 11	260	21.449	-157.795	90	0	5	5	80
PR 13	261	21.4507	-157.795	85	5	5	5	80
PR 12	262	21.451	-157.797	93	1	1	5	80
PR 14	263	21.4534	-157.801	98	1	1	0	80
PR 14	264	21.4531	-157.802	98	1	1	0	80
PR 15	265	21.4538	-157.803	99	0	1	0	80
PR 15	266	21.4537	-157.803	93	1	1	5	80
PR 15	267	21.4536	-157.804	97	1	1	0	80
PR 16	268	21.4549	-157.804	98	0	1	1	80
PR 19	269	21.4578	-157.807	100	0	0	0	80
PR 20	270	21.4608	-157.81	100	0	0	0	80
PR 22	271	21.4608	-157.814	99	1	0	0	80
PR 23	272	21.4616	-157.814	99	1	0	0	80
PR 24	273	21.4623	-157.816	100	0	0	0	80
PR 21	274	21.4631	-157.812	99	1	0	0	80
PR 26	275	21.4661	-157.818	98	1	1	0	80
PR 27	276	21.4677	-157.822	99	1	0	0	80
PR 27	277	21.4673	-157.823	99	0	1	0	80
PR 28	278	21.4688	-157.82	100	0	0	0	80
PR 28	279	21.4684	-157.82	100	0	0	0	80
PR 29	280	21.4702	-157.819	99	1	0	0	80
PR 30	282	21.4716	-157.824	99	0	1	0	80
PR 30	283	21.4711	-157.824	99	0	1	0	80
PR 31	284	21.4709	-157.825	99	1	0	0	80
PR 31	285	21.4706	-157.826	99	1	0	0	80
PR 32	286	21.4718	-157.826	100	0	0	0	80
PR 33	287	21.472	-157.829	99	1	0	0	10
PR 33	288	21.4714	-157.83	100	0	0	0	10
PR 38	289	21.473	-157.829	100	0	0	0	50
PR 38	290	21.473	-157.829	97	3	0	0	50
PR 38	291	21.4741	-157.827	99	1	0	0	50
PR 39	292	21.4733	-157.823	99	1	0	0	80
PR 40	293	21.475	-157.823	98	1	1	0	80
PR 41	294	21.476	-157.822	97	2	1	0	80
BR	295	21.4779	-157.824	100	0	0	0	80
PR 42	296	21.4779	-157.825	99	1	0	0	80
PR 43	297	21.4772	-157.826	99	2	0	0	80
PR T	298	21.4754	-157.83	99	1	0	0	80
PR 44	299	21.478	-157.831	98	1	1	0	80
PR 44	300	21.4778	-157.832	93	1	5	1	80
PR 46	301	21.4796	-157.833	95	1	3	1	40
PR 46	302	21.479	-157.834	88	1	1	10	60
PR 37	303	21.4788	-157.835	14	5	1	80	30
PR 48	304	21.4811	-157.834	15	3	2	80	10
PR 47	305	21.4821	-157.832	90	10	0	0	80
PR 47	306	21.4818	-157.833	100	0	0	0	80
PR 49	307	21.4832	-157.832	100	0	0	0	80
FR	308	21.4809	-157.835	10	0	0	90	80
FR	309	21.4804	-157.835	40	5	5	50	80
FR	310	21.4803	-157.835	6	2	2	90	80
FR	311	21.4783	-157.836	6	2	2	90	40
FR	312	21.4782	-157.836	20	0	0	80	50
FR	313	21.4758	-157.834	10	5	5	80	20
FR	314	21.4753	-157.834	10	10	1	79	20
FR	315	21.4705	-157.832	10	5	5	80	20
FR	316	21.47	-157.832	10	5	5	80	80
FR	317	21.4666	-157.828	10	5	5	80	50
FR	318	21.4662	-157.828	75	10	5	10	80
FR	319	21.4567	-157.825	25	25	25	25	80
FR	320	21.4561	-157.825	25	25	25	25	80
PR 25	321	21.4604	-157.822	90	5	5	0	80
PR 25	322	21.4601	-157.823	90	5	5	0	80
FR	323	21.4561	-157.815	90	5	5	0	50
FR	324	21.4561	-157.815	90	5	5	0	50
PR 18	325	21.4518	-157.811	90	5	5	0	80
PR 18	326	21.4514	-157.812	100	0	0	0	20
PR 17	327	21.4485	-157.809	95	5	0	0	40
PR 17	328	21.4483	-157.81	99	1	0	0	80
FR	329	21.4479	-157.81	95	5	0	0	80
FR Heeia	330	21.4464	-157.808	95	5	0	0	80
PR 10	331	21.4472	-157.804	100	0	0	0	80
PR 9	332	21.4473	-157.801	100	0	0	0	80
PR 7	333	21.4441	-157.8	95	5	0	0	80
PR 6	334	21.4404	-157.805	95	5	0	0	80
FR	335	21.4394	-157.804	90	10	0	0	80
PR 5	336	21.4384	-157.801	99	1	0	0	80
PR 5	337	21.4379	-157.797	100	0	0	0	80
PR 4	338	21.4358	-157.798	95	5	0	0	80
PR 3	340	21.4375	-157.794	98	1	1	0	80
PR 2	341	21.4335	-157.794	100	0	0	0	80
Lilipuna FR	342	21.43	-157.792	95	5	0	0	80
Lilipuna FR	343	21.4298	-157.791	98	2	0	0	80
HIMB Lagoon	344	21.4324	-157.79	95	5	0	0	80
HIMB FR	345	21.4307	-157.79	95	5	0	0	80
HIMB FR	346	21.4299	-157.788	100	0	0	0	80
FR South	347	21.4149	-157.78	60	20	20	0	20
FR South	348	21.4156	-157.777	85	10	5	0	20
FR South	349	21.4203	-157.772	65	30	5	0	20
FR South	350	21.4232	-157.771	80	15	5	0	20
FR South	351	21.4264	-157.77	95	5	0	0	20
FR South	352	21.4297	-157.768	100	0	0	0	20
Kepapa	353	21.461	-157.78	50	45	5	0	10
BR	354	21.4675	-157.794	100	0	0	0	5
BR	355	21.4675	-157.795	100	0	0	0	5
Kapapa	356	21.4734	-157.8	45	30	25	0	5
Kapapa	357	21.4734	-157.8	40	30	30	0	5
Kapapa	358	21.4738	-157.8	40	30	25	5	10
Kapapa	359	21.4733	-157.804	90	10	0	0	10
BR	360	21.4741	-157.807	60	30	5	5	10
BR	361	21.474	-157.807	55	30	10	5	10
SandBar	362	21.4737	-157.82	100	0	0	0	10
SandBar	363	21.4736	-157.82	100	0	0	0	80
SandBar	364	21.4749	-157.82	100	0	0	0	50
SandBar	365	21.4756	-157.822	97	1	1	1	50
SandBar	366	21.4757	-157.822	98	1	1	0	50
FR	367	21.4339	-157.803	40	50	10	0	80
FR	368	21.4311	-157.802	40	50	10	0	80
FR	369	21.4293	-157.799	45	50	5	0	80
FR	370	21.4299	-157.796	60	40	0	0	80

## Sheet: Weather
Date	Max Temp (C)	Max Temp Time	Min Temp (C)	Min Temp Time	Avg Temp (C)	Avg Wind Speed (mph)	Max Wind Gust (mph)	Max Gust Dir	Time Of Max Gust	Daily Rainfall (In)	Yearly Rainfall (In)	Total Solar (cal/cm2)	Total Quantum (E/m2)	Max Water Temp	Min Water Temp	Avg Water Temp									*** Daily weather
2014-07-01	26.6	1256	24.7	634	25.8	11.01	18.41	67	628	0	---	478	38	27.8	26.7	27.25
2014-07-02	26.6	1126	25.4	8	26	12.04	19.25	47	33	0	---	453	36	27.6	26.9	27.25
2014-07-03	26.7	1220	24.4	357	25.9	13.55	22.58	52	1831	0.08	---	481	38	27.8	26	26.9
2014-07-04	26.7	1454	25.3	448	26.1	13.65	22.45	13	1609	0	---	420	33	27.7	25.6	26.65
2014-07-05	26.2	1243	23.1	651	25.2	11.28	25.56	43	1730	0.11	---	384	31	27.7	25.4	26.55
2014-07-06	26.5	1219	23.6	158	25.6	12.44	22.95	85	31	0.09	---	478	37	27.7	25.4	26.55
2014-07-07	26.3	1359	22.7	413	25.4	10.95	24.57	65	118	0.04	---	242	22	27.2	26.1	26.65
2014-07-08	26.2	1028	24.5	2335	25.6	12.74	21.59	26	1314	0	---	363	30	27.4	25.8	26.6
2014-07-09	26.6	1415	23	524	25.5	12.09	23.5	55	1222	0	---	386	31	27.5	25.7	26.6
2014-07-10	26.7	1221	23.6	2358	25.9	13.43	26.28	59	2315	0.04	---	462	37	27.4	26	26.7
2014-07-11	26.9	852	23.2	611	25.8	13.12	28.28	55	523	0.01	---	264	23	27.1	25.7	26.4
2014-07-12	26.7	1305	23.7	2002	25.7	11.2	22.29	72	1955	0.02	---	399	32	27.3	25.8	26.55
2014-07-13	26.8	1414	25.2	2006	26.1	10.11	20.28	60	2001	0.01	---	401	33	27.5	26.4	26.95
2014-07-14	26.7	1840	24.8	144	26.1	12.42	22.6	47	1254	0.1	---	334	29	27.6	26.6	27.1
2014-07-15	26.6	1619	24.7	2136	26	10.88	19.75	23	1724	0.03	---	498	40	27.7	26.1	26.9
2014-07-16	26.6	1012	24.6	158	26.1	13.42	24.05	61	153	0.05	---	464	37	27.9	26.3	27.1
2014-07-17	26.5	1355	22.8	842	25.5	14.23	27.44	45	838	0.07	---	250	23	27.2	25.6	26.4
2014-07-18	26.4	1438	24	136	25.8	12.83	21.22	50	232	0.02	---	402	33	27.3	25.2	26.25
2014-07-19	26.6	1452	23.6	2336	25.7	11.66	22.82	50	2108	2.04	---	430	35	27.3	25.8	26.55
2014-07-20	26.4	1424	22.1	451	25	12.46	29.94	36	333	3.48	---	317	28	26.8	26.1	26.45
2014-07-21	27.3	1432	25	419	26.3	9.95	19.38	66	316	0.07	---	433	35	27.7	26.3	27
2014-07-22	27.1	1032	24.7	457	26.1	9.18	20.82	47	1532	0.34	---	317	28	27.9	26.9	27.4
2014-07-23	27	1108	25.4	1942	26.2	14.22	25.19	37	1936	0	---	446	36	27.8	26.4	27.1
2014-07-24	26.5	1453	25.4	314	25.9	13.49	23.43	35	846	0	---	403	33	28	25.8	26.9
2014-07-25	26.5	1330	24.6	837	25.8	11.19	20.5	43	834	0	---	395	33	27.5	25.8	26.65
2014-07-26	26.9	1327	24.8	1952	26.1	9.79	18.41	77	2355	0	---	482	38	27.7	26.4	27.05
2014-07-27	27.4	1346	26.1	443	26.7	12.64	19.71	77	1	0	---	517	41	28	27.1	27.55
2014-07-28	27.2	1506	25.6	510	26.4	10.88	18.57	26	1430	0	---	362	33	28	26.1	27.05
2014-07-29	26.9	1013	25.5	544	26.2	10.8	18.7	78	1429	0	---	469	42	28	26.7	27.35
2014-07-30	26.8	1149	25.4	557	26.1	11.56	19.79	26	1604	0	---	445	40	27.9	26.3	27.1
2014-07-31	27	1539	25.5	536	26.3	11.69	22.27	45	1922	0	---	451	41	28	26.4	27.2
2014-08-01	27.2	1106	25.5	2110	26.4	12.45	22.18	59	1950	0	---	355	34	28	26.8	27.4
2014-08-02	27.2	1307	24.9	341	26.5	11.21	23.13	72	336	0.09	---	330	33	28	27	27.5
2014-08-03	27.4	1509	25.9	511	26.6	12.25	19.77	70	835	0	---	433	40	28.1	27.2	27.65
2014-08-04	27.4	1347	25.4	240	26.6	14.45	22.62	65	2110	0	---	450	42	28.1	26.5	27.3
2014-08-05	27.1	1155	25.9	624	26.5	14.15	21.99	35	1724	0	---	449	41	28.1	26.5	27.3
2014-08-06	26.9	1513	24.5	139	26.1	12.87	23.48	83	608	0.01	---	382	36	28	26.4	27.2
2014-08-07	27.2	2317	24	236	26.2	14.24	23.76	18	2101	0.16	---	331	33	27.6	25.9	26.75
2014-08-08	27.3	1242	23.3	922	26.5	19.61	36.54	77	937	0.25	---	223	24	27.5	26.6	27.05
2014-08-09	27.1	1212	25.7	341	26.5	11.63	20.1	80	42	0.07	---	229	24	27.4	26.5	26.95
2014-08-10	26.8	1555	24.8	2345	26.2	7.59	14.12	34	2	0.02	---	452	42	28	26.2	27.1
2014-08-11	27.9	809	23.5	604	26	4.78	14.07	337	1231	0	---	448	42	28.3	27	27.65
2014-08-12	28.4	724	23.8	2330	26	5.56	15.8	34	1808	0.22	---	302	30	28.5	27.5	28
2014-08-13	27.2	1419	23.8	18	26.2	9.8	18.92	76	2258	0.01	---	449	41	28.7	28	28.35
2014-08-14	27.2	1343	26	2334	26.5	11.62	19.11	68	913	0	---	436	40	28.4	27.1	27.75
2014-08-15	27	957	24.5	459	26.3	13.19	20.67	58	1101	0	---	420	39	28	26.8	27.4
2014-08-16	27	1219	23.9	232	26.4	13.3	24.66	60	228	0	---	319	31	27.9	26.1	27
2014-08-17	27	1453	24.2	1050	26.3	11.64	22.51	70	1255	0.02	---	234	24	27.8	25.9	26.85
2014-08-18	27.1	1210	25.6	447	26.4	11.76	23.34	34	1332	0	---	408	38	27.8	25.5	26.65
2014-08-19	26.8	1157	24.1	1804	26	10.14	24.35	30	1027	0.07	---	370	35	28.1	25.7	26.9
2014-08-20	27.1	1526	25.7	540	26.4	9.61	18.79	48	2059	0	---	374	35	28	26	27
2014-08-21	26.9	1724	24.5	1502	26.1	10.62	20.6	53	1146	0.08	---	183	20	27.6	26.9	27.25
2014-08-22	27	1544	24.4	737	26.2	13.44	23.74	11	1426	0.01	---	238	24	27.4	25.5	26.45
2014-08-23	27.5	1046	24.9	333	26.3	12.02	22.18	29	937	0	---	401	37	27.8	25.6	26.7
2014-08-24	27.3	1424	23.3	430	25.9	7.63	21.31	95	1028	0.14	---	398	37	28.2	26.2	27.2
2014-08-25	27.3	1158	23.7	2317	26.2	11.56	24.2	58	2254	0.18	---	350	33	27.7	26.4	27.05
2014-08-26	27	1445	23.1	751	25.7	8.76	23.3	16	648	0.62	---	335	31	27.6	26.2	26.9
2014-08-27	27.1	1357	25	2359	26.4	11.61	20.45	30	1152	0	---	325	31	27.6	25.9	26.75
2014-08-28	27	1530	24.7	608	26.3	9.06	18.48	27	1805	0	---	435	40	27.8	25.9	26.85
2014-08-29	27.5	823	24	607	26.2	6.46	16	13	1040	0	---	395	37	27.9	26.9	27.4
2014-08-30	27.5	742	23	456	26	6.99	20.76	29	1620	0.2	---	355	34	28.2	27.6	27.9
2014-08-31	28	804	23.9	520	26.4	5.16	12.8	82	1520	0	---	379	36	28.5	27.5	28
2014-09-01	29.7	811	23.4	2047	26.1	4.58	15.8	61	1508	0.28	---	329	31	28.7	28	28.35
2014-09-02	27.9	750	24.1	410	26.3	5.97	13.9	65	2208	0.01	---	355	33	28.9	27.7	28.3
2014-09-03	27.4	1346	26	602	26.8	11.09	17.25	13	1550	0	---	423	39	28.6	27.4	28
2014-09-04	27.2	1336	25.2	1616	26.4	9	20.08	16	2047	0.01	---	329	32	28.5	26.6	27.55
2014-09-05	27.5	1321	24.2	2047	26.2	8.18	18.63	62	429	0.1	---	285	28	28.5	26.6	27.55
2014-09-06	27.7	1323	24.2	246	26.4	8.15	18.96	56	846	0.14	---	395	37	28.6	27.2	27.9
2014-09-07	28.2	739	24.8	609	26.7	6.78	14.6	38	1903	0	---	418	38	28.8	27.9	28.35
2014-09-08	27.4	1027	24.9	2345	26.7	8.36	15.65	47	1212	0.04	---	396	36	28.8	27.5	28.15
2014-09-09	27.5	1306	25.8	0	26.8	9.47	16.26	61	2132	0	---	378	35	28.6	27.8	28.2
2014-09-10	27.6	1421	26.1	217	26.9	10.37	16.55	37	2146	0	---	403	36	28.8	27.9	28.35
2014-09-11	27.7	1204	25.2	2128	26.7	8.59	18.28	56	2120	0.01	---	332	31	28.6	27.8	28.2
2014-09-12	28.2	802	24.6	615	26.6	6.74	15.74	56	154	0	---	450	39	28.9	27.8	28.35
2014-09-13	28.5	824	24.3	512	26.4	5.26	13	344	1530	0	---	343	31	28.8	27.7	28.25
2014-09-14	28.6	839	24	454	26.4	5.04	20.52	339	2044	0.07	---	416	36	29.3	28	28.65
2014-09-15	27.9	1217	24.1	345	26.6	6.53	17.08	351	442	0.39	---	378	33	29.3	28.1	28.7
2014-09-16	28	1558	24.9	2215	27.1	7.55	21.33	29	2201	0.02	---	350	31	29.3	27.6	28.45
2014-09-17	28	1105	24.9	209	26.6	5.36	20.78	13	1728	0.01	---	346	29	29.5	28.8	29.15
2014-09-18	28.2	951	24.5	332	26.2	3.63	13.28	136	2016	0.22	---	186	18	29.3	28.9	29.1
2014-09-19	29.7	838	24.5	611	26.3	2.87	13.68	349	1329	1.46	---	378	31	29.6	28.4	29
2014-09-20	30.2	929	24.4	532	26.9	4.11	13.98	72	1512	0	---	331	30	29.8	28.4	29.1
2014-09-21	28.7	844	25.6	639	27.5	7.71	15.78	65	1243	0	---	376	36	29.7	28.8	29.25
2014-09-22	28.2	1403	27	445	27.6	10.26	20.87	22	2047	0	---	396	38	29.6	27.8	28.7
2014-09-23	28.1	1245	25	313	27.4	12	19.86	16	1356	0.04	---	424	40	29.5	27.6	28.55
2014-09-24	28	1633	25.5	2311	27.3	10.17	19.38	26	1948	0.02	---	273	28	29.1	28.1	28.6
2014-09-25	28.2	1145	24.6	1730	27	10.96	24.51	68	1609	0.22	---	330	32	29.1	27.7	28.4
2014-09-26	28.1	1223	26.5	536	27.3	10.34	18.06	24	1428	0	---	254	26	29.1	28.3	28.7
2014-09-27	28.4	1050	26.1	701	27.4	12.07	21.44	85	629	0.02	---	246	25	29	28	28.5
2014-09-28	27.9	1034	24.1	2033	26.1	7.32	25.01	44	900	0.06	---	175	20	28.4	26.9	27.65
2014-09-29	28.7	1226	25.1	11	26.9	4.64	14.66	18	1814	0	---	325	32	29	27.4	28.2
2014-09-30	30.1	921	23.9	624	25.8	2.64	14.51	67	1117	0.71	---	197	21	28.7	28.2	28.45
2014-10-01	29	832	24.2	517	26.6	4.22	12.08	72	1650	0.01	---	380	36	29.1	27.9	28.5
2014-10-02	28.5	811	25	626	26.9	5.86	15.76	20	1510	0	---	345	33	29.1	27.8	28.45
2014-10-03	28	1316	26.1	2030	27.2	9.6	17.51	50	1957	0	---	325	31	28.9	27.8	28.35
2014-10-04	28.4	1513	22.8	1905	25.9	5.22	14.66	94	132	0.81	---	301	29	28.6	28.2	28.4
2014-10-05	28.5	1111	23.3	521	25.4	2.72	13.37	196	1752	0.1	---	223	22	28.6	27.9	28.25
2014-10-06	30.8	1219	24.2	222	27	2.88	16.26	330	1247	0.01	---	314	30	28.5	27.5	28
2014-10-07	29.8	1523	25.1	627	26.8	2.45	13.44	63	1057	0	---	162	18	28.5	28	28.25
2014-10-08	30.1	828	24.7	326	26.9	5	14.2	10	1632	0	---	323	31	28.9	27.9	28.4
2014-10-09	27.8	1137	25.4	204	27.1	9.9	22.97	22	1346	0.01	---	173	19	28.4	27.5	27.95
2014-10-10	27.9	1256	25.9	206	27.1	12.95	24.92	24	1249	0.02	---	286	28	28.6	27.4	28
2014-10-11	28.1	1522	25.6	154	27.2	13.43	24.88	104	143	0	---	339	32	28.4	27.6	28
2014-10-12	27.6	1327	26.5	2350	27.1	12.52	22.82	18	2145	0	---	275	27	28.2	26.5	27.35
2014-10-13	27.6	1522	25.6	902	26.8	12.9	22.95	31	2310	0	---	294	28	28.1	26.3	27.2
2014-10-14	27.6	1006	25.7	855	26.9	10.92	24.11	49	1515	0.12	---	149	17	27.6	26.5	27.05
2014-10-15	27.9	1057	25.2	206	26.8	6.84	17.84	47	48	0.13	---	260	26	27.9	26.8	27.35
2014-10-16	27.6	902	25.5	1	27	9.61	19.51	47	525	0	---	369	34	28	27.3	27.65
2014-10-17	27.9	2354	24.7	647	27	10.11	21.46	34	2352	0.16	---	242	24	27.9	27.1	27.5
2014-10-18	28.5	1136	24.1	1933	26.5	11.34	27.51	129	1146	0.77	---	45	7	27.7	27.2	27.45
2014-10-19	26.8	1919	23.4	449	25.5	8.22	20.34	32	1237	2.56	---	0	2	27.4	26.5	26.95
2014-10-20	27.6	1209	26.3	17	27	12.94	19.82	47	116	0	---	243	24	27.2	26.5	26.85
2014-10-21	27.5	1259	24.9	344	26.8	8.83	16.77	56	2102	0.07	---	298	29	27.5	26.7	27.1
2014-10-22	27.3	1044	24.7	1926	26.2	7.26	15.94	76	1657	0.11	---	215	22	27.7	27.2	27.45
2014-10-23	27.5	1446	24.8	1923	26.7	9.97	24.18	22	1909	0.02	---	362	33	27.9	26.4	27.15
2014-10-24	27.6	1136	24.3	210	26.5	10.5	23.67	62	2	0.01	---	309	29	27.8	26.3	27.05
2014-10-25	27.4	1611	24.8	524	26.5	9.92	20.78	81	2237	0	---	273	26	27.7	26.8	27.25
2014-10-26	26.9	1449	25.7	6	26.4	10.42	23.19	87	21	0	---	288	27	27.6	26.8	27.2
2014-10-27	26.9	1032	24.4	1740	26.3	10.09	19.51	37	1130	0.01	---	214	21	27.5	25.9	26.7
2014-10-28	27	1637	23.8	449	26	9.26	20.58	62	1155	0	---	266	25	27.4	25.9	26.65
2014-10-29	27	1239	24.5	2201	26.2	11.95	23.7	48	921	0.15	---	235	23	27.3	25.7	26.5
2014-10-30	26.9	1008	23.9	203	26.1	13.88	28.08	15	147	0.08	---	174	19	27.2	25.6	26.4
2014-10-31	26.8	2000	22.6	1236	25.8	14.73	28.3	46	1224	0.02	---	163	18	26.9	25	25.95
2014-11-01	27.3	1154	24	2351	26.5	12.68	20.45	50	1113	0.08	---	337	31	26.9	26	26.45
2014-11-02	27.1	1021	23.9	700	26	13.92	24.79	74	409	0.05	---	282	27	27	26.2	26.6
2014-11-03	27.1	1256	25.6	132	26.4	10.83	20.14	53	713	0.02	---	199	20	26.7	26.2	26.45
2014-11-04	27.2	1058	24.2	637	26.1	7.2	15.69	17	2057	0	---	255	24	26.9	25.7	26.3
2014-11-05	26.9	1531	23.3	648	26	11.33	23.94	51	637	0.16	---	258	25	26.9	25.5	26.2
2014-11-06	26.9	1354	25.6	545	26.3	9.49	15.26	64	742	0	---	244	23	26.8	26.2	26.5
2014-11-07	28	924	22.8	740	25.1	4.04	17.69	334	1835	0.02	---	292	27	27	26.3	26.65
2014-11-08	25.6	550	22.6	321	24.5	14.1	27.09	345	502	0.27	---	98	12	26.6	23.5	25.05
2014-11-09	25.7	953	20.7	526	23.6	3.99	13.59	18	126	0	---	196	19	26.3	23.7	25
2014-11-10	27.3	938	21.3	508	23.7	3.52	15.48	345	1223	0	---	222	21	26.1	25.6	25.85
2014-11-11	26.6	859	21.5	2232	23.5	6.26	21.81	25	1901	0.33	---	308	28	26.2	24.9	25.55
2014-11-12	26.8	858	21.6	634	24	2.61	11	343	1448	0.14	---	296	27	26.5	25.1	25.8
2014-11-13	27.2	907	22.9	624	24.4	2.69	13.02	92	1446	0	---	132	15	26.4	25.8	26.1
2014-11-14	28.9	1211	23.4	6	25.9	3.89	14.36	19	1440	0	---	170	17	26.2	25.5	25.85
2014-11-15	29.3	1433	21.4	536	25.4	3.66	15.23	176	1341	1.13	---	222	21	27.1	25.8	26.45
2014-11-16	25.7	1501	22.4	328	24.9	12.19	22.45	28	424	0.42	---	240	23	26.7	24.5	25.6
2014-11-17	25.6	1554	24.7	555	25.1	13.52	21.02	22	1107	0	---	222	21	25.9	23.8	24.85
2014-11-18	26.1	1519	24	1928	25.4	14.51	26.24	10	1918	0	---	259	24	25.8	23.8	24.8
2014-11-19	26.1	1117	24.9	213	25.6	16.13	26	59	708	0	---	276	25	25.2	23.7	24.45
2014-11-20	26.2	1416	24.5	141	25.7	14	23.45	58	400	0	---	132	15	25.2	24.5	24.85
2014-11-21	26.2	1045	24.4	526	25.6	10.94	21.33	57	1813	0	---	238	22	25.4	24.5	24.95
2014-11-22	26.6	1240	25.1	544	25.8	11.46	21.04	80	1311	0	---	249	23	25.5	24.9	25.2
2014-11-23	27.9	904	22	640	25.3	3.34	14.42	205	1548	0	---	235	22	25.7	24.9	25.3
2014-11-24	25.5	433	21.3	813	23.5	10.26	30.73	316	639	0.2	---	69	9	25.1	22.8	23.95
2014-11-25	24.1	1319	21.6	446	23.2	9.7	26.59	11	2012	0	---	99	11	24.7	22.7	23.7
2014-11-26	24.5	1136	23	1919	24	14.41	24.11	26	1340	0	---	181	18	24.6	22.6	23.6
2014-11-27	24.6	2251	23.8	514	24.1	17.54	25.71	19	1432	0	---	245	23	24.3	22.9	23.6
2014-11-28	25	1128	23.4	641	24.3	16.55	26.63	26	1331	0	---	76	10	23.7	22.3	23
2014-11-29	24.4	1356	21.1	2304	23.6	16.19	27.82	39	336	0.05	---	126	14	23.7	22.6	23.15
2014-11-30	24.7	1020	21.1	40	23.8	16.47	24.73	26	1556	0.05	---	257	24	23.8	22.3	23.05
2014-12-01	24.1	1401	21.6	2114	23.3	16.57	25.98	36	1706	0	---	166	17	23.5	22	22.75
2014-12-02	23.9	922	21.4	2103	23	12.53	21.77	60	1959	0.01	---	207	20	23.7	21.6	22.65
2014-12-03	22.9	128	20	2122	21.5	8.03	20.82	36	715	0.9	---	67	10	23	22.1	22.55
2014-12-04	24	1332	19.9	105	22.6	6.84	17.73	42	1259	0.08	---	71	10	23.2	22.5	22.85
2014-12-05	24.7	1132	21.8	539	23.6	7.35	17.97	43	1114	0	---	164	17	23.4	22.4	22.9
2014-12-06	24.3	1602	21.1	2359	23.6	7.72	14.36	45	1029	0	---	295	27	23.5	22	22.75
2014-12-07	25.7	1002	20.2	551	22.9	3.07	10.72	5	1614	0	---	299	27	25	23.3	24.15
2014-12-08	28.2	1108	20.1	637	23.6	2.61	14.55	335	1515	0	---	305	27	24.5	23.9	24.2
2014-12-09	26.4	1129	21	159	23.6	2.58	10.78	50	1617	0	---	258	24	25	23.9	24.45
2014-12-10	26	903	20.7	602	23.3	7.1	24.07	24	1637	0.02	---	227	22	24.6	23.8	24.2
2014-12-11	24.4	15	22.3	1425	24	12.33	20.63	48	1135	0	---	92	11	24.4	23.3	23.85
2014-12-12	25.7	1207	21.4	510	23.5	5.9	16.57	56	148	0.08	---	205	20	24.6	23.3	23.95
2014-12-13	24.8	1341	22.1	2306	23.9	13.59	23.32	36	2305	0	---	180	18	24.2	22.9	23.55
2014-12-14	23.7	2256	21.2	427	22.9	19.06	30.07	10	809	0.09	---	46	7	23.5	22.2	22.85
2014-12-15	24.1	1018	21.2	836	23	16.22	28.54	30	215	0	---	152	16	23.5	22.1	22.8
2014-12-16	24.8	1146	21.2	157	23.7	14.57	26.57	57	553	0.03	---	197	19	23.4	22.2	22.8
2014-12-17	25	1236	22.9	16	24.1	11.57	23.94	40	14	0.01	---	227	22	23.8	22.6	23.2
2014-12-18	24.6	1552	22.3	1110	23.9	13.84	25.89	52	1527	0	---	181	18	24	22.8	23.4
2014-12-19	25.1	1550	23.6	1218	24.5	13.3	22.14	75	953	0	---	251	23	23.8	23.1	23.45
2014-12-20	25.5	1309	23.5	2233	24.6	7.77	17.29	73	5	0	---	233	22	24.1	23.2	23.65
2014-12-21	25.8	1628	22.5	528	24	3.37	10.7	58	1342	0.01	---	296	26	24.4	23.5	23.95
2014-12-22	23.7	427	20.4	1323	22.3	20.45	36.56	336	1548	0.71	---	32	6	24.2	21.8	23
2014-12-23	22.9	1457	20.1	2011	22.3	20.2	29.5	354	2329	0.15	---	122	13	23.2	21.8	22.5
2014-12-24	23.5	1205	19.8	152	21.4	3.8	26.96	330	7	0.47	---	150	16	23.3	21.9	22.6
2014-12-25	24.5	1538	19	644	21.9	2.41	9.45	78	1303	0	---	283	26	24	23	23.5
2014-12-26	24.7	920	20.3	209	22.4	2.71	13.92	328	1842	0	---	205	20	24	23.3	23.65
2014-12-27	24	915	20	622	22.1	10.17	27.73	323	1451	0	---	300	26	24	21.8	22.9
2014-12-28	23	1618	21.6	321	22.4	11.61	22.29	348	758	0	---	282	25	24.1	21.5	22.8
2014-12-29	23.9	1153	19.7	2309	22.2	4.61	11.99	75	1057	0	---	206	19	23.5	22	22.75
2014-12-30	25.7	1158	19.4	23	21.3	4.97	30.07	206	1536	0.53	---	144	14	23.2	22.8	23
2014-12-31	23.4	1300	18.7	236	20.6	3.65	18.11	330	1041	0	---	257	22	23	21.9	22.45
2015-01-01	23.4	1529	18	611	20.4	2.84	14.05	351	1311	0	---	200	18	22.9	21.6	22.25

## Sheet: Freshwater Kill
Date	Time		Temperature (F)	Wind Speed (mph)	Wind Direction	Max Wind Gust (mph)	Avg Solar Rad (Cal/cm2/min)	Avg Quantum (uE/sec/m2)	Water Temp (F)	Rainfall (In)
2014-07-15	01:00:00	2014-07-15 01:00:00	26.1	11.56	59	15.56	0	0	27	0
2014-07-15	02:00:00	2014-07-15 02:00:00	26	10.62	53	15.8	0	0	27	0
2014-07-15	03:00:00	2014-07-15 03:00:00	25.9	9.99	49	14.42	0	0	26.8	0
2014-07-15	04:00:00	2014-07-15 04:00:00	26	10.39	56	13.44	0	0	26.6	0
2014-07-15	05:00:00	2014-07-15 05:00:00	26	9.81	50	13.37	0	0	26.7	0
2014-07-15	06:00:00	2014-07-15 06:00:00	25.8	9.65	50	13.63	0	0	26.8	0
2014-07-15	07:00:00	2014-07-15 07:00:00	25.9	9.24	38	12.38	0.025	88	26.6	0
2014-07-15	08:00:00	2014-07-15 08:00:00	26	9.07	26	13.06	0.171	310	26.2	0
2014-07-15	09:00:00	2014-07-15 09:00:00	26.1	9.8	18	13.96	0.607	820	26.3	0
2014-07-15	10:00:00	2014-07-15 10:00:00	26.1	11.52	17	15.76	0.858	1111	26.7	0
2014-07-15	11:00:00	2014-07-15 11:00:00	26.1	11.69	17	16.55	1.118	1408	27.2	0
2014-07-15	12:00:00	2014-07-15 12:00:00	26.2	11.33	12	16	0.897	1171	27.4	0
2014-07-15	13:00:00	2014-07-15 13:00:00	26.2	11.34	10	17.51	1.263	1583	27.3	0
2014-07-15	14:00:00	2014-07-15 14:00:00	26.2	11.42	13	16.92	1.057	1348	27.3	0
2014-07-15	15:00:00	2014-07-15 15:00:00	26.2	11.82	4	16.79	1.005	1284	27.4	0
2014-07-15	16:00:00	2014-07-15 16:00:00	26.3	12.62	9	17.58	0.801	1043	27.5	0
2014-07-15	17:00:00	2014-07-15 17:00:00	26.3	13.35	14	17.78	0.421	611	27.6	0
2014-07-15	18:00:00	2014-07-15 18:00:00	26.2	12.2	10	19.75	0.067	178	27.7	0
2014-07-15	19:00:00	2014-07-15 19:00:00	26.3	11.19	18	14.51	0	46	27.6	0
2014-07-15	20:00:00	2014-07-15 20:00:00	26	11.1	29	18.48	0	0	27.6	0
2014-07-15	21:00:00	2014-07-15 21:00:00	26.1	10	49	14.31	0	0	27.6	0
2014-07-15	22:00:00	2014-07-15 22:00:00	25.6	10.45	45	18.79	0	0	27.5	0.02
2014-07-15	23:00:00	2014-07-15 23:00:00	25.7	9.38	49	14.53	0	0	27.5	0
2014-07-15	1900-01-01	2014-07-16 00:00:00	25.7	11.64	38	18.22	0	0	27.5	0.01
2014-07-16	01:00:00	2014-07-16 01:00:00	25.6	11.91	41	21	0	0	27.3	0.03
2014-07-16	02:00:00	2014-07-16 02:00:00	25.8	13.33	55	24.05	0	0	27.1	0.02
2014-07-16	03:00:00	2014-07-16 03:00:00	25.7	12.39	60	17.69	0	0	27.1	0
2014-07-16	04:00:00	2014-07-16 04:00:00	26	12.72	52	17.47	0	0	27.1	0
2014-07-16	05:00:00	2014-07-16 05:00:00	26.1	12.1	57	18.72	0	0	26.8	0
2014-07-16	06:00:00	2014-07-16 06:00:00	26	13.29	45	18.65	0	0	26.8	0
2014-07-16	07:00:00	2014-07-16 07:00:00	25.9	15.67	43	21.77	0.031	88	26.4	0
2014-07-16	08:00:00	2014-07-16 08:00:00	26.1	15.17	35	20.69	0.214	350	26.4	0
2014-07-16	09:00:00	2014-07-16 09:00:00	26.2	14.25	41	21.07	0.399	588	26.6	0
2014-07-16	10:00:00	2014-07-16 10:00:00	26.3	16	53	22.56	0.912	1173	27	0
2014-07-16	11:00:00	2014-07-16 11:00:00	26.4	16.27	56	21.24	1.26	1560	27.4	0
2014-07-16	12:00:00	2014-07-16 12:00:00	26.3	15.44	54	20.14	1.361	1678	27.6	0
2014-07-16	13:00:00	2014-07-16 13:00:00	26.3	14.6	60	19.73	1.278	1595	27.8	0
2014-07-16	14:00:00	2014-07-16 14:00:00	26.2	14.19	53	21.26	0.543	766	27.8	0
2014-07-16	15:00:00	2014-07-16 15:00:00	26.2	13.62	56	18.92	0.508	722	27.6	0
2014-07-16	16:00:00	2014-07-16 16:00:00	26.2	12.68	52	17.69	0.377	568	27.6	0
2014-07-16	17:00:00	2014-07-16 17:00:00	26.2	12.66	54	17.8	0.342	517	27.6	0
2014-07-16	18:00:00	2014-07-16 18:00:00	26.3	12.75	42	17.08	0.428	582	27.6	0
2014-07-16	19:00:00	2014-07-16 19:00:00	26.2	11.24	29	15.56	0.085	159	27.6	0
2014-07-16	20:00:00	2014-07-16 20:00:00	26	12.59	29	16.31	0	1	27.6	0
2014-07-16	21:00:00	2014-07-16 21:00:00	25.9	12.65	34	17.1	0	0	27.6	0
2014-07-16	22:00:00	2014-07-16 22:00:00	25.9	11.96	35	15.98	0	0	27.4	0
2014-07-16	23:00:00	2014-07-16 23:00:00	25.8	11.92	36	14.99	0	0	26.9	0
2014-07-16	1900-01-01	2014-07-17 00:00:00	25.8	12.8	29	18.43	0	0	26.5	0
2014-07-17	01:00:00	2014-07-17 01:00:00	25.6	12.64	36	16.07	0	0	26.5	0
2014-07-17	02:00:00	2014-07-17 02:00:00	25.6	11.9	30	15.85	0	0	26.1	0
2014-07-17	03:00:00	2014-07-17 03:00:00	25.5	14.24	32	20.43	0	0	25.9	0
2014-07-17	04:00:00	2014-07-17 04:00:00	25.3	14.82	36	20.32	0	0	25.8	0
2014-07-17	05:00:00	2014-07-17 05:00:00	25.3	16.1	36	21.09	0	0	25.7	0
2014-07-17	06:00:00	2014-07-17 06:00:00	24.8	14.74	39	23.06	0	0	25.8	0
2014-07-17	07:00:00	2014-07-17 07:00:00	24.8	15.49	50	25.03	0.03	74	26.1	0
2014-07-17	08:00:00	2014-07-17 08:00:00	25.1	16.91	34	27.36	0.125	244	26.3	0
2014-07-17	09:00:00	2014-07-17 09:00:00	24.4	17.71	30	27.44	0.3	470	26.1	0.01
2014-07-17	10:00:00	2014-07-17 10:00:00	24	13.54	48	24.38	0.224	398	26.4	0.04
2014-07-17	11:00:00	2014-07-17 11:00:00	24.9	15.8	65	23.59	0.489	714	26.8	0
2014-07-17	12:00:00	2014-07-17 12:00:00	25.5	15.13	60	23.89	0.65	902	27	0
2014-07-17	13:00:00	2014-07-17 13:00:00	25.7	13.06	72	20.39	0.565	805	27.1	0
2014-07-17	14:00:00	2014-07-17 14:00:00	25.9	15.13	62	20.54	0.606	840	27.1	0.02
2014-07-17	15:00:00	2014-07-17 15:00:00	26.1	16.05	55	22.53	0.593	821	27.1	0
2014-07-17	16:00:00	2014-07-17 16:00:00	26.2	15.11	53	19.84	0.227	398	27.1	0
2014-07-17	17:00:00	2014-07-17 17:00:00	26.1	15.39	57	20.91	0.18	336	27.1	0
2014-07-17	18:00:00	2014-07-17 18:00:00	26.1	13.74	48	19.46	0.151	278	27.1	0
2014-07-17	19:00:00	2014-07-17 19:00:00	26	12.3	36	17.23	0.022	80	27	0
2014-07-17	20:00:00	2014-07-17 20:00:00	26	12.43	34	18.43	0	0	26.8	0
2014-07-17	21:00:00	2014-07-17 21:00:00	25.9	11.97	33	16.64	0	0	26.6	0
2014-07-17	22:00:00	2014-07-17 22:00:00	25.9	12.67	41	18.87	0	0	26.5	0
2014-07-17	23:00:00	2014-07-17 23:00:00	25.6	11.19	43	17.95	0	0	26.4	0
2014-07-17	1900-01-01	2014-07-18 00:00:00	25.5	13.56	31	18.87	0	0	26.1	0
2014-07-18	01:00:00	2014-07-18 01:00:00	25.5	11.48	43	16.66	0	0	26	0
2014-07-18	02:00:00	2014-07-18 02:00:00	25	13.79	52	20.93	0	0	26.3	0
2014-07-18	03:00:00	2014-07-18 03:00:00	25.4	14.25	54	21.22	0	0	26.6	0
2014-07-18	04:00:00	2014-07-18 04:00:00	25.2	14.1	59	20.43	0	0	26.7	0.02
2014-07-18	05:00:00	2014-07-18 05:00:00	25.4	13.54	50	18.79	0	0	26.7	0
2014-07-18	06:00:00	2014-07-18 06:00:00	25.5	11.84	40	18.06	0	0	26.2	0
2014-07-18	07:00:00	2014-07-18 07:00:00	25.6	11.28	38	16.05	0.017	75	25.6	0
2014-07-18	08:00:00	2014-07-18 08:00:00	25.9	12.42	44	17.69	0.283	425	25.4	0
2014-07-18	09:00:00	2014-07-18 09:00:00	25.9	12.83	42	17.47	0.536	732	25.8	0
2014-07-18	10:00:00	2014-07-18 10:00:00	26	12.66	55	17.97	0.707	933	26.2	0
2014-07-18	11:00:00	2014-07-18 11:00:00	26.1	13.83	53	19.09	1.008	1268	26.7	0
2014-07-18	12:00:00	2014-07-18 12:00:00	26.1	13.36	54	18.9	1.131	1416	26.9	0
2014-07-18	13:00:00	2014-07-18 13:00:00	26.1	13.58	52	19.75	0.84	1100	27.1	0
2014-07-18	14:00:00	2014-07-18 14:00:00	26.1	13.52	55	18.79	0.923	1186	27.1	0
2014-07-18	15:00:00	2014-07-18 15:00:00	26.1	13.27	62	18.26	0.634	857	27.2	0
2014-07-18	16:00:00	2014-07-18 16:00:00	26.1	12.68	57	18.26	0.345	528	27.2	0
2014-07-18	17:00:00	2014-07-18 17:00:00	26.1	12.55	58	19.09	0.12	264	27.2	0
2014-07-18	18:00:00	2014-07-18 18:00:00	26.1	13.75	57	18.65	0.139	268	27.2	0
2014-07-18	19:00:00	2014-07-18 19:00:00	26	13.94	59	18.19	0.011	71	27.2	0
2014-07-18	20:00:00	2014-07-18 20:00:00	26	12.76	57	16.99	0	1	27.2	0
2014-07-18	21:00:00	2014-07-18 21:00:00	25.9	11.71	47	15.56	0	0	27.1	0
2014-07-18	22:00:00	2014-07-18 22:00:00	25.9	11.72	50	16	0	0	27	0
2014-07-18	23:00:00	2014-07-18 23:00:00	25.8	11.17	51	16.77	0	0	26.9	0
2014-07-18	1900-01-01	2014-07-19 00:00:00	25.8	11.97	52	16.97	0	0	26.9	0
2014-07-19	01:00:00	2014-07-19 01:00:00	25.7	11.71	58	15.85	0	0	26.9	0
2014-07-19	02:00:00	2014-07-19 02:00:00	25.6	10.96	55	15.26	0	0	26.7	0
2014-07-19	03:00:00	2014-07-19 03:00:00	25.6	10.3	56	13.88	0	0	26.6	0
2014-07-19	04:00:00	2014-07-19 04:00:00	25.5	9.91	51	14.86	0	0	26.5	0
2014-07-19	05:00:00	2014-07-19 05:00:00	25.5	10.48	52	13.52	0	0	26.4	0
2014-07-19	06:00:00	2014-07-19 06:00:00	25.5	10.39	52	14.71	0	0	26.2	0
2014-07-19	07:00:00	2014-07-19 07:00:00	25.7	11.31	58	14.38	0.031	89	26	0
2014-07-19	08:00:00	2014-07-19 08:00:00	25.9	10.65	51	14.64	0.207	342	26.4	0
2014-07-19	09:00:00	2014-07-19 09:00:00	26	11.96	56	16.92	0.534	730	26.4	0
2014-07-19	10:00:00	2014-07-19 10:00:00	26.1	12.72	54	18.08	0.949	1201	26.7	0
2014-07-19	11:00:00	2014-07-19 11:00:00	26.2	13.46	63	18.37	0.917	1183	26.9	0
2014-07-19	12:00:00	2014-07-19 12:00:00	26.3	14.56	62	19.22	1.273	1602	27	0
2014-07-19	13:00:00	2014-07-19 13:00:00	26.3	13.56	55	18.5	1.123	1438	27.2	0
2014-07-19	14:00:00	2014-07-19 14:00:00	26.2	12.89	34	17.93	0.327	527	27.2	0
2014-07-19	15:00:00	2014-07-19 15:00:00	26.3	13.12	20	18.22	0.699	936	27.1	0
2014-07-19	16:00:00	2014-07-19 16:00:00	26.3	14.21	28	19.11	0.63	859	27.1	0
2014-07-19	17:00:00	2014-07-19 17:00:00	26.3	13.2	32	18.79	0.318	487	27.2	0
2014-07-19	18:00:00	2014-07-19 18:00:00	26.3	11.75	16	16.16	0.164	298	27.2	0
2014-07-19	19:00:00	2014-07-19 19:00:00	25.1	12.15	22	20.8	0	38	27.2	0
2014-07-19	20:00:00	2014-07-19 20:00:00	24.5	9.5	360	12.58	0	0	27.2	0.04
2014-07-19	21:00:00	2014-07-19 21:00:00	24.7	12.01	6	17.36	0	0	26.9	0.1
2014-07-19	22:00:00	2014-07-19 22:00:00	25.3	13.09	40	22.82	0	0	26.9	0.08
2014-07-19	23:00:00	2014-07-19 23:00:00	25.2	11.34	57	20.1	0	0	26.8	0.71
2014-07-19	1900-01-01	2014-07-20 00:00:00	23.9	4.51	228	13.26	0	0	26.7	1.11
2014-07-20	01:00:00	2014-07-20 01:00:00	25	14.43	56	20.28	0	0	26.6	0.15
2014-07-20	02:00:00	2014-07-20 02:00:00	24.7	15.68	46	22.8	0	0	26.6	0.06
2014-07-20	03:00:00	2014-07-20 03:00:00	24	14.89	3	29.48	0	0	26.7	1.41
2014-07-20	04:00:00	2014-07-20 04:00:00	22.9	20.23	25	29.94	0	0	26.5	1.54
2014-07-20	05:00:00	2014-07-20 05:00:00	22.5	13.97	54	24.92	0	0	26.5	0.32
2014-07-20	06:00:00	2014-07-20 06:00:00	22.9	11.4	74	17.34	0	0	26.5	0
2014-07-20	07:00:00	2014-07-20 07:00:00	23.5	11.45	83	16.94	0	31	26.6	0
2014-07-20	08:00:00	2014-07-20 08:00:00	23.9	9.56	90	12.8	0.101	228	26.7	0
2014-07-20	09:00:00	2014-07-20 09:00:00	24.5	9.86	80	15.3	0.296	472	26.7	0
2014-07-20	10:00:00	2014-07-20 10:00:00	24.7	11.24	90	16	0.317	502	26.5	0
2014-07-20	11:00:00	2014-07-20 11:00:00	25.1	13.15	80	19.16	0.645	894	26.3	0
2014-07-20	12:00:00	2014-07-20 12:00:00	25.4	12.03	76	16.79	0.74	1005	26.2	0
2014-07-20	13:00:00	2014-07-20 13:00:00	25.7	10.44	65	14.93	1.152	1479	26.3	0
2014-07-20	14:00:00	2014-07-20 14:00:00	26.1	10.98	64	17.58	0.964	1266	26.4	0
2014-07-20	15:00:00	2014-07-20 15:00:00	26.2	12.98	40	21.15	0.456	681	26.5	0
2014-07-20	16:00:00	2014-07-20 16:00:00	26.1	10.81	53	21.64	0.322	509	26.6	0
2014-07-20	17:00:00	2014-07-20 17:00:00	26.2	11.6	52	16.48	0.203	356	26.6	0
2014-07-20	18:00:00	2014-07-20 18:00:00	25.9	12.21	59	17.67	0.082	202	26.7	0
2014-07-20	19:00:00	2014-07-20 19:00:00	25.7	10.11	60	15.15	0.002	63	26.7	0
2014-07-20	20:00:00	2014-07-20 20:00:00	25.9	11.13	73	14.95	0	0	26.7	0
2014-07-20	21:00:00	2014-07-20 21:00:00	25.9	11.89	69	16.62	0	0	26.7	0
2014-07-20	22:00:00	2014-07-20 22:00:00	25.9	11.64	57	16.13	0	0	26.7	0
2014-07-20	23:00:00	2014-07-20 23:00:00	26	12.6	59	17.65	0	0	26.6	0
2014-07-20	1900-01-01	2014-07-21 00:00:00	26.1	14.78	61	20.41	0	0	26.6	0
2014-07-21	01:00:00	2014-07-21 01:00:00	26.1	15.02	63	18.83	0	0	26.5	0
2014-07-21	02:00:00	2014-07-21 02:00:00	25.8	14.11	67	19.16	0	0	26.5	0
2014-07-21	03:00:00	2014-07-21 03:00:00	25.9	13.31	66	17.47	0	0	26.5	0
2014-07-21	04:00:00	2014-07-21 04:00:00	25.8	14.11	78	19.38	0	0	26.5	0
2014-07-21	05:00:00	2014-07-21 05:00:00	25.3	11.85	86	17.34	0	0	26.5	0.01
2014-07-21	06:00:00	2014-07-21 06:00:00	25.7	11.98	85	18.02	0	0	26.5	0.05
2014-07-21	07:00:00	2014-07-21 07:00:00	26	12.19	77	16.33	0.015	61	26.5	0
2014-07-21	08:00:00	2014-07-21 08:00:00	26.1	11.58	69	15.94	0.132	261	26.5	0
2014-07-21	09:00:00	2014-07-21 09:00:00	26.1	11.44	76	16.37	0.326	504	26.5	0
2014-07-21	10:00:00	2014-07-21 10:00:00	26.1	10.36	68	15.87	0.508	721	26.5	0.01
2014-07-21	11:00:00	2014-07-21 11:00:00	26.4	11.67	69	15.61	0.914	1195	26.6	0
2014-07-21	12:00:00	2014-07-21 12:00:00	26.4	10.51	71	16.42	1.055	1356	26.7	0
2014-07-21	13:00:00	2014-07-21 13:00:00	26.5	8.85	65	12.54	1.068	1379	26.8	0
2014-07-21	14:00:00	2014-07-21 14:00:00	26.8	7.42	58	11.88	1.374	1718	26.9	0
2014-07-21	15:00:00	2014-07-21 15:00:00	27.1	7.55	61	10.63	0.965	1251	27	0
2014-07-21	16:00:00	2014-07-21 16:00:00	27	7.68	71	9.91	0.477	695	27	0
2014-07-21	17:00:00	2014-07-21 17:00:00	26.9	7.48	69	10.72	0.324	504	27	0
2014-07-21	18:00:00	2014-07-21 18:00:00	26.8	7.88	73	10.92	0.051	163	27.1	0
2014-07-21	19:00:00	2014-07-21 19:00:00	26.5	6.86	65	10.43	0	34	27.3	0
2014-07-21	20:00:00	2014-07-21 20:00:00	26.4	7.18	58	11.27	0	0	27.5	0
2014-07-21	21:00:00	2014-07-21 21:00:00	26.5	6.71	57	11.6	0	0	27.5	0
2014-07-21	22:00:00	2014-07-21 22:00:00	26.5	7.65	64	11.97	0	0	27.5	0
2014-07-21	23:00:00	2014-07-21 23:00:00	26.5	9.24	67	13.44	0	0	27.6	0
2014-07-21	1900-01-01	2014-07-22 00:00:00	26.5	6.18	77	10.81	0	0	27.5	0
2014-07-22	01:00:00	2014-07-22 01:00:00	26.1	1.62	242	4.21	0	0	27.3	0
2014-07-22	02:00:00	2014-07-22 02:00:00	25.9	1.14	210	4.05	0	0	27.2	0
2014-07-22	03:00:00	2014-07-22 03:00:00	25.6	1.6	197	4.27	0	0	27.1	0
2014-07-22	04:00:00	2014-07-22 04:00:00	25.2	0.94	205	3.03	0	0	27	0
2014-07-22	05:00:00	2014-07-22 05:00:00	24.9	0.92	238	3.48	0	0	27	0
2014-07-22	06:00:00	2014-07-22 06:00:00	25	1.19	253	3.24	0	0	27	0
2014-07-22	07:00:00	2014-07-22 07:00:00	25.1	0.78	191	3.48	0	13	27	0
2014-07-22	08:00:00	2014-07-22 08:00:00	25.6	1.34	261	3.81	0.121	240	27	0.07
2014-07-22	09:00:00	2014-07-22 09:00:00	26	2.38	258	16.16	0.076	197	26.9	0.23
2014-07-22	10:00:00	2014-07-22 10:00:00	26.6	12.11	81	18.02	0.381	601	27	0
2014-07-22	11:00:00	2014-07-22 11:00:00	26.8	14.86	70	19.07	0.738	1001	27	0
2014-07-22	12:00:00	2014-07-22 12:00:00	26.7	13.96	70	17.82	0.809	1098	27.1	0
2014-07-22	13:00:00	2014-07-22 13:00:00	26.7	12.19	65	16.53	0.629	887	27.3	0
2014-07-22	14:00:00	2014-07-22 14:00:00	26.7	14.25	61	19.46	1.098	1416	27.5	0
2014-07-22	15:00:00	2014-07-22 15:00:00	26.3	15.94	57	20.3	0.752	1022	27.6	0
2014-07-22	16:00:00	2014-07-22 16:00:00	26.2	13.7	58	20.82	0.296	483	27.8	0.04
2014-07-22	17:00:00	2014-07-22 17:00:00	26.6	15.01	66	19.51	0.234	405	27.8	0
2014-07-22	18:00:00	2014-07-22 18:00:00	26.5	15.15	65	19.95	0.121	252	27.8	0
2014-07-22	19:00:00	2014-07-22 19:00:00	26.4	14.96	64	19.82	0.021	88	27.9	0
2014-07-22	20:00:00	2014-07-22 20:00:00	26.4	13.43	71	17.71	0	0	27.8	0
2014-07-22	21:00:00	2014-07-22 21:00:00	26.4	13.45	73	18.65	0	0	27.7	0
2014-07-22	22:00:00	2014-07-22 22:00:00	26.3	13.69	68	16.48	0	0	27.6	0
2014-07-22	23:00:00	2014-07-22 23:00:00	26.1	13.45	68	17.56	0	0	27.6	0
2014-07-22	1900-01-01	2014-07-23 00:00:00	26.1	12.38	74	16.09	0	0	27.5	0
2014-07-23	01:00:00	2014-07-23 01:00:00	26	12.14	61	16.42	0	0	27.5	0
2014-07-23	02:00:00	2014-07-23 02:00:00	25.9	12.47	54	17.1	0	0	27.4	0
2014-07-23	03:00:00	2014-07-23 03:00:00	26	13.18	42	21.2	0	0	27.2	0
2014-07-23	04:00:00	2014-07-23 04:00:00	26	16.09	50	21.09	0	0	27.1	0
2014-07-23	05:00:00	2014-07-23 05:00:00	25.9	16.94	50	22.03	0	0	27.1	0
2014-07-23	06:00:00	2014-07-23 06:00:00	25.8	11.62	42	16.81	0	0	27	0
2014-07-23	07:00:00	2014-07-23 07:00:00	25.9	11.02	41	17.45	0.006	52	27.1	0
2014-07-23	08:00:00	2014-07-23 08:00:00	26.2	10.96	43	15.39	0.128	253	27	0
2014-07-23	09:00:00	2014-07-23 09:00:00	26.6	11.54	45	17.69	0.586	790	26.9	0
2014-07-23	10:00:00	2014-07-23 10:00:01	26.8	14.73	51	19.38	0.875	1127	27	0
2014-07-23	11:00:00	2014-07-23 11:00:01	26.5	15.03	56	20.85	1.047	1325	27.2	0
2014-07-23	12:00:00	2014-07-23 12:00:01	26.7	12.66	48	19.46	1.085	1373	27.3	0
2014-07-23	13:00:00	2014-07-23 13:00:01	26.5	13.67	48	19.18	0.857	1120	27.4	0
2014-07-23	14:00:00	2014-07-23 14:00:01	26.6	15.71	53	21.5	1.063	1349	27.4	0
2014-07-23	15:00:00	2014-07-23 15:00:01	26.6	14.74	52	20.1	0.805	1057	27.5	0
2014-07-23	16:00:00	2014-07-23 16:00:01	26.5	15.31	51	20.41	0.618	837	27.5	0
2014-07-23	17:00:00	2014-07-23 17:00:01	26.6	14.64	45	19.73	0.264	430	27.6	0
2014-07-23	18:00:00	2014-07-23 18:00:01	26.3	16.42	38	23.74	0.093	208	27.7	0
2014-07-23	19:00:00	2014-07-23 19:00:01	26	16.17	36	23.7	0.001	49	27.7	0
2014-07-23	20:00:00	2014-07-23 20:00:01	26	16.02	35	25.19	0	0	27.6	0
2014-07-23	21:00:00	2014-07-23 21:00:01	26.2	15.96	46	22.12	0	0	27.5	0
2014-07-23	22:00:00	2014-07-23 22:00:01	26.3	15.34	37	22.42	0	0	27.2	0
2014-07-23	23:00:00	2014-07-23 23:00:01	26.1	14.78	48	22.29	0	0	26.8	0
2014-07-23	1900-01-01	2014-07-24 00:00:01	26.1	14.27	40	20.71	0	0	26.7	0
2014-07-24	01:00:00	2014-07-24 01:00:01	26	15.07	37	21.13	0	0	26.3	0
2014-07-24	02:00:00	2014-07-24 02:00:01	25.7	15.02	42	21.88	0	0	26.2	0
2014-07-24	03:00:00	2014-07-24 03:00:01	25.7	14.9	35	19.55	0	0	26.1	0
2014-07-24	04:00:00	2014-07-24 04:00:01	25.6	16.05	30	20.43	0	0	25.9	0
2014-07-24	05:00:00	2014-07-24 05:00:01	25.6	14.68	35	19.62	0	0	26.1	0
2014-07-24	06:00:00	2014-07-24 06:00:01	25.6	15.27	36	20.17	0	0	26.2	0
2014-07-24	07:00:00	2014-07-24 07:00:01	25.6	13.83	34	19.18	0.003	57	26.5	0
2014-07-24	08:00:00	2014-07-24 08:00:01	25.9	14.97	34	20.25	0.237	371	26.6	0
2014-07-24	09:00:00	2014-07-24 09:00:01	26	16.73	34	23.43	0.44	624	26.5	0
2014-07-24	10:00:00	2014-07-24 10:00:01	26	16.07	31	20.36	0.493	689	26.5	0
2014-07-24	11:00:00	2014-07-24 11:00:01	26	15.12	29	19.57	0.647	868	26.4	0
2014-07-24	12:00:00	2014-07-24 12:00:01	26	16.29	30	20.98	0.563	783	26.7	0
2014-07-24	13:00:00	2014-07-24 13:00:01	26	14.46	30	20.58	0.514	729	26.9	0
2014-07-24	14:00:00	2014-07-24 14:00:01	26.2	12.96	34	18.57	0.832	1077	27	0
2014-07-24	15:00:00	2014-07-24 15:00:01	26.3	12.63	19	17.51	1.1	1367	27.3	0
2014-07-24	16:00:00	2014-07-24 16:00:01	26.2	12.31	17	18.68	0.874	1111	27.8	0
2014-07-24	17:00:00	2014-07-24 17:00:01	26.2	12.11	14	16.86	0.574	764	28	0
2014-07-24	18:00:00	2014-07-24 18:00:01	26.2	12.46	25	17.54	0.381	528	27.9	0
2014-07-24	19:00:00	2014-07-24 19:00:01	26.1	11.97	29	17.21	0.054	122	27.7	0
2014-07-24	20:00:00	2014-07-24 20:00:01	25.9	10.77	29	15.02	0	0	27.4	0
2014-07-24	21:00:00	2014-07-24 21:00:01	25.9	10.73	38	15.48	0	0	27.3	0
2014-07-24	22:00:00	2014-07-24 22:00:01	25.8	9.73	39	15.04	0	0	26.9	0
2014-07-24	23:00:00	2014-07-24 23:00:01	25.8	10.33	32	13.2	0	0	26.6	0
2014-07-24	1900-01-01	2014-07-25 00:00:01	25.7	9.38	32	14.2	0	0	26.4	0
2014-07-25	01:00:00	2014-07-25 01:00:01	25.7	10.8	24	14.42	0	0	26.4	0
2014-07-25	02:00:00	2014-07-25 02:00:01	25.5	10.99	24	13.98	0	0	26.2	0
2014-07-25	03:00:00	2014-07-25 03:00:01	25.5	9.78	47	13.92	0	0	26	0
2014-07-25	04:00:00	2014-07-25 04:00:01	25.5	11.55	47	15.89	0	0	26.2	0
2014-07-25	05:00:00	2014-07-25 05:00:01	25.3	10.38	45	13.77	0	0	26.1	0
2014-07-25	06:00:00	2014-07-25 06:00:01	25.3	9.66	44	14.4	0	0	26	0
2014-07-25	07:00:00	2014-07-25 07:00:01	25.4	8.3	42	11.92	0.003	47	26.4	0
2014-07-25	08:00:00	2014-07-25 08:00:01	25.4	10.14	34	14.42	0.141	267	26.3	0
2014-07-25	09:00:00	2014-07-25 09:00:01	25.2	10.68	41	20.5	0.384	565	26.3	0
2014-07-25	10:00:00	2014-07-25 10:00:01	25.8	11.01	52	17.58	0.793	1034	26.4	0
2014-07-25	11:00:00	2014-07-25 11:00:01	25.9	9.97	39	15.94	0.875	1129	26.5	0
2014-07-25	12:00:00	2014-07-25 12:00:01	26.2	10.31	63	15.56	1.146	1434	27	0
2014-07-25	13:00:00	2014-07-25 13:00:01	26.2	11.67	53	16.44	0.992	1272	27	0
2014-07-25	14:00:00	2014-07-25 14:00:01	26.2	12.27	32	15.56	0.63	867	27	0
2014-07-25	15:00:00	2014-07-25 15:00:01	26.2	14.08	25	18.28	0.635	869	27	0
2014-07-25	16:00:00	2014-07-25 16:00:01	26.2	13.81	18	18.35	0.444	645	27	0
2014-07-25	17:00:00	2014-07-25 17:00:01	26.1	13.4	21	17.82	0.327	503	27.1	0
2014-07-25	18:00:00	2014-07-25 18:00:01	26.1	12.04	22	16.88	0.173	307	27.2	0
2014-07-25	19:00:00	2014-07-25 19:00:01	26.2	11.22	39	15.54	0.039	100	27.4	0
2014-07-25	20:00:00	2014-07-25 20:00:01	26.1	11.03	39	15.98	0	0	27.4	0
2014-07-25	21:00:00	2014-07-25 21:00:01	26	10.76	35	17.27	0	0	27.3	0
2014-07-25	22:00:00	2014-07-25 22:00:01	25.9	10.96	42	16.26	0	0	27.1	0
2014-07-25	23:00:00	2014-07-25 23:00:01	26	12.65	63	16.53	0	0	27	0
2014-07-25	1900-01-01	2014-07-26 00:00:01	26	11.07	70	16.37	0	0	26.9	0

## Sheet: 2014_Weather
Date	Max Temp (C)	Max Temp Time	Min Temp (C)	Min Temp Time	Avg Temp (C)	Avg Wind Speed (mph)	Max Wind Gust (mph)	Max Gust Dir	Time Of Max Gust	Daily Rainfall (In)	Yearly Rainfall (In)	Total Solar (cal/cm2)	Total Quantum (E/m2)	Max Water Temp	Min Water Temp	Avg Water Temp									*** Daily weather		Temp on Reef Flat	Time, GMT-10:00	Temp, °C()
2014-01-01	26.2	950	21.2	607	23.4	2.82	10.92	72	1156	0	---	227	21	24.6	23.5	24.05												2014-08-20 12:00:00	29.252
2014-01-02	26.6	1146	21.6	0	24.8	7.85	37.57	199	2116	0.8	---	184	18	24.4	23.8	24.1												2014-08-20 13:00:00	29.652
2014-01-03	24.1	1204	20.4	632	22.5	11.83	28.08	336	2227	0.05	---	297	26	24.2	21.5	22.85												2014-08-20 14:00:00	29.552
2014-01-04	23.4	1622	20.7	2142	22.6	15.76	28.91	336	17	0	---	349	30	24.4	21.7	23.05												2014-08-20 15:00:00	29.752
2014-01-05	23	1202	14.9	1718	21.5	10.82	49.45	327	1714	0.78	---	302	27	23.6	21.4	22.5												2014-08-20 16:00:00	30.054
2014-01-06	23.3	1154	21.1	104	22.6	13.21	22.69	29	857	0	---	309	27	23.4	21.2	22.3												2014-08-20 17:00:00	29.552
2014-01-07	23.2	1456	22.1	335	22.7	15.3	23.74	16	806	0	---	287	25	23.2	21.2	22.2												2014-08-20 18:00:00	29.452
2014-01-08	23.4	1045	19.6	1515	22	11.7	26.35	2	1028	0.13	---	175	17	22.9	21.5	22.2												2014-08-20 19:00:00	29.352
2014-01-09	24.7	927	19.5	512	22.4	4.37	15.17	350	2307	0	---	357	31	23.5	22.3	22.9												2014-08-20 20:00:00	29.252
2014-01-10	24	1148	21.9	1354	23.3	8.42	20.34	341	1218	0.14	---	229	22	23.1	22	22.55												2014-08-20 21:00:00	28.953
2014-01-11	27	1007	20.3	645	22.9	2.14	16.31	200	1224	0	---	163	16	23.3	22.5	22.9												2014-08-20 22:00:00	28.853
2014-01-12	27	1658	21.4	726	23.7	2.71	10.37	68	1226	0	---	323	28	24.2	22.7	23.45												2014-08-20 23:00:00	28.853
2014-01-13	28	1155	20.5	2146	23.7	2.38	15.94	195	2226	0.59	---	297	26	24	23.2	23.6												2014-08-21	28.953
2014-01-14	27.4	1434	22.5	2325	24.3	3.92	18.72	200	1403	0.05	---	216	20	24.6	23.5	24.05												2014-08-21 01:00:00	28.754
2014-01-15	27.2	1445	20.6	532	24.1	4.2	22.8	195	1805	0.01	---	292	26	24.2	23.2	23.7												2014-08-21 02:00:00	28.555
2014-01-16	29.3	1217	21.5	2240	24.5	5.84	24.94	316	1842	0	---	319	28	24.8	23.5	24.15												2014-08-21 03:00:00	28.357
2014-01-17	26.6	925	21.1	2346	23	2.03	8.61	87	1442	0.03	---	198	19	24.7	23.7	24.2												2014-08-21 04:00:00	28.258
2014-01-18	25.7	830	20.7	544	23.1	3.21	12.56	329	1818	0	---	323	28	26	23.5	24.75												2014-08-21 05:00:00	27.862
2014-01-19	25.2	907	20.4	639	22.5	4.43	19.95	346	1626	0	---	247	23	24.8	24.1	24.45												2014-08-21 06:00:00	27.665
2014-01-20	25.8	959	20.3	549	22.7	2.58	10.5	72	1455	0	---	289	26	25.3	24	24.65												2014-08-21 07:00:00	27.665
2014-01-21	27.2	957	21.1	2315	24.6	6.05	48.31	203	2225	0.19	---	245	22	24.8	23.9	24.35												2014-08-21 08:00:00	28.159
2014-01-22	26.1	1046	21.8	2329	23.3	10.99	30.78	181	128	0.16	---	366	30	24.2	22.1	23.15												2014-08-21 09:00:00	28.456
2014-01-23	22.4	1436	18.8	2349	21.1	7.56	26.55	332	1	0	---	328	28	24.1	21.8	22.95												2014-08-21 10:00:00	28.456
2014-01-24	24.3	1450	18.4	507	21.6	3.21	13.9	82	1419	0	---	250	22	23.9	22.9	23.4												2014-08-21 11:00:00	28.555
2014-01-25	24.9	1243	20.6	35	23.2	6.82	28.3	195	1529	0	---	311	27	23.5	22.6	23.05												2014-08-21 12:00:00	28.555
2014-01-26	25.4	907	20.2	2341	22.8	8.64	25.49	208	156	0.18	---	83	11	23.2	22.7	22.95												2014-08-21 13:00:00	28.456
2014-01-27	22.1	1336	19.3	1643	20.6	6.55	26.74	334	1525	0.26	---	89	11	23.2	21.7	22.45												2014-08-21 14:00:00	28.754
2014-01-28	22.7	2117	20.1	26	22	18.78	31.37	347	1050	0.13	---	143	15	22.9	21.3	22.1												2014-08-21 15:00:00	28.655
2014-01-29	23.5	1626	19.2	345	22.2	14.83	30.36	19	623	0.35	---	137	15	23	21.6	22.3												2014-08-21 16:00:00	28.754
2014-01-30	24.7	1618	20	515	22.5	3.01	11.77	332	1241	0	---	400	34	24.7	22.4	23.55												2014-08-21 17:00:00	28.655
2014-01-31	27.9	1240	20.8	728	23.3	3.55	16.86	139	1419	0.09	---	238	22	23.9	22.9	23.4												2014-08-21 18:00:00	28.357
2014-02-01	26.9	1631	21.1	2311	24	5.16	27.27	201	847	0.17	---	210	21	23.7	22.9	23.3												2014-08-21 19:00:00	28.159
2014-02-02	25.2	1003	20.5	715	22.5	5	15.94	352	1317	0	---	266	25	23.8	22.9	23.35												2014-08-21 20:00:00	28.159
2014-02-03	23.2	913	19.9	2008	21.4	2.88	19.16	331	1532	0.51	---	41	7	23.7	23.1	23.4												2014-08-21 21:00:00	28.06
2014-02-04	22.7	1321	19.5	1034	20.5	1.97	17.71	326	1023	0.57	---	77	10	23.4	22.9	23.15												2014-08-21 22:00:00	27.961
2014-02-05	26.6	1329	20.2	314	24	6.33	28.89	193	941	0.01	---	194	20	23.7	22.8	23.25												2014-08-21 23:00:00	27.862
2014-02-06	25.5	1331	21.8	257	23.4	4.07	21.59	323	2030	0.04	---	132	14	23.7	22.7	23.2												2014-08-22	27.862
2014-02-07	23.4	1100	20.3	2341	21.9	6.74	23.85	345	2124	0.7	---	52	8	23.6	23.1	23.35												2014-08-22 01:00:00	27.862
2014-02-08	23	1237	19.9	550	21.1	7.2	19.75	29	2114	0.37	---	104	13	23.9	22.5	23.2												2014-08-22 02:00:00	27.764
2014-02-09	24.6	1527	20.4	231	22.9	5.33	15.56	72	1246	0.18	---	259	24	23.9	22.5	23.2												2014-08-22 03:00:00	27.567
2014-02-10	27.9	1214	21.5	3	24.2	2.97	17.43	197	1336	0	---	419	36	24.3	23.4	23.85												2014-08-22 04:00:00	27.468
2014-02-11	26.1	1355	20.6	507	23.5	3.13	11	356	1147	0	---	501	44	25.1	23.8	24.45												2014-08-22 05:00:00	27.37
2014-02-12	25.5	1515	22.1	621	23.7	4.79	15.45	92	1004	0	---	361	33	25.3	24	24.65												2014-08-22 06:00:00	27.173
2014-02-13	25.6	1110	21.4	528	23.6	5.58	24.13	2	2204	0	---	259	24	25.3	24.2	24.75												2014-08-22 07:00:00	27.173
2014-02-14	23.8	1135	22.6	908	23.3	16.93	25.76	12	1840	0.05	---	31	6	24.6	23.2	23.9												2014-08-22 08:00:00	27.272
2014-02-15	24.9	1445	21.6	608	23.8	13.13	27.31	26	101	0.2	---	267	25	24.6	23.2	23.9												2014-08-22 09:00:00	27.665
2014-02-16	25.2	2356	22.1	2243	23.7	4.3	22.4	199	2355	0.2	---	17	5	24.2	23.8	24												2014-08-22 10:00:00	27.862
2014-02-17	27.7	1240	23.1	1746	24.7	5.57	25.05	194	1042	0.08	---	96	11	24.1	23.5	23.8												2014-08-22 11:00:00	28.06
2014-02-18	25.6	906	21.9	707	23.9	4.55	15.17	98	1401	0.86	---	205	20	24.2	23.3	23.75												2014-08-22 12:00:00	28.258
2014-02-19	25.5	1121	21.1	427	23.7	3.84	9.97	64	1409	0	---	316	28	25.2	23.7	24.45												2014-08-22 13:00:00	28.06
2014-02-20	26.5	857	22.7	427	24.2	5.64	15.23	82	1052	0.02	---	381	33	25.3	24.1	24.7												2014-08-22 14:00:00	28.06
2014-02-21	26.7	1011	21.2	657	24.1	4.34	16.13	333	1911	0.36	---	294	27	25.7	24.4	25.05												2014-08-22 15:00:00	28.06
2014-02-22	26.2	843	21.9	705	24.2	4.86	12.06	353	1345	0.03	---	376	33	26.1	24.7	25.4												2014-08-22 16:00:00	27.961
2014-02-23	25.7	841	22.3	617	23.9	7.4	19.6	341	2159	0	---	377	33	25.8	24.7	25.25												2014-08-22 17:00:00	27.862
2014-02-24	23.9	1	20.9	2317	23	10.25	19.79	334	1638	0	---	425	36	25.8	23.6	24.7												2014-08-22 18:00:00	27.764
2014-02-25	22.9	1002	19.5	749	21.5	7.88	20.89	334	1645	0.19	---	254	23	25.4	23.2	24.3												2014-08-22 19:00:00	27.468
2014-02-26	24.1	1006	19.6	307	21.4	9.85	32.31	342	1350	0.1	---	335	29	25.1	22	23.55												2014-08-22 20:00:00	27.37
2014-02-27	23.8	1622	20.7	2340	22.1	7.61	18.96	18	139	0	---	390	33	25	22.7	23.85												2014-08-22 21:00:00	27.272
2014-02-28	26.9	1557	21.1	13	24.5	5.85	18.7	204	1226	0.01	---	314	29	24.7	23.9	24.3												2014-08-22 22:00:00	27.173
2014-03-01	27.2	1605	20.6	458	23.6	4.15	18.35	198	1128	0.4	---	204	20	24.6	24	24.3												2014-08-22 23:00:00	27.173
2014-03-02	22.3	152	20.1	1445	21.1	4.11	21.48	338	1414	0.22	---	43	7	24.4	23.7	24.05												2014-08-23	27.173
2014-03-03	25.4	1354	19.8	2320	21.9	2.17	12.85	321	2002	0	---	249	23	24.3	23.4	23.85												2014-08-23 01:00:00	27.075
2014-03-04	25	922	18.4	632	21.4	5.47	18.43	332	1502	0	---	435	37	24.3	23.4	23.85												2014-08-23 02:00:00	26.781
2014-03-05	25.2	957	19.2	225	21.8	3.18	11.9	15	1412	0	---	405	35	25	23.3	24.15												2014-08-23 03:00:00	26.488
2014-03-06	26.9	1313	19.9	530	23.8	4.3	26.3	207	1125	0.06	---	287	27	24.4	23.4	23.9												2014-08-23 04:00:00	26.488
2014-03-07	29.1	1206	19.8	2359	23.2	4.64	29.96	333	1605	0.6	---	164	18	24.2	23.7	23.95												2014-08-23 05:00:00	26.292
2014-03-08	23.5	1033	19.1	146	21.3	7.92	23.52	33	1505	0.16	---	166	18	24.6	23.2	23.9												2014-08-23 06:00:00	26.292
2014-03-09	24.1	1426	21.3	416	23.3	14.61	22.45	52	19	0.03	---	242	23	24.2	22.9	23.55												2014-08-23 07:00:00	26.292
2014-03-10	24.6	1119	21.4	2108	23.2	7.1	16.07	68	1333	0.05	---	285	27	24.4	23.5	23.95												2014-08-23 08:00:00	26.39
2014-03-11	24.3	941	21.5	220	23.3	7.26	15.59	31	2243	0	---	494	42	24.7	22.7	23.7												2014-08-23 09:00:00	26.879
2014-03-12	24.3	1630	22.5	310	23.6	12.6	20.93	5	1534	0	---	444	39	25.3	22.7	24												2014-08-23 10:00:00	27.173
2014-03-13	24.8	1226	23.1	448	24	12.62	19.82	38	355	0	---	454	39	25.5	22.9	24.2												2014-08-23 11:00:00	27.567
2014-03-14	24.5	1632	20.1	2330	23.5	11.35	23.59	352	2056	0.07	---	299	28	24.9	23.5	24.2												2014-08-23 12:00:00	27.764
2014-03-15	23.7	530	20.2	2	22.1	21.97	36.83	1	1810	0.02	---	176	18	24.5	23	23.75												2014-08-23 13:00:00	28.258
2014-03-16	22.5	1523	20	841	21.6	20.64	32.44	21	1008	0	---	339	30	24.2	22.4	23.3												2014-08-23 14:00:00	28.06
2014-03-17	22.6	1342	20.1	401	21.8	16.64	26.68	35	132	0.01	---	240	23	23.6	21.7	22.65												2014-08-23 15:00:00	28.456
2014-03-18	22.6	1132	20.4	354	21.9	13.29	21.55	25	327	0	---	426	37	23.6	21.6	22.6												2014-08-23 16:00:00	28.655
2014-03-19	23.7	1631	21.1	118	22.9	11.86	19.73	52	59	0	---	452	39	23.4	21.7	22.55												2014-08-23 17:00:00	28.357
2014-03-20	23.8	1615	21.6	301	23	12.19	21.44	7	1309	0	---	401	36	23.6	22.3	22.95												2014-08-23 18:00:00	28.159
2014-03-21	23.5	1243	22.1	446	23.1	13.9	21.83	354	1458	0.02	---	243	23	24	22.4	23.2												2014-08-23 19:00:00	28.06
2014-03-22	23.3	1253	21.4	636	22.9	12.03	18.54	20	738	0	---	217	22	23.7	22.2	22.95												2014-08-23 20:00:00	27.862
2014-03-23	23.4	1241	22.5	2355	22.9	14.48	23.32	11	1624	0	---	293	27	24	22.3	23.15												2014-08-23 21:00:00	27.764
2014-03-24	23.6	1323	22.3	511	23	15.12	24.57	27	1801	0	---	331	30	24.2	22	23.1												2014-08-23 22:00:00	27.665
2014-03-25	24.4	1429	21.6	544	23.5	10.42	20.36	31	1605	0.09	---	430	37	24.2	21.9	23.05												2014-08-23 23:00:00	27.665
2014-03-26	25	1148	22.4	253	24.2	13.03	20.14	63	843	0.16	---	442	39	24.7	23.5	24.1												2014-08-24	27.468
2014-03-27	25.1	1113	22.6	321	24.2	8.02	15.41	29	135	0.03	---	313	29	24.6	23.9	24.25												2014-08-24 01:00:00	27.468
2014-03-28	24.8	1447	20.4	1630	22.7	3.75	21.61	84	310	2.02	---	273	26	25.2	24.2	24.7												2014-08-24 02:00:00	27.272
2014-03-29	24.1	845	20	1938	22.1	6.55	27.55	336	1743	0.46	---	214	26	25	24	24.5												2014-08-24 03:00:00	27.173
2014-03-30	24.6	1343	22.8	233	23.7	11.78	21.28	93	325	0	---	445	39	24.9	23.6	24.25												2014-08-24 04:00:00	26.977
2014-03-31	24.8	1622	23	545	24.1	13.43	23.15	78	741	0.02	---	347	32	24.9	23.9	24.4												2014-08-24 05:00:00	26.879
2014-04-01	25	1252	22.6	1505	24.2	14.16	25.56	57	1500	0.12	---	268	26	24.8	24	24.4												2014-08-24 06:00:00	26.292
2014-04-02	24.8	1232	22.8	1455	24.2	13.82	24.38	60	2008	0.06	---	382	35	24.9	23.6	24.25												2014-08-24 07:00:00	26.195
2014-04-03	24.8	1446	23.6	2135	24.2	16.37	26.02	48	1157	0	---	428	37	25.4	23.5	24.45												2014-08-24 08:00:00	26.781
2014-04-04	24.8	956	23.6	531	24.2	12.64	21	62	130	0	---	393	34	25	23.5	24.25												2014-08-24 09:00:00	27.468
2014-04-05	26.6	859	22	2234	24.1	5.03	16.4	57	34	0.01	---	394	34	25	23.6	24.3												2014-08-24 10:00:00	27.961
2014-04-06	24.1	822	20.8	419	22.6	11.64	26.11	2	1856	0.08	---	446	38	25.3	24.4	24.85												2014-08-24 11:00:00	28.357
2014-04-07	22.9	1225	20.6	1947	22.1	19.67	28.52	354	646	0.16	---	110	13	24.6	23.2	23.9												2014-08-24 12:00:00	28.655
2014-04-08	22.9	1502	21.4	229	22.2	18.98	27.73	9	5	0	---	385	33	24.5	22.8	23.65												2014-08-24 13:00:00	29.053
2014-04-09	22.9	1034	21.7	404	22.3	15.49	25.87	354	16	0	---	428	36	24.1	22.2	23.15												2014-08-24 14:00:00	29.152
2014-04-10	23.4	1332	19.9	754	22.6	10.94	18.28	29	417	0.02	---	156	16	23.6	22.1	22.85												2014-08-24 15:00:00	29.152
2014-04-11	25	821	20.4	2300	22.7	7.94	23.91	343	2146	0	---	208	20	23.7	22	22.85												2014-08-24 16:00:00	29.152
2014-04-12	23.8	1611	20.4	331	22.6	16.99	31.24	18	1943	0.3	---	351	31	23.9	22.4	23.15												2014-08-24 17:00:00	28.953
2014-04-13	24.1	1408	21.9	854	23.3	19.57	30.42	35	1108	0	---	225	22	23.8	22	22.9												2014-08-24 18:00:00	29.053
2014-04-14	23.9	1325	21.6	2118	23.3	18.16	28.65	13	2003	0.01	---	395	33	23.6	21.9	22.75												2014-08-24 19:00:00	29.152
2014-04-15	23.9	1409	20.5	256	23	17.29	31.32	25	244	0.02	---	365	31	23.5	22.1	22.8												2014-08-24 20:00:00	29.053
2014-04-16	24.3	1456	22.1	127	23.6	14.88	23.7	32	1050	0	---	407	34	23.8	22.1	22.95												2014-08-24 21:00:00	28.953
2014-04-17	24.8	1410	21.3	36	23.9	11.51	25.25	52	29	0.08	---	410	35	24.1	22.4	23.25												2014-08-24 22:00:00	28.655
2014-04-18	24.9	1028	22.9	1729	24.1	12.7	22.93	26	1716	0.09	---	357	31	24.4	23	23.7												2014-08-24 23:00:00	28.555
2014-04-19	24.5	1428	22.6	333	23.9	14.27	23.37	50	1650	0	---	274	25	24.4	22.7	23.55												2014-08-25	28.357
2014-04-20	24.4	1025	21.1	1328	23.5	15.53	31.83	29	1326	0.09	---	279	25	24.3	22.8	23.55												2014-08-25 01:00:00	28.258
2014-04-21	24.6	1502	21.8	1206	23.8	16.24	28.47	50	1547	0.14	---	201	20	24.1	23.1	23.6												2014-08-25 02:00:00	28.159
2014-04-22	24.9	1156	22.8	413	24.2	13.98	25.98	48	913	0.01	---	444	37	24.8	23.3	24.05												2014-08-25 03:00:00	27.961
2014-04-23	24.9	1005	23.5	749	24.2	13.37	24.62	26	2027	0	---	289	26	24.7	22.6	23.65												2014-08-25 04:00:00	27.862
2014-04-24	24.8	957	21.8	2226	23.7	14.68	27.49	92	2223	0.18	---	393	33	24.8	22.9	23.85												2014-08-25 05:00:00	27.764
2014-04-25	24.8	1315	22.7	31	24.1	16.85	27.33	27	1603	0	---	275	25	24.7	23.3	24												2014-08-25 06:00:00	27.764
2014-04-26	24.7	1301	21.5	554	23.7	15.3	27.47	69	1439	0.15	---	416	35	24.9	23.3	24.1												2014-08-25 07:00:00	27.764
2014-04-27	24.6	1525	22	750	23.8	10.57	20.34	67	110	0.28	---	159	17	24.4	23.6	24												2014-08-25 08:00:00	27.961
2014-04-28	24.4	1434	21	553	23.3	7.06	18	344	2208	0	---	533	43	25.3	23.4	24.35												2014-08-25 09:00:00	28.06
2014-04-29	24.4	946	22.2	2202	23.5	10.67	21.26	0	445	0	---	325	28	24.9	23.3	24.1												2014-08-25 10:00:00	28.258
2014-04-30	23.4	6	20.7	304	22.7	14.98	24.07	31	1227	0.12	---	236	22	24.5	23	23.75												2014-08-25 11:00:00	28.655
2014-05-01	24.2	2208	22.6	508	23.3	12.43	21.81	43	345	0	---	131	14	24.1	22.8	23.45												2014-08-25 12:00:00	29.053
2014-05-02	24.4	1609	21.5	651	23.6	10.42	19.88	67	1112	0.44	---	200	20	24.3	23.6	23.95												2014-08-25 13:00:00	28.953
2014-05-03	27	946	21.7	550	24.3	5.03	12.87	329	1246	0.12	---	379	32	25.2	24	24.6												2014-08-25 14:00:00	28.953
2014-05-04	25.9	1245	22.5	631	24.5	6.69	14.47	70	1326	0	---	380	32	25.6	24.3	24.95												2014-08-25 15:00:00	28.754
2014-05-05	26.3	1242	23.5	451	24.8	8.44	16.29	75	2209	0	---	432	36	25.9	24.7	25.3												2014-08-25 16:00:00	28.853
2014-05-06	25.5	1017	22.6	441	24.8	10.62	19.66	67	2218	0.06	---	491	40	25.9	24.9	25.4												2014-08-25 17:00:00	28.853
2014-05-07	27.8	1151	23.1	2218	24.5	6.97	17.21	83	738	0.01	---	260	24	26.2	25	25.6												2014-08-25 18:00:00	29.152
2014-05-08	27.4	1343	22.6	445	24.4	2.76	12.67	62	1141	0	---	299	26	25.8	24.8	25.3												2014-08-25 19:00:00	28.853
2014-05-09	26.1	1131	22.6	541	24.8	3.89	11.71	330	1341	0	---	384	32	26.7	25.3	26												2014-08-25 20:00:00	28.853
2014-05-10	26.7	805	23	613	25.1	5.88	15.5	354	1538	0.01	---	576	45	27.3	25.8	26.55												2014-08-25 21:00:00	28.655
2014-05-11	25.5	1229	21.6	2354	24.2	11.22	25.43	354	1901	0.3	---	369	32	27	25.2	26.1												2014-08-25 22:00:00	28.555
2014-05-12	24.3	159	21.5	2325	23.6	15.23	26.9	352	907	0.09	---	162	17	25.8	24.2	25												2014-08-25 23:00:00	28.357
2014-05-13	23.9	146	21.6	357	23.3	12.77	20.19	2	410	0.11	---	159	16	25.2	23.9	24.55												2014-08-26	28.159
2014-05-14	24.3	1713	21.3	326	23.4	9.86	20.39	44	1235	0	---	361	30	25.5	24	24.75												2014-08-26 01:00:00	28.06
2014-05-15	25	1116	23.5	606	24.4	8.41	15.08	332	1447	0	---	501	40	26.1	24.1	25.1												2014-08-26 02:00:00	27.862
2014-05-16	26.3	1016	21.6	418	24.3	7.18	16.31	111	651	0.79	---	506	40	26.6	25.4	26												2014-08-26 03:00:00	27.764
2014-05-17	26.9	1148	22.6	1025	24.6	5.92	20.43	93	1508	0.02	---	279	25	26.5	25.6	26.05												2014-08-26 04:00:00	27.665
2014-05-18	27.1	851	21.9	433	24.4	4.33	13.35	100	1522	0	---	474	38	26.6	25.4	26												2014-08-26 05:00:00	27.665
2014-05-19	27.8	1244	22.4	605	24.7	2.21	16.59	207	1355	0.06	---	267	24	26.3	25	25.65												2014-08-26 06:00:00	27.468
2014-05-20	26.4	737	22.6	356	24.8	5.12	13.42	63	1311	0	---	332	28	26.6	25.2	25.9												2014-08-26 07:00:00	27.37
2014-05-21	26.1	1516	24.3	2354	25.1	9.39	16.13	48	1403	0	---	486	39	26.8	25.8	26.3												2014-08-26 08:00:00	27.468
2014-05-22	26.3	1525	24.1	520	24.9	5.59	15.34	89	958	0.07	---	203	19	26.4	25.8	26.1												2014-08-26 09:00:00	27.764
2014-05-23	29.5	1356	23.9	548	26.2	3.33	15.52	203	1500	0	---	464	38	26.8	25.9	26.35												2014-08-26 10:00:00	28.357
2014-05-24	27.5	1428	22	1037	24.5	2.69	16.16	117	954	1.01	---	194	19	26.8	26.1	26.45												2014-08-26 11:00:00	28.456
2014-05-25	25.7	1344	21.4	127	23.4	2.85	11.42	71	1140	0.31	---	238	22	26.9	26	26.45												2014-08-26 12:00:00	28.953
2014-05-26	25.8	1630	22.1	124	24.3	8.08	21.81	62	943	0.02	---	342	30	26.7	25.5	26.1												2014-08-26 13:00:00	28.953
2014-05-27	25.7	1215	23.6	1940	25.1	12.84	25.65	45	1931	0.01	---	406	33	26.8	24.7	25.75												2014-08-26 14:00:00	28.853
2014-05-28	25.8	1716	24.3	410	25.2	12.66	19.2	60	907	0	---	378	31	26.9	24.9	25.9												2014-08-26 15:00:00	28.853
2014-05-29	25.7	1254	23.7	125	25	11.89	22.14	7	1434	0.01	---	505	39	26.6	25.1	25.85												2014-08-26 16:00:00	28.953
2014-05-30	26	1520	23.6	905	25.2	12.95	21.57	67	856	0.01	---	540	42	26.9	24.8	25.85												2014-08-26 17:00:00	28.853
2014-05-31	25.9	1053	24.6	205	25.3	12.93	18.79	56	1142	0	---	530	41	26.9	26	26.45												2014-08-26 18:00:00	28.754
2014-06-01	26	1408	24.7	2013	25.4	12.22	19.64	75	1042	0.01	---	466	37	26.9	26.1	26.5												2014-08-26 19:00:00	28.953
2014-06-02	26.5	1152	24.8	536	25.5	10.38	16.22	68	1412	0	---	494	39	27.1	25.8	26.45												2014-08-26 20:00:00	28.754
2014-06-03	25.9	927	24.6	527	25.2	9.95	19.6	35	1507	0	---	341	28	27.1	26.1	26.6												2014-08-26 21:00:00	28.555
2014-06-04	25.9	1312	24.3	451	25.3	12.63	21.9	25	1127	0	---	442	35	27.2	25.5	26.35												2014-08-26 22:00:00	28.357
2014-06-05	25.7	1021	23.9	1421	25.2	14.5	24.09	42	1447	0	---	404	33	26.9	24.9	25.9												2014-08-26 23:00:00	28.159
2014-06-06	25.7	1534	22.9	321	24.8	14.53	30.86	41	112	0.04	---	333	28	26.8	24.5	25.65												2014-08-27	28.06
2014-06-07	25.9	1532	24.1	1136	25.2	14.12	23.59	72	1135	0	---	503	39	26.8	25.1	25.95												2014-08-27 01:00:00	27.961
2014-06-08	25.8	1613	23.6	237	25.1	12.81	24.64	64	234	0.02	---	474	37	26.9	25.7	26.3												2014-08-27 02:00:00	27.862
2014-06-09	25.9	805	23.9	339	25.3	11.46	19.82	72	938	0.01	---	423	34	26.9	25.7	26.3												2014-08-27 03:00:00	27.764
2014-06-10	26.2	1806	23.1	800	25.1	7.69	22.31	79	1149	0.14	---	268	24	26.8	25.3	26.05												2014-08-27 04:00:00	27.665
2014-06-11	26.4	1422	24.9	518	25.7	10.75	18.17	67	1756	0	---	446	36	26.9	25.5	26.2												2014-08-27 05:00:00	27.567
2014-06-12	26.4	1212	25.2	505	25.8	13.2	19.64	52	1255	0	---	516	40	26.8	26.2	26.5												2014-08-27 06:00:00	27.37
2014-06-13	26.3	1207	24.9	606	25.6	13.41	21.64	59	1516	0	---	562	43	26.9	26	26.45												2014-08-27 07:00:00	27.37
2014-06-14	26	1307	23.8	2007	25.3	14.76	26.63	42	2005	0.02	---	491	38	26.9	25.3	26.1												2014-08-27 08:00:00	27.764
2014-06-15	25.8	1112	23.8	2205	25.1	14.53	25.56	52	238	0	---	448	35	26.9	24.9	25.9												2014-08-27 09:00:00	27.961
2014-06-16	25.9	1641	23.5	744	25.1	12.76	25.84	27	1729	0	---	525	40	26.8	24.6	25.7												2014-08-27 10:00:00	28.258
2014-06-17	26.2	1319	22.5	421	24.9	12.82	26.9	7	310	0.05	---	488	38	26.9	24.8	25.85												2014-08-27 11:00:00	28.357
2014-06-18	26	1741	23	419	25.3	13.04	23.28	52	415	0.07	---	514	40	26.6	25.7	26.15												2014-08-27 12:00:00	28.853
2014-06-19	25.7	1040	23.4	2237	25.1	13.86	22.53	7	1806	0.02	---	572	43	26.6	24.2	25.4												2014-08-27 13:00:00	28.754
2014-06-20	25.6	1552	21.1	311	24.4	11.37	21.99	351	453	0.21	---	541	41	26.7	24.9	25.8												2014-08-27 14:00:00	28.953
2014-06-21	25.7	1511	22.4	639	24.7	8.77	21.33	13	923	0.04	---	572	43	27	25.5	26.25												2014-08-27 15:00:00	28.853
2014-06-22	26	1525	22.6	722	24.8	9.12	22.4	24	2013	0.1	---	292	25	27	24.6	25.8												2014-08-27 16:00:00	28.655
2014-06-23	25.9	1339	22.6	520	24.9	12.17	23.48	349	2250	0.04	---	559	42	27	25.5	26.25												2014-08-27 17:00:00	28.357
2014-06-24	26.3	1356	23.8	1256	25.4	9.83	23.08	92	811	0.03	---	314	27	27.3	25.8	26.55												2014-08-27 18:00:00	28.258
2014-06-25	26.4	1452	23.1	420	25.4	12.01	22.34	23	1335	0.03	---	510	39	27.1	25.6	26.35												2014-08-27 19:00:00	28.456
2014-06-26	26.2	1322	22.9	456	25.2	13.16	24.09	51	2305	0	---	472	37	27.4	25.1	26.25												2014-08-27 20:00:00	28.357
2014-06-27	26	1131	23.2	2323	24.9	9.97	20.67	73	844	0.21	---	386	31	27.1	26.3	26.7												2014-08-27 21:00:00	28.159
2014-06-28	26.8	1114	23.2	38	25.7	8.88	16.55	6	1938	0.08	---	374	31	27.5	26.3	26.9												2014-08-27 22:00:00	28.06
2014-06-29	26.7	1452	22.5	703	25.1	8.65	18.33	32	2202	0.03	---	344	29	27.9	25.8	26.85												2014-08-27 23:00:00	27.961
2014-06-30	26.6	1454	24.9	516	25.7	10.08	19.6	18	1623	0	---	296	25	27.7	26.2	26.95												2014-08-28	27.764
2014-07-01	26.6	1256	24.7	634	25.8	11.01	18.41	67	628	0	---	478	38	27.8	26.7	27.25												2014-08-28 01:00:00	27.665
2014-07-02	26.6	1126	25.4	8	26	12.04	19.25	47	33	0	---	453	36	27.6	26.9	27.25												2014-08-28 02:00:00	27.567
2014-07-03	26.7	1220	24.4	357	25.9	13.55	22.58	52	1831	0.08	---	481	38	27.8	26	26.9												2014-08-28 03:00:00	27.468
2014-07-04	26.7	1454	25.3	448	26.1	13.65	22.45	13	1609	0	---	420	33	27.7	25.6	26.65												2014-08-28 04:00:00	27.468
2014-07-05	26.2	1243	23.1	651	25.2	11.28	25.56	43	1730	0.11	---	384	31	27.7	25.4	26.55												2014-08-28 05:00:00	27.468
2014-07-06	26.5	1219	23.6	158	25.6	12.44	22.95	85	31	0.09	---	478	37	27.7	25.4	26.55												2014-08-28 06:00:00	27.272
2014-07-07	26.3	1359	22.7	413	25.4	10.95	24.57	65	118	0.04	---	242	22	27.2	26.1	26.65												2014-08-28 07:00:00	27.173
2014-07-08	26.2	1028	24.5	2335	25.6	12.74	21.59	26	1314	0	---	363	30	27.4	25.8	26.6												2014-08-28 08:00:00	27.37
2014-07-09	26.6	1415	23	524	25.5	12.09	23.5	55	1222	0	---	386	31	27.5	25.7	26.6												2014-08-28 09:00:00	27.665
2014-07-10	26.7	1221	23.6	2358	25.9	13.43	26.28	59	2315	0.04	---	462	37	27.4	26	26.7												2014-08-28 10:00:00	27.862
2014-07-11	26.9	852	23.2	611	25.8	13.12	28.28	55	523	0.01	---	264	23	27.1	25.7	26.4												2014-08-28 11:00:00	28.655
2014-07-12	26.7	1305	23.7	2002	25.7	11.2	22.29	72	1955	0.02	---	399	32	27.3	25.8	26.55												2014-08-28 12:00:00	28.953
2014-07-13	26.8	1414	25.2	2006	26.1	10.11	20.28	60	2001	0.01	---	401	33	27.5	26.4	26.95												2014-08-28 13:00:00	28.953
2014-07-14	26.7	1840	24.8	144	26.1	12.42	22.6	47	1254	0.1	---	334	29	27.6	26.6	27.1												2014-08-28 14:00:00	29.452
2014-07-15	26.6	1619	24.7	2136	26	10.88	19.75	23	1724	0.03	---	498	40	27.7	26.1	26.9												2014-08-28 15:00:00	29.352
2014-07-16	26.6	1012	24.6	158	26.1	13.42	24.05	61	153	0.05	---	464	37	27.9	26.3	27.1												2014-08-28 16:00:00	29.053
2014-07-17	26.5	1355	22.8	842	25.5	14.23	27.44	45	838	0.07	---	250	23	27.2	25.6	26.4												2014-08-28 17:00:00	28.655
2014-07-18	26.4	1438	24	136	25.8	12.83	21.22	50	232	0.02	---	402	33	27.3	25.2	26.25												2014-08-28 18:00:00	28.555
2014-07-19	26.6	1452	23.6	2336	25.7	11.66	22.82	50	2108	2.04	---	430	35	27.3	25.8	26.55												2014-08-28 19:00:00	28.456
2014-07-20	26.4	1424	22.1	451	25	12.46	29.94	36	333	3.48	---	317	28	26.8	26.1	26.45												2014-08-28 20:00:00	28.456
2014-07-21	27.3	1432	25	419	26.3	9.95	19.38	66	316	0.07	---	433	35	27.7	26.3	27												2014-08-28 21:00:00	28.555
2014-07-22	27.1	1032	24.7	457	26.1	9.18	20.82	47	1532	0.34	---	317	28	27.9	26.9	27.4												2014-08-28 22:00:00	28.456
2014-07-23	27	1108	25.4	1942	26.2	14.22	25.19	37	1936	0	---	446	36	27.8	26.4	27.1												2014-08-28 23:00:00	28.357
2014-07-24	26.5	1453	25.4	314	25.9	13.49	23.43	35	846	0	---	403	33	28	25.8	26.9												2014-08-29	28.258
2014-07-25	26.5	1330	24.6	837	25.8	11.19	20.5	43	834	0	---	395	33	27.5	25.8	26.65												2014-08-29 01:00:00	28.159
2014-07-26	26.9	1327	24.8	1952	26.1	9.79	18.41	77	2355	0	---	482	38	27.7	26.4	27.05												2014-08-29 02:00:00	28.06
2014-07-27	27.4	1346	26.1	443	26.7	12.64	19.71	77	1	0	---	517	41	28	27.1	27.55												2014-08-29 03:00:00	27.764
2014-07-28	27.2	1506	25.6	510	26.4	10.88	18.57	26	1430	0	---	362	33	28	26.1	27.05												2014-08-29 04:00:00	27.567
2014-07-29	26.9	1013	25.5	544	26.2	10.8	18.7	78	1429	0	---	469	42	28	26.7	27.35												2014-08-29 05:00:00	27.468
2014-07-30	26.8	1149	25.4	557	26.1	11.56	19.79	26	1604	0	---	445	40	27.9	26.3	27.1												2014-08-29 06:00:00	27.468
2014-07-31	27	1539	25.5	536	26.3	11.69	22.27	45	1922	0	---	451	41	28	26.4	27.2												2014-08-29 07:00:00	27.567
2014-08-01	27.2	1106	25.5	2110	26.4	12.45	22.18	59	1950	0	---	355	34	28	26.8	27.4												2014-08-29 08:00:00	27.764
2014-08-02	27.2	1307	24.9	341	26.5	11.21	23.13	72	336	0.09	---	330	33	28	27	27.5												2014-08-29 09:00:00	28.357
2014-08-03	27.4	1509	25.9	511	26.6	12.25	19.77	70	835	0	---	433	40	28.1	27.2	27.65												2014-08-29 10:00:00	28.754
2014-08-04	27.4	1347	25.4	240	26.6	14.45	22.62	65	2110	0	---	450	42	28.1	26.5	27.3												2014-08-29 11:00:00	29.053
2014-08-05	27.1	1155	25.9	624	26.5	14.15	21.99	35	1724	0	---	449	41	28.1	26.5	27.3												2014-08-29 12:00:00	29.552
2014-08-06	26.9	1513	24.5	139	26.1	12.87	23.48	83	608	0.01	---	382	36	28	26.4	27.2												2014-08-29 13:00:00	29.853
2014-08-07	27.2	2317	24	236	26.2	14.24	23.76	18	2101	0.16	---	331	33	27.6	25.9	26.75												2014-08-29 14:00:00	29.953
2014-08-08	27.3	1242	23.3	922	26.5	19.61	36.54	77	937	0.25	---	223	24	27.5	26.6	27.05												2014-08-29 15:00:00	29.752
2014-08-09	27.1	1212	25.7	341	26.5	11.63	20.1	80	42	0.07	---	229	24	27.4	26.5	26.95												2014-08-29 16:00:00	29.352
2014-08-10	26.8	1555	24.8	2345	26.2	7.59	14.12	34	2	0.02	---	452	42	28	26.2	27.1												2014-08-29 17:00:00	29.152
2014-08-11	27.9	809	23.5	604	26	4.78	14.07	337	1231	0	---	448	42	28.3	27	27.65												2014-08-29 18:00:00	29.152
2014-08-12	28.4	724	23.8	2330	26	5.56	15.8	34	1808	0.22	---	302	30	28.5	27.5	28												2014-08-29 19:00:00	28.953
2014-08-13	27.2	1419	23.8	18	26.2	9.8	18.92	76	2258	0.01	---	449	41	28.7	28	28.35												2014-08-29 20:00:00	28.953
2014-08-14	27.2	1343	26	2334	26.5	11.62	19.11	68	913	0	---	436	40	28.4	27.1	27.75												2014-08-29 21:00:00	29.053
2014-08-15	27	957	24.5	459	26.3	13.19	20.67	58	1101	0	---	420	39	28	26.8	27.4												2014-08-29 22:00:00	28.853
2014-08-16	27	1219	23.9	232	26.4	13.3	24.66	60	228	0	---	319	31	27.9	26.1	27												2014-08-29 23:00:00	28.655
2014-08-17	27	1453	24.2	1050	26.3	11.64	22.51	70	1255	0.02	---	234	24	27.8	25.9	26.85												2014-08-30	28.456
2014-08-18	27.1	1210	25.6	447	26.4	11.76	23.34	34	1332	0	---	408	38	27.8	25.5	26.65												2014-08-30 01:00:00	28.258
2014-08-19	26.8	1157	24.1	1804	26	10.14	24.35	30	1027	0.07	---	370	35	28.1	25.7	26.9												2014-08-30 02:00:00	28.258
2014-08-20	27.1	1526	25.7	540	26.4	9.61	18.79	48	2059	0	---	374	35	28	26	27												2014-08-30 03:00:00	28.159
2014-08-21	26.9	1724	24.5	1502	26.1	10.62	20.6	53	1146	0.08	---	183	20	27.6	26.9	27.25												2014-08-30 04:00:00	27.961
2014-08-22	27	1544	24.4	737	26.2	13.44	23.74	11	1426	0.01	---	238	24	27.4	25.5	26.45												2014-08-30 05:00:00	27.862
2014-08-23	27.5	1046	24.9	333	26.3	12.02	22.18	29	937	0	---	401	37	27.8	25.6	26.7												2014-08-30 06:00:00	27.961
2014-08-24	27.3	1424	23.3	430	25.9	7.63	21.31	95	1028	0.14	---	398	37	28.2	26.2	27.2												2014-08-30 07:00:00	28.06
2014-08-25	27.3	1158	23.7	2317	26.2	11.56	24.2	58	2254	0.18	---	350	33	27.7	26.4	27.05												2014-08-30 08:00:00	28.357
2014-08-26	27	1445	23.1	751	25.7	8.76	23.3	16	648	0.62	---	335	31	27.6	26.2	26.9												2014-08-30 09:00:00	28.655
2014-08-27	27.1	1357	25	2359	26.4	11.61	20.45	30	1152	0	---	325	31	27.6	25.9	26.75												2014-08-30 10:00:00	29.152
2014-08-28	27	1530	24.7	608	26.3	9.06	18.48	27	1805	0	---	435	40	27.8	25.9	26.85												2014-08-30 11:00:00	29.452
2014-08-29	27.5	823	24	607	26.2	6.46	16	13	1040	0	---	395	37	27.9	26.9	27.4												2014-08-30 12:00:00	29.853
2014-08-30	27.5	742	23	456	26	6.99	20.76	29	1620	0.2	---	355	34	28.2	27.6	27.9												2014-08-30 13:00:00	30.054
2014-08-31	28	804	23.9	520	26.4	5.16	12.8	82	1520	0	---	379	36	28.5	27.5	28												2014-08-30 14:00:00	30.255
2014-09-01	29.7	811	23.4	2047	26.1	4.58	15.8	61	1508	0.28	---	329	31	28.7	28	28.35												2014-08-30 15:00:00	30.054
2014-09-02	27.9	750	24.1	410	26.3	5.97	13.9	65	2208	0.01	---	355	33	28.9	27.7	28.3												2014-08-30 16:00:00	30.255
2014-09-03	27.4	1346	26	602	26.8	11.09	17.25	13	1550	0	---	423	39	28.6	27.4	28												2014-08-30 17:00:00	29.652
2014-09-04	27.2	1336	25.2	1616	26.4	9	20.08	16	2047	0.01	---	329	32	28.5	26.6	27.55												2014-08-30 18:00:00	29.452
2014-09-05	27.5	1321	24.2	2047	26.2	8.18	18.63	62	429	0.1	---	285	28	28.5	26.6	27.55												2014-08-30 19:00:00	29.152
2014-09-06	27.7	1323	24.2	246	26.4	8.15	18.96	56	846	0.14	---	395	37	28.6	27.2	27.9												2014-08-30 20:00:00	29.053
2014-09-07	28.2	739	24.8	609	26.7	6.78	14.6	38	1903	0	---	418	38	28.8	27.9	28.35												2014-08-30 21:00:00	29.152
2014-09-08	27.4	1027	24.9	2345	26.7	8.36	15.65	47	1212	0.04	---	396	36	28.8	27.5	28.15												2014-08-30 22:00:00	29.352
2014-09-09	27.5	1306	25.8	0	26.8	9.47	16.26	61	2132	0	---	378	35	28.6	27.8	28.2												2014-08-30 23:00:00	29.152
2014-09-10	27.6	1421	26.1	217	26.9	10.37	16.55	37	2146	0	---	403	36	28.8	27.9	28.35												2014-08-31	29.152
2014-09-11	27.7	1204	25.2	2128	26.7	8.59	18.28	56	2120	0.01	---	332	31	28.6	27.8	28.2												2014-08-31 01:00:00	29.053
2014-09-12	28.2	802	24.6	615	26.6	6.74	15.74	56	154	0	---	450	39	28.9	27.8	28.35												2014-08-31 02:00:00	29.053
2014-09-13	28.5	824	24.3	512	26.4	5.26	13	344	1530	0	---	343	31	28.8	27.7	28.25												2014-08-31 03:00:00	28.953
2014-09-14	28.6	839	24	454	26.4	5.04	20.52	339	2044	0.07	---	416	36	29.3	28	28.65												2014-08-31 04:00:00	28.754
2014-09-15	27.9	1217	24.1	345	26.6	6.53	17.08	351	442	0.39	---	378	33	29.3	28.1	28.7												2014-08-31 05:00:00	28.555
2014-09-16	28	1558	24.9	2215	27.1	7.55	21.33	29	2201	0.02	---	350	31	29.3	27.6	28.45												2014-08-31 06:00:00	28.258
2014-09-17	28	1105	24.9	209	26.6	5.36	20.78	13	1728	0.01	---	346	29	29.5	28.8	29.15												2014-08-31 07:00:00	28.159
2014-09-18	28.2	951	24.5	332	26.2	3.63	13.28	136	2016	0.22	---	186	18	29.3	28.9	29.1												2014-08-31 08:00:00	28.456
2014-09-19	29.7	838	24.5	611	26.3	2.87	13.68	349	1329	1.46	---	378	31	29.6	28.4	29												2014-08-31 09:00:00	28.655
2014-09-20	30.2	929	24.4	532	26.9	4.11	13.98	72	1512	0	---	331	30	29.8	28.4	29.1												2014-08-31 10:00:00	29.152
2014-09-21	28.7	844	25.6	639	27.5	7.71	15.78	65	1243	0	---	376	36	29.7	28.8	29.25												2014-08-31 11:00:00	29.352
2014-09-22	28.2	1403	27	445	27.6	10.26	20.87	22	2047	0	---	396	38	29.6	27.8	28.7												2014-08-31 12:00:00	29.752
2014-09-23	28.1	1245	25	313	27.4	12	19.86	16	1356	0.04	---	424	40	29.5	27.6	28.55												2014-08-31 13:00:00	29.953
2014-09-24	28	1633	25.5	2311	27.3	10.17	19.38	26	1948	0.02	---	273	28	29.1	28.1	28.6												2014-08-31 14:00:00	30.255
2014-09-25	28.2	1145	24.6	1730	27	10.96	24.51	68	1609	0.22	---	330	32	29.1	27.7	28.4												2014-08-31 15:00:00	30.356
2014-09-26	28.1	1223	26.5	536	27.3	10.34	18.06	24	1428	0	---	254	26	29.1	28.3	28.7												2014-08-31 16:00:00	30.356
2014-09-27	28.4	1050	26.1	701	27.4	12.07	21.44	85	629	0.02	---	246	25	29	28	28.5												2014-08-31 17:00:00	30.054
2014-09-28	27.9	1034	24.1	2033	26.1	7.32	25.01	44	900	0.06	---	175	20	28.4	26.9	27.65												2014-08-31 18:00:00	29.953
2014-09-29	28.7	1226	25.1	11	26.9	4.64	14.66	18	1814	0	---	325	32	29	27.4	28.2												2014-08-31 19:00:00	29.752
2014-09-30	30.1	921	23.9	624	25.8	2.64	14.51	67	1117	0.71	---	197	21	28.7	28.2	28.45												2014-08-31 20:00:00	29.652
2014-10-01	29	832	24.2	517	26.6	4.22	12.08	72	1650	0.01	---	380	36	29.1	27.9	28.5												2014-08-31 21:00:00	29.452
2014-10-02	28.5	811	25	626	26.9	5.86	15.76	20	1510	0	---	345	33	29.1	27.8	28.45												2014-08-31 22:00:00	29.552
2014-10-03	28	1316	26.1	2030	27.2	9.6	17.51	50	1957	0	---	325	31	28.9	27.8	28.35												2014-08-31 23:00:00	29.752
2014-10-04	28.4	1513	22.8	1905	25.9	5.22	14.66	94	132	0.81	---	301	29	28.6	28.2	28.4												2014-09-01	29.752
2014-10-05	28.5	1111	23.3	521	25.4	2.72	13.37	196	1752	0.1	---	223	22	28.6	27.9	28.25												2014-09-01 01:00:00	29.652
2014-10-06	30.8	1219	24.2	222	27	2.88	16.26	330	1247	0.01	---	314	30	28.5	27.5	28												2014-09-01 02:00:00	29.352
2014-10-07	29.8	1523	25.1	627	26.8	2.45	13.44	63	1057	0	---	162	18	28.5	28	28.25												2014-09-01 03:00:00	29.252
2014-10-08	30.1	828	24.7	326	26.9	5	14.2	10	1632	0	---	323	31	28.9	27.9	28.4												2014-09-01 04:00:00	29.152
2014-10-09	27.8	1137	25.4	204	27.1	9.9	22.97	22	1346	0.01	---	173	19	28.4	27.5	27.95												2014-09-01 05:00:00	29.053
2014-10-10	27.9	1256	25.9	206	27.1	12.95	24.92	24	1249	0.02	---	286	28	28.6	27.4	28												2014-09-01 06:00:00	28.853
2014-10-11	28.1	1522	25.6	154	27.2	13.43	24.88	104	143	0	---	339	32	28.4	27.6	28												2014-09-01 07:00:00	28.853
2014-10-12	27.6	1327	26.5	2350	27.1	12.52	22.82	18	2145	0	---	275	27	28.2	26.5	27.35												2014-09-01 08:00:00	29.053
2014-10-13	27.6	1522	25.6	902	26.8	12.9	22.95	31	2310	0	---	294	28	28.1	26.3	27.2												2014-09-01 09:00:00	29.452
2014-10-14	27.6	1006	25.7	855	26.9	10.92	24.11	49	1515	0.12	---	149	17	27.6	26.5	27.05												2014-09-01 10:00:00	29.752
2014-10-15	27.9	1057	25.2	206	26.8	6.84	17.84	47	48	0.13	---	260	26	27.9	26.8	27.35												2014-09-01 11:00:00	30.054
2014-10-16	27.6	902	25.5	1	27	9.61	19.51	47	525	0	---	369	34	28	27.3	27.65												2014-09-01 12:00:00	30.356
2014-10-17	27.9	2354	24.7	647	27	10.11	21.46	34	2352	0.16	---	242	24	27.9	27.1	27.5												2014-09-01 13:00:00	30.356
2014-10-18	28.5	1136	24.1	1933	26.5	11.34	27.51	129	1146	0.77	---	45	7	27.7	27.2	27.45												2014-09-01 14:00:00	29.953
2014-10-19	26.8	1919	23.4	449	25.5	8.22	20.34	32	1237	2.56	---	0	2	27.4	26.5	26.95												2014-09-01 15:00:00	29.752
2014-10-20	27.6	1209	26.3	17	27	12.94	19.82	47	116	0	---	243	24	27.2	26.5	26.85												2014-09-01 16:00:00	29.853
2014-10-21	27.5	1259	24.9	344	26.8	8.83	16.77	56	2102	0.07	---	298	29	27.5	26.7	27.1												2014-09-01 17:00:00	29.352
2014-10-22	27.3	1044	24.7	1926	26.2	7.26	15.94	76	1657	0.11	---	215	22	27.7	27.2	27.45												2014-09-01 18:00:00	29.452
2014-10-23	27.5	1446	24.8	1923	26.7	9.97	24.18	22	1909	0.02	---	362	33	27.9	26.4	27.15												2014-09-01 19:00:00	29.452
2014-10-24	27.6	1136	24.3	210	26.5	10.5	23.67	62	2	0.01	---	309	29	27.8	26.3	27.05												2014-09-01 20:00:00	29.352
2014-10-25	27.4	1611	24.8	524	26.5	9.92	20.78	81	2237	0	---	273	26	27.7	26.8	27.25												2014-09-01 21:00:00	29.252
2014-10-26	26.9	1449	25.7	6	26.4	10.42	23.19	87	21	0	---	288	27	27.6	26.8	27.2												2014-09-01 22:00:00	29.152
2014-10-27	26.9	1032	24.4	1740	26.3	10.09	19.51	37	1130	0.01	---	214	21	27.5	25.9	26.7												2014-09-01 23:00:00	28.953
2014-10-28	27	1637	23.8	449	26	9.26	20.58	62	1155	0	---	266	25	27.4	25.9	26.65												2014-09-02	28.953
2014-10-29	27	1239	24.5	2201	26.2	11.95	23.7	48	921	0.15	---	235	23	27.3	25.7	26.5												2014-09-02 01:00:00	28.853
2014-10-30	26.9	1008	23.9	203	26.1	13.88	28.08	15	147	0.08	---	174	19	27.2	25.6	26.4												2014-09-02 02:00:00	28.754
2014-10-31	26.8	2000	22.6	1236	25.8	14.73	28.3	46	1224	0.02	---	163	18	26.9	25	25.95												2014-09-02 03:00:00	28.655
2014-11-01	27.3	1154	24	2351	26.5	12.68	20.45	50	1113	0.08	---	337	31	26.9	26	26.45												2014-09-02 04:00:00	28.456
2014-11-02	27.1	1021	23.9	700	26	13.92	24.79	74	409	0.05	---	282	27	27	26.2	26.6												2014-09-02 05:00:00	28.357
2014-11-03	27.1	1256	25.6	132	26.4	10.83	20.14	53	713	0.02	---	199	20	26.7	26.2	26.45												2014-09-02 06:00:00	28.258
2014-11-04	27.2	1058	24.2	637	26.1	7.2	15.69	17	2057	0	---	255	24	26.9	25.7	26.3												2014-09-02 07:00:00	28.456
2014-11-05	26.9	1531	23.3	648	26	11.33	23.94	51	637	0.16	---	258	25	26.9	25.5	26.2												2014-09-02 08:00:00	28.655
2014-11-06	26.9	1354	25.6	545	26.3	9.49	15.26	64	742	0	---	244	23	26.8	26.2	26.5												2014-09-02 09:00:00	28.754
2014-11-07	28	924	22.8	740	25.1	4.04	17.69	334	1835	0.02	---	292	27	27	26.3	26.65												2014-09-02 10:00:00	29.352
2014-11-08	25.6	550	22.6	321	24.5	14.1	27.09	345	502	0.27	---	98	12	26.6	23.5	25.05												2014-09-02 11:00:00	29.352
2014-11-09	25.7	953	20.7	526	23.6	3.99	13.59	18	126	0	---	196	19	26.3	23.7	25												2014-09-02 12:00:00	29.452
2014-11-10	27.3	938	21.3	508	23.7	3.52	15.48	345	1223	0	---	222	21	26.1	25.6	25.85												2014-09-02 13:00:00	29.452
2014-11-11	26.6	859	21.5	2232	23.5	6.26	21.81	25	1901	0.33	---	308	28	26.2	24.9	25.55												2014-09-02 14:00:00	29.752
2014-11-12	26.8	858	21.6	634	24	2.61	11	343	1448	0.14	---	296	27	26.5	25.1	25.8												2014-09-02 15:00:00	29.853
2014-11-13	27.2	907	22.9	624	24.4	2.69	13.02	92	1446	0	---	132	15	26.4	25.8	26.1												2014-09-02 16:00:00	30.255
2014-11-14	28.9	1211	23.4	6	25.9	3.89	14.36	19	1440	0	---	170	17	26.2	25.5	25.85												2014-09-02 17:00:00	29.853
2014-11-15	29.3	1433	21.4	536	25.4	3.66	15.23	176	1341	1.13	---	222	21	27.1	25.8	26.45												2014-09-02 18:00:00	29.752
2014-11-16	25.7	1501	22.4	328	24.9	12.19	22.45	28	424	0.42	---	240	23	26.7	24.5	25.6												2014-09-02 19:00:00	29.552
2014-11-17	25.6	1554	24.7	555	25.1	13.52	21.02	22	1107	0	---	222	21	25.9	23.8	24.85												2014-09-02 20:00:00	29.452
2014-11-18	26.1	1519	24	1928	25.4	14.51	26.24	10	1918	0	---	259	24	25.8	23.8	24.8												2014-09-02 21:00:00	29.752
2014-11-19	26.1	1117	24.9	213	25.6	16.13	26	59	708	0	---	276	25	25.2	23.7	24.45												2014-09-02 22:00:00	29.752
2014-11-20	26.2	1416	24.5	141	25.7	14	23.45	58	400	0	---	132	15	25.2	24.5	24.85												2014-09-02 23:00:00	29.752
2014-11-21	26.2	1045	24.4	526	25.6	10.94	21.33	57	1813	0	---	238	22	25.4	24.5	24.95												2014-09-03	29.452
2014-11-22	26.6	1240	25.1	544	25.8	11.46	21.04	80	1311	0	---	249	23	25.5	24.9	25.2												2014-09-03 01:00:00	29.452
2014-11-23	27.9	904	22	640	25.3	3.34	14.42	205	1548	0	---	235	22	25.7	24.9	25.3												2014-09-03 02:00:00	29.152
2014-11-24	25.5	433	21.3	813	23.5	10.26	30.73	316	639	0.2	---	69	9	25.1	22.8	23.95												2014-09-03 03:00:00	28.953
2014-11-25	24.1	1319	21.6	446	23.2	9.7	26.59	11	2012	0	---	99	11	24.7	22.7	23.7												2014-09-03 04:00:00	28.853
2014-11-26	24.5	1136	23	1919	24	14.41	24.11	26	1340	0	---	181	18	24.6	22.6	23.6												2014-09-03 05:00:00	28.853
2014-11-27	24.6	2251	23.8	514	24.1	17.54	25.71	19	1432	0	---	245	23	24.3	22.9	23.6												2014-09-03 06:00:00	28.754
2014-11-28	25	1128	23.4	641	24.3	16.55	26.63	26	1331	0	---	76	10	23.7	22.3	23												2014-09-03 07:00:00	28.853
2014-11-29	24.4	1356	21.1	2304	23.6	16.19	27.82	39	336	0.05	---	126	14	23.7	22.6	23.15												2014-09-03 08:00:00	29.152
2014-11-30	24.7	1020	21.1	40	23.8	16.47	24.73	26	1556	0.05	---	257	24	23.8	22.3	23.05												2014-09-03 09:00:00	29.352
2014-12-01	24.1	1401	21.6	2114	23.3	16.57	25.98	36	1706	0	---	166	17	23.5	22	22.75												2014-09-03 10:00:00	29.152
2014-12-02	23.9	922	21.4	2103	23	12.53	21.77	60	1959	0.01	---	207	20	23.7	21.6	22.65												2014-09-03 11:00:00	29.652
2014-12-03	22.9	128	20	2122	21.5	8.03	20.82	36	715	0.9	---	67	10	23	22.1	22.55												2014-09-03 12:00:00	29.752
2014-12-04	24	1332	19.9	105	22.6	6.84	17.73	42	1259	0.08	---	71	10	23.2	22.5	22.85												2014-09-03 13:00:00	29.752
2014-12-05	24.7	1132	21.8	539	23.6	7.35	17.97	43	1114	0	---	164	17	23.4	22.4	22.9												2014-09-03 14:00:00	30.154
2014-12-06	24.3	1602	21.1	2359	23.6	7.72	14.36	45	1029	0	---	295	27	23.5	22	22.75												2014-09-03 15:00:00	30.356
2014-12-07	25.7	1002	20.2	551	22.9	3.07	10.72	5	1614	0	---	299	27	25	23.3	24.15												2014-09-03 16:00:00	30.457
2014-12-08	28.2	1108	20.1	637	23.6	2.61	14.55	335	1515	0	---	305	27	24.5	23.9	24.2												2014-09-03 17:00:00	30.054
2014-12-09	26.4	1129	21	159	23.6	2.58	10.78	50	1617	0	---	258	24	25	23.9	24.45												2014-09-03 18:00:00	29.652
2014-12-10	26	903	20.7	602	23.3	7.1	24.07	24	1637	0.02	---	227	22	24.6	23.8	24.2												2014-09-03 19:00:00	29.252
2014-12-11	24.4	15	22.3	1425	24	12.33	20.63	48	1135	0	---	92	11	24.4	23.3	23.85												2014-09-03 20:00:00	29.252
2014-12-12	25.7	1207	21.4	510	23.5	5.9	16.57	56	148	0.08	---	205	20	24.6	23.3	23.95												2014-09-03 21:00:00	29.252
2014-12-13	24.8	1341	22.1	2306	23.9	13.59	23.32	36	2305	0	---	180	18	24.2	22.9	23.55												2014-09-03 22:00:00	29.252
2014-12-14	23.7	2256	21.2	427	22.9	19.06	30.07	10	809	0.09	---	46	7	23.5	22.2	22.85												2014-09-03 23:00:00	29.252
2014-12-15	24.1	1018	21.2	836	23	16.22	28.54	30	215	0	---	152	16	23.5	22.1	22.8												2014-09-04	29.252
2014-12-16	24.8	1146	21.2	157	23.7	14.57	26.57	57	553	0.03	---	197	19	23.4	22.2	22.8												2014-09-04 01:00:00	28.953
2014-12-17	25	1236	22.9	16	24.1	11.57	23.94	40	14	0.01	---	227	22	23.8	22.6	23.2												2014-09-04 02:00:00	28.953
2014-12-18	24.6	1552	22.3	1110	23.9	13.84	25.89	52	1527	0	---	181	18	24	22.8	23.4												2014-09-04 03:00:00	28.754
2014-12-19	25.1	1550	23.6	1218	24.5	13.3	22.14	75	953	0	---	251	23	23.8	23.1	23.45												2014-09-04 04:00:00	28.754
2014-12-20	25.5	1309	23.5	2233	24.6	7.77	17.29	73	5	0	---	233	22	24.1	23.2	23.65												2014-09-04 05:00:00	28.555
2014-12-21	25.8	1628	22.5	528	24	3.37	10.7	58	1342	0.01	---	296	26	24.4	23.5	23.95												2014-09-04 06:00:00	28.555
2014-12-22	23.7	427	20.4	1323	22.3	20.45	36.56	336	1548	0.71	---	32	6	24.2	21.8	23												2014-09-04 07:00:00	28.655
2014-12-23	22.9	1457	20.1	2011	22.3	20.2	29.5	354	2329	0.15	---	122	13	23.2	21.8	22.5												2014-09-04 08:00:00	28.853
2014-12-24	23.5	1205	19.8	152	21.4	3.8	26.96	330	7	0.47	---	150	16	23.3	21.9	22.6												2014-09-04 09:00:00	29.252
2014-12-25	24.5	1538	19	644	21.9	2.41	9.45	78	1303	0	---	283	26	24	23	23.5												2014-09-04 10:00:00	29.352
2014-12-26	24.7	920	20.3	209	22.4	2.71	13.92	328	1842	0	---	205	20	24	23.3	23.65												2014-09-04 11:00:00	29.552
2014-12-27	24	915	20	622	22.1	10.17	27.73	323	1451	0	---	300	26	24	21.8	22.9												2014-09-04 12:00:00	29.752
2014-12-28	23	1618	21.6	321	22.4	11.61	22.29	348	758	0	---	282	25	24.1	21.5	22.8												2014-09-04 13:00:00	29.853
2014-12-29	23.9	1153	19.7	2309	22.2	4.61	11.99	75	1057	0	---	206	19	23.5	22	22.75												2014-09-04 14:00:00	30.255
2014-12-30	25.7	1158	19.4	23	21.3	4.97	30.07	206	1536	0.53	---	144	14	23.2	22.8	23												2014-09-04 15:00:00	30.255
2014-12-31	23.4	1300	18.7	236	20.6	3.65	18.11	330	1041	0	---	257	22	23	21.9	22.45												2014-09-04 16:00:00	30.255
2015-01-01	23.4	1529	18	611	20.4	2.84	14.05	351	1311	0	---	200	18	22.9	21.6	22.25												2014-09-04 17:00:00	29.953
																												2014-09-04 18:00:00	29.853
																												2014-09-04 19:00:00	29.552
																												2014-09-04 20:00:00	29.552
																												2014-09-04 21:00:00	29.552
																												2014-09-04 22:00:00	29.452
																												2014-09-04 23:00:00	29.352
																												2014-09-05	29.352
																												2014-09-05 01:00:00	29.352
																												2014-09-05 02:00:00	29.152
																												2014-09-05 03:00:00	29.053
																												2014-09-05 04:00:00	28.953
																												2014-09-05 05:00:00	28.754
																												2014-09-05 06:00:00	28.357
																												2014-09-05 07:00:00	28.357
																												2014-09-05 08:00:00	29.053
																												2014-09-05 09:00:00	29.252
																												2014-09-05 10:00:00	29.053
																												2014-09-05 11:00:00	29.452
																												2014-09-05 12:00:00	29.652
																												2014-09-05 13:00:00	29.953
																												2014-09-05 14:00:00	30.255
																												2014-09-05 15:00:00	30.457
																												2014-09-05 16:00:00	30.558
																												2014-09-05 17:00:00	30.659
																												2014-09-05 18:00:00	30.457
																												2014-09-05 19:00:00	30.255
																												2014-09-05 20:00:00	30.054
																												2014-09-05 21:00:00	29.752
																												2014-09-05 22:00:00	29.552
																												2014-09-05 23:00:00	29.452
																												2014-09-06	29.352
																												2014-09-06 01:00:00	29.352
																												2014-09-06 02:00:00	29.053
																												2014-09-06 03:00:00	28.953
																												2014-09-06 04:00:00	28.853
																												2014-09-06 05:00:00	28.754
																												2014-09-06 06:00:00	28.456
																												2014-09-06 07:00:00	28.357
																												2014-09-06 08:00:00	28.258
																												2014-09-06 09:00:00	28.258
																												2014-09-06 10:00:00	29.152
																												2014-09-06 11:00:00	29.452
																												2014-09-06 12:00:00	29.752
																												2014-09-06 13:00:00	29.853
																												2014-09-06 14:00:00	30.154
																												2014-09-06 15:00:00	30.356
																												2014-09-06 16:00:00	30.356
																												2014-09-06 17:00:00	30.255
																												2014-09-06 18:00:00	30.255
																												2014-09-06 19:00:00	29.953
																												2014-09-06 20:00:00	29.752
																												2014-09-06 21:00:00	29.853
																												2014-09-06 22:00:00	29.752
																												2014-09-06 23:00:00	29.552
																												2014-09-07	29.452
																												2014-09-07 01:00:00	29.352
																												2014-09-07 02:00:00	29.352
																												2014-09-07 03:00:00	29.053
																												2014-09-07 04:00:00	29.053
																												2014-09-07 05:00:00	28.853
																												2014-09-07 06:00:00	27.665
																												2014-09-07 07:00:00	27.862
																												2014-09-07 08:00:00	28.159
																												2014-09-07 09:00:00	28.953
																												2014-09-07 10:00:00	29.452
																												2014-09-07 11:00:00	29.652
																												2014-09-07 12:00:00	29.853
																												2014-09-07 13:00:00	30.154
																												2014-09-07 14:00:00	30.255
																												2014-09-07 15:00:00	30.356
																												2014-09-07 16:00:00	30.356
																												2014-09-07 17:00:00	30.255
																												2014-09-07 18:00:00	30.154
																												2014-09-07 19:00:00	29.953
																												2014-09-07 20:00:00	29.953
																												2014-09-07 21:00:00	29.853
																												2014-09-07 22:00:00	29.853
																												2014-09-07 23:00:00	29.652
																												2014-09-08	29.352
																												2014-09-08 01:00:00	29.252
																												2014-09-08 02:00:00	29.252
																												2014-09-08 03:00:00	29.252
																												2014-09-08 04:00:00	29.053
																												2014-09-08 05:00:00	29.053
																												2014-09-08 06:00:00	28.853
																												2014-09-08 07:00:00	28.754
																												2014-09-08 08:00:00	28.853
																												2014-09-08 09:00:00	29.152
																												2014-09-08 10:00:00	29.652
																												2014-09-08 11:00:00	29.552
																												2014-09-08 12:00:00	29.552
																												2014-09-08 13:00:00	29.552
																												2014-09-08 14:00:00	29.752
																												2014-09-08 15:00:00	30.054
																												2014-09-08 16:00:00	30.255
																												2014-09-08 17:00:00	29.752
																												2014-09-08 18:00:00	29.953
																												2014-09-08 19:00:00	29.953
																												2014-09-08 20:00:00	29.752
																												2014-09-08 21:00:00	29.252
																												2014-09-08 22:00:00	29.252
																												2014-09-08 23:00:00	29.152
																												2014-09-09	29.053
																												2014-09-09 01:00:00	28.754
																												2014-09-09 02:00:00	28.655
																												2014-09-09 03:00:00	28.754
																												2014-09-09 04:00:00	28.655
																												2014-09-09 05:00:00	28.655
																												2014-09-09 06:00:00	28.555
																												2014-09-09 07:00:00	28.456
																												2014-09-09 08:00:00	28.853
																												2014-09-09 09:00:00	28.853
																												2014-09-09 10:00:00	29.053
																												2014-09-09 11:00:00	29.452
																												2014-09-09 12:00:00	29.652
																												2014-09-09 13:00:00	29.452
																												2014-09-09 14:00:00	29.953
																												2014-09-09 15:00:00	29.752
																												2014-09-09 16:00:00	29.552
																												2014-09-09 17:00:00	29.552
																												2014-09-09 18:00:00	29.652
																												2014-09-09 19:00:00	29.652
																												2014-09-09 20:00:00	29.252
																												2014-09-09 21:00:00	29.252
																												2014-09-09 22:00:00	29.152
																												2014-09-09 23:00:00	28.953
																												2014-09-10	28.853
																												2014-09-10 01:00:00	28.655
																												2014-09-10 02:00:00	28.655
																												2014-09-10 03:00:00	28.655
																												2014-09-10 04:00:00	28.655
																												2014-09-10 05:00:00	28.655
																												2014-09-10 06:00:00	28.555
																												2014-09-10 07:00:00	28.357
																												2014-09-10 08:00:00	28.555
																												2014-09-10 09:00:00	29.152
																												2014-09-10 10:00:00	29.152
																												2014-09-10 11:00:00	29.552
																												2014-09-10 12:00:00	30.054
																												2014-09-10 13:00:00	29.853
																												2014-09-10 14:00:00	29.853
																												2014-09-10 15:00:00	30.054
																												2014-09-10 16:00:00	30.054
																												2014-09-10 17:00:00	29.953
																												2014-09-10 18:00:00	29.752
																												2014-09-10 19:00:00	29.953
																												2014-09-10 20:00:00	29.752
																												2014-09-10 21:00:00	29.452
																												2014-09-10 22:00:00	29.452
																												2014-09-10 23:00:00	29.252
																												2014-09-11	29.152
																												2014-09-11 01:00:00	29.053
																												2014-09-11 02:00:00	28.853
																												2014-09-11 03:00:00	28.853
																												2014-09-11 04:00:00	28.754
																												2014-09-11 05:00:00	28.655
																												2014-09-11 06:00:00	28.853
																												2014-09-11 07:00:00	28.754
																												2014-09-11 08:00:00	29.053
																												2014-09-11 09:00:00	29.152
																												2014-09-11 10:00:00	28.953
																												2014-09-11 11:00:00	29.352
																												2014-09-11 12:00:00	29.652
																												2014-09-11 13:00:00	30.255
																												2014-09-11 14:00:00	30.054
																												2014-09-11 15:00:00	30.154
																												2014-09-11 16:00:00	29.652
																												2014-09-11 17:00:00	29.853
																												2014-09-11 18:00:00	29.853
																												2014-09-11 19:00:00	29.652
																												2014-09-11 20:00:00	29.652
																												2014-09-11 21:00:00	29.352
																												2014-09-11 22:00:00	29.053
																												2014-09-11 23:00:00	29.053
																												2014-09-12	29.252
																												2014-09-12 01:00:00	28.853
																												2014-09-12 02:00:00	28.754
																												2014-09-12 03:00:00	28.655
																												2014-09-12 04:00:00	28.853
																												2014-09-12 05:00:00	28.853
																												2014-09-12 06:00:00	28.853
																												2014-09-12 07:00:00	28.853
																												2014-09-12 08:00:00	29.152
																												2014-09-12 09:00:00	29.552
																												2014-09-12 10:00:00	29.752
																												2014-09-12 11:00:00	29.853
																												2014-09-12 12:00:00	30.356
																												2014-09-12 13:00:00	30.659
																												2014-09-12 14:00:00	30.659
																												2014-09-12 15:00:00	30.76
																												2014-09-12 16:00:00	30.659
																												2014-09-12 17:00:00	30.659
																												2014-09-12 18:00:00	30.255
																												2014-09-12 19:00:00	29.953
																												2014-09-12 20:00:00	29.953
																												2014-09-12 21:00:00	30.054
																												2014-09-12 22:00:00	30.255
																												2014-09-12 23:00:00	29.853
																												2014-09-13	29.452
																												2014-09-13 01:00:00	29.452
																												2014-09-13 02:00:00	29.352
																												2014-09-13 03:00:00	29.352
																												2014-09-13 04:00:00	29.352
																												2014-09-13 05:00:00	29.352
																												2014-09-13 06:00:00	29.252
																												2014-09-13 07:00:00	29.152
																												2014-09-13 08:00:00	29.352
																												2014-09-13 09:00:00	29.853
																												2014-09-13 10:00:00	30.054
																												2014-09-13 11:00:00	30.558
																												2014-09-13 12:00:00	30.558
																												2014-09-13 13:00:00	31.064
																												2014-09-13 14:00:00	31.268
																												2014-09-13 15:00:00	31.268
																												2014-09-13 16:00:00	31.166
																												2014-09-13 17:00:00	30.659
																												2014-09-13 18:00:00	30.457
																												2014-09-13 19:00:00	30.558
																												2014-09-13 20:00:00	30.558
																												2014-09-13 21:00:00	30.255
																												2014-09-13 22:00:00	29.953
																												2014-09-13 23:00:00	30.255
																												2014-09-14	30.154
																												2014-09-14 01:00:00	29.652
																												2014-09-14 02:00:00	29.352
																												2014-09-14 03:00:00	29.252
																												2014-09-14 04:00:00	29.352
																												2014-09-14 05:00:00	29.152
																												2014-09-14 06:00:00	28.953
																												2014-09-14 07:00:00	29.152
																												2014-09-14 08:00:00	29.352
																												2014-09-14 09:00:00	29.452
																												2014-09-14 10:00:00	29.552
																												2014-09-14 11:00:00	29.752
																												2014-09-14 12:00:00	30.356
																												2014-09-14 13:00:00	30.154
																												2014-09-14 14:00:00	30.76
																												2014-09-14 15:00:00	30.457
																												2014-09-14 16:00:00	29.953
																												2014-09-14 17:00:00	29.752
																												2014-09-14 18:00:00	29.652
																												2014-09-14 19:00:00	29.652
																												2014-09-14 20:00:00	30.154
																												2014-09-14 21:00:00	29.752
																												2014-09-14 22:00:00	29.652
																												2014-09-14 23:00:00	29.452
																												2014-09-15	29.652
																												2014-09-15 01:00:00	29.552
																												2014-09-15 02:00:00	29.252
																												2014-09-15 03:00:00	29.152
																												2014-09-15 04:00:00	29.053
																												2014-09-15 05:00:00	28.953
																												2014-09-15 06:00:00	28.754
																												2014-09-15 07:00:00	28.754
																												2014-09-15 08:00:00	29.152
																												2014-09-15 09:00:00	29.452
																												2014-09-15 10:00:00	29.652
																												2014-09-15 11:00:00	29.652
																												2014-09-15 12:00:00	29.953
																												2014-09-15 13:00:00	30.255
																												2014-09-15 14:00:00	30.558
																												2014-09-15 15:00:00	31.166
																												2014-09-15 16:00:00	31.064
																												2014-09-15 17:00:00	31.166
																												2014-09-15 18:00:00	30.659
																												2014-09-15 19:00:00	30.255
																												2014-09-15 20:00:00	30.154
																												2014-09-15 21:00:00	29.953
																												2014-09-15 22:00:00	29.853
																												2014-09-15 23:00:00	29.652
																												2014-09-16	29.652
																												2014-09-16 01:00:00	29.652
																												2014-09-16 02:00:00	29.853
																												2014-09-16 03:00:00	29.552
																												2014-09-16 04:00:00	29.352
																												2014-09-16 05:00:00	29.152
																												2014-09-16 06:00:00	29.053
																												2014-09-16 07:00:00	29.152
																												2014-09-16 08:00:00	29.352
																												2014-09-16 09:00:00	29.752
																												2014-09-16 10:00:00	29.953
																												2014-09-16 11:00:00	30.255
																												2014-09-16 12:00:00	30.457
																												2014-09-16 13:00:00	30.76
																												2014-09-16 14:00:00	30.862
																												2014-09-16 15:00:00	30.76
																												2014-09-16 16:00:00	30.76
																												2014-09-16 17:00:00	30.76
																												2014-09-16 18:00:00	30.457
																												2014-09-16 19:00:00	30.457
																												2014-09-16 20:00:00	30.356
																												2014-09-16 21:00:00	30.154
																												2014-09-16 22:00:00	29.953
																												2014-09-16 23:00:00	29.752
																												2014-09-17	29.853
																												2014-09-17 01:00:00	29.752
																												2014-09-17 02:00:00	29.452
																												2014-09-17 03:00:00	29.452
																												2014-09-17 04:00:00	29.352
																												2014-09-17 05:00:00	29.053
																												2014-09-17 06:00:00	28.953
																												2014-09-17 07:00:00	28.853
																												2014-09-17 08:00:00	29.252
																												2014-09-17 09:00:00	29.552
																												2014-09-17 10:00:00	29.853
																												2014-09-17 11:00:00	30.356
																												2014-09-17 12:00:00	30.659
																												2014-09-17 13:00:00	30.154
																												2014-09-17 14:00:00	30.457
																												2014-09-17 15:00:00	30.558
																												2014-09-17 16:00:00	30.76
																												2014-09-17 17:00:00	30.457
																												2014-09-17 18:00:00	30.356
																												2014-09-17 19:00:00	30.154
																												2014-09-17 20:00:00	29.953
																												2014-09-17 21:00:00	30.255
																												2014-09-17 22:00:00	30.154
																												2014-09-17 23:00:00	30.054
																												2014-09-18	30.054
																												2014-09-18 01:00:00	29.953
																												2014-09-18 02:00:00	29.552
																												2014-09-18 03:00:00	29.552
																												2014-09-18 04:00:00	29.352
																												2014-09-18 05:00:00	29.352
																												2014-09-18 06:00:00	29.352
																												2014-09-18 07:00:00	29.252
																												2014-09-18 08:00:00	29.552
																												2014-09-18 09:00:00	29.352
																												2014-09-18 10:00:00	29.853
																												2014-09-18 11:00:00	29.953
																												2014-09-18 12:00:00	30.255
																												2014-09-18 13:00:00	30.659
																												2014-09-18 14:00:00	30.558
																												2014-09-18 15:00:00	30.659
																												2014-09-18 16:00:00	30.963
																												2014-09-18 17:00:00	30.963
																												2014-09-18 18:00:00	30.659
																												2014-09-18 19:00:00	30.356
																												2014-09-18 20:00:00	30.356
																												2014-09-18 21:00:00	30.356
																												2014-09-18 22:00:00	30.356
																												2014-09-18 23:00:00	30.054
																												2014-09-19	29.953
																												2014-09-19 01:00:00	29.953
																												2014-09-19 02:00:00	29.853
																												2014-09-19 03:00:00	29.853
																												2014-09-19 04:00:00	29.752
																												2014-09-19 05:00:00	29.652
																												2014-09-19 06:00:00	29.452
																												2014-09-19 07:00:00	29.452
																												2014-09-19 08:00:00	29.552
																												2014-09-19 09:00:00	29.853
																												2014-09-19 10:00:00	30.154
																												2014-09-19 11:00:00	30.255
																												2014-09-19 12:00:00	30.659
																												2014-09-19 13:00:00	30.558
																												2014-09-19 14:00:00	30.457
																												2014-09-19 15:00:00	30.255
																												2014-09-19 16:00:00	30.356
																												2014-09-19 17:00:00	30.659
																												2014-09-19 18:00:00	30.255
																												2014-09-19 19:00:00	30.255
																												2014-09-19 20:00:00	30.054
																												2014-09-19 21:00:00	29.953
																												2014-09-19 22:00:00	29.853
																												2014-09-19 23:00:00	29.652
																												2014-09-20	29.652
																												2014-09-20 01:00:00	29.552
																												2014-09-20 02:00:00	29.552
																												2014-09-20 03:00:00	29.552
																												2014-09-20 04:00:00	29.452
																												2014-09-20 05:00:00	29.452
																												2014-09-20 06:00:00	29.452
																												2014-09-20 07:00:00	29.252
																												2014-09-20 08:00:00	29.452
																												2014-09-20 09:00:00	29.853
																												2014-09-20 10:00:00	30.054
																												2014-09-20 11:00:00	30.154
																												2014-09-20 12:00:00	30.457
																												2014-09-20 13:00:00	30.558
																												2014-09-20 14:00:00	30.558
																												2014-09-20 15:00:00	30.659
																												2014-09-20 16:00:00	30.457
																												2014-09-20 17:00:00	30.659
																												2014-09-20 18:00:00	30.457
																												2014-09-20 19:00:00	30.457
																												2014-09-20 20:00:00	30.255
																												2014-09-20 21:00:00	30.255
																												2014-09-20 22:00:00	30.054
																												2014-09-20 23:00:00	29.853
																												2014-09-21	29.752
																												2014-09-21 01:00:00	29.752
																												2014-09-21 02:00:00	29.652
																												2014-09-21 03:00:00	29.552
																												2014-09-21 04:00:00	29.652
																												2014-09-21 05:00:00	29.452
																												2014-09-21 06:00:00	29.252
																												2014-09-21 07:00:00	29.053
																												2014-09-21 08:00:00	28.953
																												2014-09-21 09:00:00	29.352
																												2014-09-21 10:00:00	29.853
																												2014-09-21 11:00:00	30.154
																												2014-09-21 12:00:00	30.356
																												2014-09-21 13:00:00	30.356
																												2014-09-21 14:00:00	30.558
																												2014-09-21 15:00:00	30.154
																												2014-09-21 16:00:00	30.154
																												2014-09-21 17:00:00	30.154
																												2014-09-21 18:00:00	30.255
																												2014-09-21 19:00:00	30.154
																												2014-09-21 20:00:00	29.853
																												2014-09-21 21:00:00	29.953
																												2014-09-21 22:00:00	29.953
																												2014-09-21 23:00:00	29.652
																												2014-09-22	29.652
																												2014-09-22 01:00:00	29.652
																												2014-09-22 02:00:00	29.652
																												2014-09-22 03:00:00	29.652
																												2014-09-22 04:00:00	29.552
																												2014-09-22 05:00:00	29.352
																												2014-09-22 06:00:00	29.252
																												2014-09-22 07:00:00	29.152
																												2014-09-22 08:00:00	29.552
																												2014-09-22 09:00:00	29.853
																												2014-09-22 10:00:00	30.054
																												2014-09-22 11:00:00	30.054
																												2014-09-22 12:00:00	29.953
																												2014-09-22 13:00:00	30.255
																												2014-09-22 14:00:00	30.659
																												2014-09-22 15:00:00	30.659
																												2014-09-22 16:00:00	30.457
																												2014-09-22 17:00:00	30.558
																												2014-09-22 18:00:00	30.356
																												2014-09-22 19:00:00	29.953
																												2014-09-22 20:00:00	29.752
																												2014-09-22 21:00:00	29.752
																												2014-09-22 22:00:00	29.652
																												2014-09-22 23:00:00	29.652
																												2014-09-23	29.552
																												2014-09-23 01:00:00	29.652
																												2014-09-23 02:00:00	29.552
																												2014-09-23 03:00:00	29.552
																												2014-09-23 04:00:00	29.352
																												2014-09-23 05:00:00	29.252
																												2014-09-23 06:00:00	29.252
																												2014-09-23 07:00:00	29.152
																												2014-09-23 08:00:00	29.452
																												2014-09-23 09:00:00	29.452
																												2014-09-23 10:00:00	29.752
																												2014-09-23 11:00:00	30.054
																												2014-09-23 12:00:00	30.255
																												2014-09-23 13:00:00	30.356
																												2014-09-23 14:00:00	30.356
																												2014-09-23 15:00:00	30.255
																												2014-09-23 16:00:00	30.054
																												2014-09-23 17:00:00	30.154
																												2014-09-23 18:00:00	29.853
																												2014-09-23 19:00:00	29.552
																												2014-09-23 20:00:00	29.552
																												2014-09-23 21:00:00	29.552
																												2014-09-23 22:00:00	29.452
																												2014-09-23 23:00:00	29.452
																												2014-09-24	29.252
																												2014-09-24 01:00:00	29.252
																												2014-09-24 02:00:00	29.252
																												2014-09-24 03:00:00	29.252
																												2014-09-24 04:00:00	29.152
																												2014-09-24 05:00:00	29.053
																												2014-09-24 06:00:00	29.053
																												2014-09-24 07:00:00	29.152
																												2014-09-24 08:00:00	29.252
																												2014-09-24 09:00:00	29.652
																												2014-09-24 10:00:00	29.652
																												2014-09-24 11:00:00	29.552
																												2014-09-24 12:00:00	29.853
																												2014-09-24 13:00:00	29.752
																												2014-09-24 14:00:00	30.054
																												2014-09-24 15:00:00	30.255
																												2014-09-24 16:00:00	30.255
																												2014-09-24 17:00:00	29.953
																												2014-09-24 18:00:00	29.953
																												2014-09-24 19:00:00	29.752
																												2014-09-24 20:00:00	29.552
																												2014-09-24 21:00:00	29.652
																												2014-09-24 22:00:00	29.552
																												2014-09-24 23:00:00	29.452
																												2014-09-25	29.352
																												2014-09-25 01:00:00	29.352
																												2014-09-25 02:00:00	29.352
																												2014-09-25 03:00:00	29.152
																												2014-09-25 04:00:00	29.152
																												2014-09-25 05:00:00	29.152
																												2014-09-25 06:00:00	29.053
																												2014-09-25 07:00:00	28.953
																												2014-09-25 08:00:00	29.053
																												2014-09-25 09:00:00	29.252
																												2014-09-25 10:00:00	29.352
																												2014-09-25 11:00:00	29.853
																												2014-09-25 12:00:00	29.853
																												2014-09-25 13:00:00	30.054
																												2014-09-25 14:00:00	30.054
																												2014-09-25 15:00:00	29.652
																												2014-09-25 16:00:00	29.752
																												2014-09-25 17:00:00	29.652
																												2014-09-25 18:00:00	29.552
																												2014-09-25 19:00:00	29.252
																												2014-09-25 20:00:00	29.252
																												2014-09-25 21:00:00	29.152
																												2014-09-25 22:00:00	29.053
																												2014-09-25 23:00:00	28.953
																												2014-09-26	28.853
																												2014-09-26 01:00:00	28.754
																												2014-09-26 02:00:00	28.754
																												2014-09-26 03:00:00	28.655
																												2014-09-26 04:00:00	28.655
																												2014-09-26 05:00:00	28.754
																												2014-09-26 06:00:00	28.853
																												2014-09-26 07:00:00	28.655
																												2014-09-26 08:00:00	28.555
																												2014-09-26 09:00:00	28.953
																												2014-09-26 10:00:00	29.152
																												2014-09-26 11:00:00	29.552
																												2014-09-26 12:00:00	29.853
																												2014-09-26 13:00:00	30.255
																												2014-09-26 14:00:00	30.154
																												2014-09-26 15:00:00	30.255
																												2014-09-26 16:00:00	30.154
																												2014-09-26 17:00:00	29.953
																												2014-09-26 18:00:00	29.752
																												2014-09-26 19:00:00	29.552
																												2014-09-26 20:00:00	29.652
																												2014-09-26 21:00:00	29.352
																												2014-09-26 22:00:00	29.352
																												2014-09-26 23:00:00	29.252
																												2014-09-27	29.252
																												2014-09-27 01:00:00	29.152
																												2014-09-27 02:00:00	29.053
																												2014-09-27 03:00:00	29.053
																												2014-09-27 04:00:00	28.953
																												2014-09-27 05:00:00	28.953
																												2014-09-27 06:00:00	28.953
																												2014-09-27 07:00:00	28.853
																												2014-09-27 08:00:00	28.953
																												2014-09-27 09:00:00	28.853
																												2014-09-27 10:00:00	28.953
																												2014-09-27 11:00:00	29.152
																												2014-09-27 12:00:00	29.452
																												2014-09-27 13:00:00	29.652
																												2014-09-27 14:00:00	29.752
																												2014-09-27 15:00:00	29.552
																												2014-09-27 16:00:00	29.652
																												2014-09-27 17:00:00	29.452
																												2014-09-27 18:00:00	29.252
																												2014-09-27 19:00:00	29.053
																												2014-09-27 20:00:00	28.953
																												2014-09-27 21:00:00	28.853
																												2014-09-27 22:00:00	28.655
																												2014-09-27 23:00:00	28.555
																												2014-09-28	28.655
																												2014-09-28 01:00:00	28.655
																												2014-09-28 02:00:00	28.555
																												2014-09-28 03:00:00	28.555
																												2014-09-28 04:00:00	28.655
																												2014-09-28 05:00:00	28.555
																												2014-09-28 06:00:00	28.456
																												2014-09-28 07:00:00	28.258
																												2014-09-28 08:00:00	28.06
																												2014-09-28 09:00:00	27.862
																												2014-09-28 10:00:00	28.06
																												2014-09-28 11:00:00	28.357
																												2014-09-28 12:00:00	28.555
																												2014-09-28 13:00:00	28.357
																												2014-09-28 14:00:00	28.456
																												2014-09-28 15:00:00	28.258
																												2014-09-28 16:00:00	28.258
																												2014-09-28 17:00:00	28.159
																												2014-09-28 18:00:00	28.06
																												2014-09-28 19:00:00	27.961
																												2014-09-28 20:00:00	27.862
																												2014-09-28 21:00:00	27.862
																												2014-09-28 22:00:00	27.862
																												2014-09-28 23:00:00	27.764
																												2014-09-29	28.258
																												2014-09-29 01:00:00	27.862
																												2014-09-29 02:00:00	27.764
																												2014-09-29 03:00:00	27.862
																												2014-09-29 04:00:00	27.665
																												2014-09-29 05:00:00	27.862
																												2014-09-29 06:00:00	27.961
																												2014-09-29 07:00:00	27.961
																												2014-09-29 08:00:00	28.258
																												2014-09-29 09:00:00	28.159
																												2014-09-29 10:00:00	28.754
																												2014-09-29 11:00:00	28.754
																												2014-09-29 12:00:00	29.152
																												2014-09-29 13:00:00	29.752
																												2014-09-29 14:00:00	29.953
																												2014-09-29 15:00:00	30.054
																												2014-09-29 16:00:00	30.054
																												2014-09-29 17:00:00	30.054
																												2014-09-29 18:00:00	29.853
																												2014-09-29 19:00:00	29.352
																												2014-09-29 20:00:00	29.352
																												2014-09-29 21:00:00	29.552
																												2014-09-29 22:00:00	29.452
																												2014-09-29 23:00:00	29.053
																												2014-09-30	29.152
																												2014-09-30 01:00:00	29.053
																												2014-09-30 02:00:00	28.853
																												2014-09-30 03:00:00	28.754
																												2014-09-30 04:00:00	28.655
																												2014-09-30 05:00:00	28.655
																												2014-09-30 06:00:00	28.555
																												2014-09-30 07:00:00	28.555
																												2014-09-30 08:00:00	28.853
																												2014-09-30 09:00:00	28.853
																												2014-09-30 10:00:00	29.152
																												2014-09-30 11:00:00	29.452
																												2014-09-30 12:00:00	29.053
																												2014-09-30 13:00:00	29.352
																												2014-09-30 14:00:00	29.652
																												2014-09-30 15:00:00	29.752
																												2014-09-30 16:00:00	29.752
																												2014-09-30 17:00:00	29.652
																												2014-09-30 18:00:00	29.452
																												2014-09-30 19:00:00	29.252
																												2014-09-30 20:00:00	29.152
																												2014-09-30 21:00:00	29.053
																												2014-09-30 22:00:00	28.853
																												2014-09-30 23:00:00	28.555
																												2014-10-01	28.357
																												2014-10-01 01:00:00	28.357
																												2014-10-01 02:00:00	28.357
																												2014-10-01 03:00:00	28.159
																												2014-10-01 04:00:00	28.159
																												2014-10-01 05:00:00	28.357
																												2014-10-01 06:00:00	28.357
																												2014-10-01 07:00:00	28.258
																												2014-10-01 08:00:00	28.357
																												2014-10-01 09:00:00	28.555
																												2014-10-01 10:00:00	28.853
																												2014-10-01 11:00:00	28.853
																												2014-10-01 12:00:00	28.953
																												2014-10-01 13:00:00	29.452
																												2014-10-01 14:00:00	29.652
																												2014-10-01 15:00:00	29.552
																												2014-10-01 16:00:00	29.552
																												2014-10-01 17:00:00	29.552
																												2014-10-01 18:00:00	29.452
																												2014-10-01 19:00:00	29.652
																												2014-10-01 20:00:00	29.652
																												2014-10-01 21:00:00	29.652
																												2014-10-01 22:00:00	29.652
																												2014-10-01 23:00:00	29.352
																												2014-10-02	29.252
																												2014-10-02 01:00:00	29.053
																												2014-10-02 02:00:00	29.053
																												2014-10-02 03:00:00	28.853
																												2014-10-02 04:00:00	28.754
																												2014-10-02 05:00:00	28.655
																												2014-10-02 06:00:00	28.555
																												2014-10-02 07:00:00	28.655
																												2014-10-02 08:00:00	28.853
																												2014-10-02 09:00:00	28.953
																												2014-10-02 10:00:00	29.152
																												2014-10-02 11:00:00	29.452
																												2014-10-02 12:00:00	29.552
																												2014-10-02 13:00:00	29.853
																												2014-10-02 14:00:00	30.054
																												2014-10-02 15:00:00	30.356
																												2014-10-02 16:00:00	30.356
																												2014-10-02 17:00:00	30.255
																												2014-10-02 18:00:00	29.953
																												2014-10-02 19:00:00	29.752
																												2014-10-02 20:00:00	29.652
																												2014-10-02 21:00:00	29.752
																												2014-10-02 22:00:00	29.752
																												2014-10-02 23:00:00	29.552
																												2014-10-03	29.352
																												2014-10-03 01:00:00	29.152
																												2014-10-03 02:00:00	29.252
																												2014-10-03 03:00:00	29.053
																												2014-10-03 04:00:00	28.953
																												2014-10-03 05:00:00	28.754
																												2014-10-03 06:00:00	28.754
																												2014-10-03 07:00:00	28.853
																												2014-10-03 08:00:00	28.953
																												2014-10-03 09:00:00	29.152
																												2014-10-03 10:00:00	29.352
																												2014-10-03 11:00:00	29.552
																												2014-10-03 12:00:00	29.452
																												2014-10-03 13:00:00	29.752
																												2014-10-03 14:00:00	29.953
																												2014-10-03 15:00:00	30.154
																												2014-10-03 16:00:00	30.054
																												2014-10-03 17:00:00	29.853
																												2014-10-03 18:00:00	29.552
																												2014-10-03 19:00:00	29.452
																												2014-10-03 20:00:00	29.352
																												2014-10-03 21:00:00	29.252
																												2014-10-03 22:00:00	29.252
																												2014-10-03 23:00:00	29.152
																												2014-10-04	29.252
																												2014-10-04 01:00:00	29.252
																												2014-10-04 02:00:00	29.152
																												2014-10-04 03:00:00	29.053
																												2014-10-04 04:00:00	28.754
																												2014-10-04 05:00:00	28.655
																												2014-10-04 06:00:00	28.555
																												2014-10-04 07:00:00	28.159
																												2014-10-04 08:00:00	28.456
																												2014-10-04 09:00:00	29.053
																												2014-10-04 10:00:00	29.252
																												2014-10-04 11:00:00	28.953
																												2014-10-04 12:00:00	29.053
																												2014-10-04 13:00:00	29.152
																												2014-10-04 14:00:00	29.352
																												2014-10-04 15:00:00	29.652
																												2014-10-04 16:00:00	29.452
																												2014-10-04 17:00:00	29.452
																												2014-10-04 18:00:00	29.152
																												2014-10-04 19:00:00	28.953
																												2014-10-04 20:00:00	28.853
																												2014-10-04 21:00:00	28.853
																												2014-10-04 22:00:00	28.754
																												2014-10-04 23:00:00	28.754
																												2014-10-05	28.754
																												2014-10-05 01:00:00	28.754
																												2014-10-05 02:00:00	28.357
																												2014-10-05 03:00:00	28.159
																												2014-10-05 04:00:00	28.06
																												2014-10-05 05:00:00	28.159
																												2014-10-05 06:00:00	28.06
																												2014-10-05 07:00:00	27.961
																												2014-10-05 08:00:00	28.06
																												2014-10-05 09:00:00	28.754
																												2014-10-05 10:00:00	28.953
																												2014-10-05 11:00:00	29.252
																												2014-10-05 12:00:00	29.152
																												2014-10-05 13:00:00	29.152
																												2014-10-05 14:00:00	29.452
																												2014-10-05 15:00:00	29.152
																												2014-10-05 16:00:00	29.352
																												2014-10-05 17:00:00	29.352
																												2014-10-05 18:00:00	29.452
																												2014-10-05 19:00:00	29.152
																												2014-10-05 20:00:00	29.053
																												2014-10-05 21:00:00	28.853
																												2014-10-05 22:00:00	28.655
																												2014-10-05 23:00:00	28.655
																												2014-10-06	28.555
																												2014-10-06 01:00:00	28.456
																												2014-10-06 02:00:00	28.357
																												2014-10-06 03:00:00	28.357
																												2014-10-06 04:00:00	28.258
																												2014-10-06 05:00:00	28.159
																												2014-10-06 06:00:00	28.06
																												2014-10-06 07:00:00	28.06
																												2014-10-06 08:00:00	28.258
																												2014-10-06 09:00:00	28.655
																												2014-10-06 10:00:00	28.853
																												2014-10-06 11:00:00	29.252
																												2014-10-06 12:00:00	29.552
																												2014-10-06 13:00:00	29.352
																												2014-10-06 14:00:00	29.152
																												2014-10-06 15:00:00	29.352
																												2014-10-06 16:00:00	29.252
																												2014-10-06 17:00:00	29.053
																												2014-10-06 18:00:00	29.252
																												2014-10-06 19:00:00	29.152
																												2014-10-06 20:00:00	28.953
																												2014-10-06 21:00:00	28.853
																												2014-10-06 22:00:00	28.555
																												2014-10-06 23:00:00	28.655
																												2014-10-07	28.655
																												2014-10-07 01:00:00	28.655
																												2014-10-07 02:00:00	28.555
																												2014-10-07 03:00:00	28.456
																												2014-10-07 04:00:00	28.357
																												2014-10-07 05:00:00	28.357
																												2014-10-07 06:00:00	28.357
																												2014-10-07 07:00:00	28.357
																												2014-10-07 08:00:00	28.555
																												2014-10-07 09:00:00	28.953
																												2014-10-07 10:00:00	29.152
																												2014-10-07 11:00:00	29.152
																												2014-10-07 12:00:00	28.953
																												2014-10-07 13:00:00	29.053
																												2014-10-07 14:00:00	28.853
																												2014-10-07 15:00:00	28.853
																												2014-10-07 16:00:00	29.252
																												2014-10-07 17:00:00	29.252
																												2014-10-07 18:00:00	29.053
																												2014-10-07 19:00:00	28.953
																												2014-10-07 20:00:00	28.853
																												2014-10-07 21:00:00	28.655
																												2014-10-07 22:00:00	28.555
																												2014-10-07 23:00:00	28.456
																												2014-10-08	28.357
																												2014-10-08 01:00:00	28.357
																												2014-10-08 02:00:00	28.357
																												2014-10-08 03:00:00	28.258
																												2014-10-08 04:00:00	28.258
																												2014-10-08 05:00:00	28.258
																												2014-10-08 06:00:00	28.159
																												2014-10-08 07:00:00	28.06
																												2014-10-08 08:00:00	28.258
																												2014-10-08 09:00:00	28.555
																												2014-10-08 10:00:00	28.953
																												2014-10-08 11:00:00	29.352
																												2014-10-08 12:00:00	29.352
																												2014-10-08 13:00:00	29.752
																												2014-10-08 14:00:00	29.853
																												2014-10-08 15:00:00	30.054
																												2014-10-08 16:00:00	29.752
																												2014-10-08 17:00:00	29.552
																												2014-10-08 18:00:00	29.752
																												2014-10-08 19:00:00	29.552
																												2014-10-08 20:00:00	29.452
																												2014-10-08 21:00:00	28.953
																												2014-10-08 22:00:00	29.053
																												2014-10-08 23:00:00	29.053
																												2014-10-09	28.853
																												2014-10-09 01:00:00	28.853
																												2014-10-09 02:00:00	28.853
																												2014-10-09 03:00:00	28.754
																												2014-10-09 04:00:00	28.754
																												2014-10-09 05:00:00	28.853
																												2014-10-09 06:00:00	28.555
																												2014-10-09 07:00:00	28.555
																												2014-10-09 08:00:00	28.655
																												2014-10-09 09:00:00	28.853
																												2014-10-09 10:00:00	28.853
																												2014-10-09 11:00:00	29.152
																												2014-10-09 12:00:00	29.452
																												2014-10-09 13:00:00	29.252
																												2014-10-09 14:00:00	29.352
																												2014-10-09 15:00:00	29.352
																												2014-10-09 16:00:00	29.552
																												2014-10-09 17:00:00	29.552
																												2014-10-09 18:00:00	29.352
																												2014-10-09 19:00:00	29.252
																												2014-10-09 20:00:00	28.853
																												2014-10-09 21:00:00	28.953
																												2014-10-09 22:00:00	28.853
																												2014-10-09 23:00:00	28.853
																												2014-10-10	28.754
																												2014-10-10 01:00:00	28.655
																												2014-10-10 02:00:00	28.655
																												2014-10-10 03:00:00	28.555
																												2014-10-10 04:00:00	28.655
																												2014-10-10 05:00:00	28.555
																												2014-10-10 06:00:00	28.456
																												2014-10-10 07:00:00	28.456
																												2014-10-10 08:00:00	28.456
																												2014-10-10 09:00:00	28.456
																												2014-10-10 10:00:00	28.754
																												2014-10-10 11:00:00	28.953
																												2014-10-10 12:00:00	29.152
																												2014-10-10 13:00:00	29.352
																												2014-10-10 14:00:00	29.252
																												2014-10-10 15:00:00	29.053
																												2014-10-10 16:00:00	28.853
																												2014-10-10 17:00:00	28.754
																												2014-10-10 18:00:00	28.655
																												2014-10-10 19:00:00	28.456
																												2014-10-10 20:00:00	28.357
																												2014-10-10 21:00:00	28.357
																												2014-10-10 22:00:00	28.258
																												2014-10-10 23:00:00	28.258
																												2014-10-11	28.258
																												2014-10-11 01:00:00	28.258
																												2014-10-11 02:00:00	28.258
																												2014-10-11 03:00:00	28.159
																												2014-10-11 04:00:00	28.159
																												2014-10-11 05:00:00	28.06
																												2014-10-11 06:00:00	27.961
																												2014-10-11 07:00:00	27.468
																												2014-10-11 08:00:00	27.665
																												2014-10-11 09:00:00	27.764
																												2014-10-11 10:00:00	28.258
																												2014-10-11 11:00:00	28.555
																												2014-10-11 12:00:00	28.754
																												2014-10-11 13:00:00	28.953
																												2014-10-11 14:00:00	29.053
																												2014-10-11 15:00:00	28.853
																												2014-10-11 16:00:00	28.655
																												2014-10-11 17:00:00	28.258
																												2014-10-11 18:00:00	28.06
																												2014-10-11 19:00:00	28.159
																												2014-10-11 20:00:00	28.159
																												2014-10-11 21:00:00	28.159
																												2014-10-11 22:00:00	28.159
																												2014-10-11 23:00:00	28.159
																												2014-10-12	28.06
																												2014-10-12 01:00:00	28.06
																												2014-10-12 02:00:00	28.06
																												2014-10-12 03:00:00	28.06
																												2014-10-12 04:00:00	27.961
																												2014-10-12 05:00:00	27.961
																												2014-10-12 06:00:00	27.961
																												2014-10-12 07:00:00	27.961
																												2014-10-12 08:00:00	27.961
																												2014-10-12 09:00:00	27.862
																												2014-10-12 10:00:00	28.159
																												2014-10-12 11:00:00	28.357
																												2014-10-12 12:00:00	28.655
																												2014-10-12 13:00:00	29.053
																												2014-10-12 14:00:00	28.953
																												2014-10-12 15:00:00	28.953
																												2014-10-12 16:00:00	28.655
																												2014-10-12 17:00:00	28.456
																												2014-10-12 18:00:00	28.258
																												2014-10-12 19:00:00	28.159
																												2014-10-12 20:00:00	28.258
																												2014-10-12 21:00:00	28.159
																												2014-10-12 22:00:00	28.06
																												2014-10-12 23:00:00	27.961
																												2014-10-13	28.06
																												2014-10-13 01:00:00	27.961
																												2014-10-13 02:00:00	27.961
																												2014-10-13 03:00:00	27.961
																												2014-10-13 04:00:00	27.862
																												2014-10-13 05:00:00	27.862
																												2014-10-13 06:00:00	27.764
																												2014-10-13 07:00:00	27.764
																												2014-10-13 08:00:00	27.862
																												2014-10-13 09:00:00	27.862
																												2014-10-13 10:00:00	27.764
																												2014-10-13 11:00:00	27.862
																												2014-10-13 12:00:00	27.862
																												2014-10-13 13:00:00	28.357
																												2014-10-13 14:00:00	28.258
																												2014-10-13 15:00:00	28.555
																												2014-10-13 16:00:00	28.555
																												2014-10-13 17:00:00	28.357
																												2014-10-13 18:00:00	28.159
																												2014-10-13 19:00:00	28.159
																												2014-10-13 20:00:00	28.159
																												2014-10-13 21:00:00	27.862
																												2014-10-13 22:00:00	27.764
																												2014-10-13 23:00:00	27.665
																												2014-10-14	27.665
																												2014-10-14 01:00:00	27.468
																												2014-10-14 02:00:00	27.468
																												2014-10-14 03:00:00	27.665
																												2014-10-14 04:00:00	27.665
																												2014-10-14 05:00:00	27.665
																												2014-10-14 06:00:00	27.665
																												2014-10-14 07:00:00	27.567
																												2014-10-14 08:00:00	27.665
																												2014-10-14 09:00:00	27.665
																												2014-10-14 10:00:00	27.567
																												2014-10-14 11:00:00	27.665
																												2014-10-14 12:00:00	27.862
																												2014-10-14 13:00:00	28.159
																												2014-10-14 14:00:00	28.06
																												2014-10-14 15:00:00	27.862
																												2014-10-14 16:00:00	27.764
																												2014-10-14 17:00:00	27.764
																												2014-10-14 18:00:00	27.862
																												2014-10-14 19:00:00	27.862
																												2014-10-14 20:00:00	27.862
																												2014-10-14 21:00:00	27.764
																												2014-10-14 22:00:00	27.567
																												2014-10-14 23:00:00	27.468
																												2014-10-15	27.37
																												2014-10-15 01:00:00	27.272
																												2014-10-15 02:00:00	27.37
																												2014-10-15 03:00:00	27.567
																												2014-10-15 04:00:00	27.567
																												2014-10-15 05:00:00	27.567
																												2014-10-15 06:00:00	27.567
																												2014-10-15 07:00:00	27.468
																												2014-10-15 08:00:00	27.567
																												2014-10-15 09:00:00	27.764
																												2014-10-15 10:00:00	27.665
																												2014-10-15 11:00:00	27.764
																												2014-10-15 12:00:00	28.258
																												2014-10-15 13:00:00	28.555
																												2014-10-15 14:00:00	28.655
																												2014-10-15 15:00:00	28.853
																												2014-10-15 16:00:00	29.053
																												2014-10-15 17:00:00	29.152
																												2014-10-15 18:00:00	28.655
																												2014-10-15 19:00:00	28.456
																												2014-10-15 20:00:00	28.456
																												2014-10-15 21:00:00	28.456
																												2014-10-15 22:00:00	28.456
																												2014-10-15 23:00:00	28.357
																												2014-10-16	28.06
																												2014-10-16 01:00:00	28.159
																												2014-10-16 02:00:00	28.258
																												2014-10-16 03:00:00	27.961
																												2014-10-16 04:00:00	27.961
																												2014-10-16 05:00:00	27.862
																												2014-10-16 06:00:00	27.862
																												2014-10-16 07:00:00	27.862
																												2014-10-16 08:00:00	27.862
																												2014-10-16 09:00:00	27.961
																												2014-10-16 10:00:00	28.159
																												2014-10-16 11:00:00	28.357
																												2014-10-16 12:00:00	28.655
																												2014-10-16 13:00:00	28.853
																												2014-10-16 14:00:00	29.053
																												2014-10-16 15:00:00	29.252
																												2014-10-16 16:00:00	29.352
																												2014-10-16 17:00:00	29.152
																												2014-10-16 18:00:00	28.853
																												2014-10-16 19:00:00	28.754
																												2014-10-16 20:00:00	28.655
																												2014-10-16 21:00:00	28.456
																												2014-10-16 22:00:00	28.258
																												2014-10-16 23:00:00	28.159
																												2014-10-17	28.06
																												2014-10-17 01:00:00	28.06
																												2014-10-17 02:00:00	27.961
																												2014-10-17 03:00:00	27.961
																												2014-10-17 04:00:00	27.862
																												2014-10-17 05:00:00	27.764
																												2014-10-17 06:00:00	27.764
																												2014-10-17 07:00:00	27.665
																												2014-10-17 08:00:00	27.764
																												2014-10-17 09:00:00	27.862
																												2014-10-17 10:00:00	28.159
																												2014-10-17 11:00:00	28.357
																												2014-10-17 12:00:00	28.655
																												2014-10-17 13:00:00	28.853
																												2014-10-17 14:00:00	28.754
																												2014-10-17 15:00:00	28.853
																												2014-10-17 16:00:00	28.853
																												2014-10-17 17:00:00	28.655
																												2014-10-17 18:00:00	28.456
																												2014-10-17 19:00:00	28.357
																												2014-10-17 20:00:00	28.357
																												2014-10-17 21:00:00	28.258
																												2014-10-17 22:00:00	28.159
																												2014-10-17 23:00:00	28.06
																												2014-10-18	28.159
																												2014-10-18 01:00:00	28.159
																												2014-10-18 02:00:00	28.258
																												2014-10-18 03:00:00	28.159
																												2014-10-18 04:00:00	28.159
																												2014-10-18 05:00:00	28.06
																												2014-10-18 06:00:00	28.06
																												2014-10-18 07:00:00	27.961
																												2014-10-18 08:00:00	28.06
																												2014-10-18 09:00:00	28.159
																												2014-10-18 10:00:00	28.159
																												2014-10-18 11:00:00	28.06
																												2014-10-18 12:00:00	28.06
																												2014-10-18 13:00:00	28.06
																												2014-10-18 14:00:00	28.159
																												2014-10-18 15:00:00	28.06
																												2014-10-18 16:00:00	27.961
																												2014-10-18 17:00:00	27.764
																												2014-10-18 18:00:00	27.567
																												2014-10-18 19:00:00	27.468
																												2014-10-18 20:00:00	27.468
																												2014-10-18 21:00:00	27.37
																												2014-10-18 22:00:00	27.567
																												2014-10-18 23:00:00	27.567
																												2014-10-19	27.075
																												2014-10-19 01:00:00	27.075
																												2014-10-19 02:00:00	27.37
																												2014-10-19 03:00:00	27.37
																												2014-10-19 04:00:00	26.977
																												2014-10-19 05:00:00	26.879
																												2014-10-19 06:00:00	26.683
																												2014-10-19 07:00:00	26.683
																												2014-10-19 08:00:00	26.683
																												2014-10-19 09:00:00	26.977
																												2014-10-19 10:00:00	26.781
																												2014-10-19 11:00:00	26.977
																												2014-10-19 12:00:00	26.977
																												2014-10-19 13:00:00	26.879
																												2014-10-19 14:00:00	26.879
																												2014-10-19 15:00:00	26.879
																												2014-10-19 16:00:00	26.977
																												2014-10-19 17:00:00	26.977
																												2014-10-19 18:00:00	26.781
																												2014-10-19 19:00:00	26.683
																												2014-10-19 20:00:00	26.683
																												2014-10-19 21:00:00	26.585
																												2014-10-19 22:00:00	26.585
																												2014-10-19 23:00:00	26.585
																												2014-10-20	26.488
																												2014-10-20 01:00:00	26.585
																												2014-10-20 02:00:00	26.585
																												2014-10-20 03:00:00	26.488
																												2014-10-20 04:00:00	26.292
																												2014-10-20 05:00:00	26.195
																												2014-10-20 06:00:00	26.097
																												2014-10-20 07:00:00	26.097
																												2014-10-20 08:00:00	26.195
																												2014-10-20 09:00:00	26.488
																												2014-10-20 10:00:00	26.683
																												2014-10-20 11:00:00	26.781
																												2014-10-20 12:00:00	26.977
																												2014-10-20 13:00:00	27.173
																												2014-10-20 14:00:00	27.272
																												2014-10-20 15:00:00	27.37
																												2014-10-20 16:00:00	27.468
																												2014-10-20 17:00:00	27.272
																												2014-10-20 18:00:00	27.173
																												2014-10-20 19:00:00	27.173
																												2014-10-20 20:00:00	26.977
																												2014-10-20 21:00:00	26.879
																												2014-10-20 22:00:00	26.781
																												2014-10-20 23:00:00	26.683
																												2014-10-21	26.781
																												2014-10-21 01:00:00	26.781
																												2014-10-21 02:00:00	26.683
																												2014-10-21 03:00:00	26.683
																												2014-10-21 04:00:00	26.683
																												2014-10-21 05:00:00	26.683
																												2014-10-21 06:00:00	26.781
																												2014-10-21 07:00:00	26.683
																												2014-10-21 08:00:00	26.683
																												2014-10-21 09:00:00	26.781
																												2014-10-21 10:00:00	26.977
																												2014-10-21 11:00:00	27.272
																												2014-10-21 12:00:00	27.37
																												2014-10-21 13:00:00	27.468
																												2014-10-21 14:00:00	27.272
																												2014-10-21 15:00:00	27.272
																												2014-10-21 16:00:00	27.468
																												2014-10-21 17:00:00	27.665
																												2014-10-21 18:00:00	27.567
																												2014-10-21 19:00:00	27.272
																												2014-10-21 20:00:00	27.272
																												2014-10-21 21:00:00	27.272
																												2014-10-21 22:00:00	27.173
																												2014-10-21 23:00:00	27.37
																												2014-10-22	27.272
																												2014-10-22 01:00:00	27.173
																												2014-10-22 02:00:00	27.173
																												2014-10-22 03:00:00	27.173
																												2014-10-22 04:00:00	27.075
																												2014-10-22 05:00:00	26.781
																												2014-10-22 06:00:00	26.781
																												2014-10-22 07:00:00	26.781
																												2014-10-22 08:00:00	26.879
																												2014-10-22 09:00:00	27.173
																												2014-10-22 10:00:00	27.468
																												2014-10-22 11:00:00	27.862
																												2014-10-22 12:00:00	27.665
																												2014-10-22 13:00:00	27.567
																												2014-10-22 14:00:00	27.665
																												2014-10-22 15:00:00	27.468
																												2014-10-22 16:00:00	27.665
																												2014-10-22 17:00:00	27.764
																												2014-10-22 18:00:00	27.567
																												2014-10-22 19:00:00	27.567
																												2014-10-22 20:00:00	27.567
																												2014-10-22 21:00:00	27.468
																												2014-10-22 22:00:00	27.468
																												2014-10-22 23:00:00	27.272
																												2014-10-23	27.272
																												2014-10-23 01:00:00	27.272
																												2014-10-23 02:00:00	26.977
																												2014-10-23 03:00:00	27.173
																												2014-10-23 04:00:00	27.173
																												2014-10-23 05:00:00	26.781
																												2014-10-23 06:00:00	26.879
																												2014-10-23 07:00:00	26.977
																												2014-10-23 08:00:00	26.781
																												2014-10-23 09:00:00	26.879
																												2014-10-23 10:00:00	27.272
																												2014-10-23 11:00:00	27.567
																												2014-10-23 12:00:00	28.159
																												2014-10-23 13:00:00	28.357
																												2014-10-23 14:00:00	28.655
																												2014-10-23 15:00:00	28.655
																												2014-10-23 16:00:00	28.555
																												2014-10-23 17:00:00	28.655
																												2014-10-23 18:00:00	28.555
																												2014-10-23 19:00:00	27.961
																												2014-10-23 20:00:00	27.961
																												2014-10-23 21:00:00	27.862
																												2014-10-23 22:00:00	27.764
																												2014-10-23 23:00:00	27.468
																												2014-10-24	27.37
																												2014-10-24 01:00:00	27.468
																												2014-10-24 02:00:00	27.468
																												2014-10-24 03:00:00	27.37
																												2014-10-24 04:00:00	27.272
																												2014-10-24 05:00:00	27.173
																												2014-10-24 06:00:00	27.075
																												2014-10-24 07:00:00	27.075
																												2014-10-24 08:00:00	26.977
																												2014-10-24 09:00:00	27.173
																												2014-10-24 10:00:00	27.567
																												2014-10-24 11:00:00	27.764
																												2014-10-24 12:00:00	28.06
																												2014-10-24 13:00:00	28.357
																												2014-10-24 14:00:00	28.258
																												2014-10-24 15:00:00	28.258
																												2014-10-24 16:00:00	28.06
																												2014-10-24 17:00:00	28.06
																												2014-10-24 18:00:00	28.06
																												2014-10-24 19:00:00	27.862
																												2014-10-24 20:00:00	27.665
																												2014-10-24 21:00:00	27.567
																												2014-10-24 22:00:00	27.37
																												2014-10-24 23:00:00	27.173
																												2014-10-25	27.075
																												2014-10-25 01:00:00	27.272
																												2014-10-25 02:00:00	27.37
																												2014-10-25 03:00:00	27.272
																												2014-10-25 04:00:00	27.173
																												2014-10-25 05:00:00	27.173
																												2014-10-25 06:00:00	26.879
																												2014-10-25 07:00:00	26.879
																												2014-10-25 08:00:00	26.585
																												2014-10-25 09:00:00	26.977
																												2014-10-25 10:00:00	27.173
																												2014-10-25 11:00:00	27.567
																												2014-10-25 12:00:00	27.567
																												2014-10-25 13:00:00	27.764
																												2014-10-25 14:00:00	27.862
																												2014-10-25 15:00:00	28.06
																												2014-10-25 16:00:00	27.961
																												2014-10-25 17:00:00	27.665
																												2014-10-25 18:00:00	27.665
																												2014-10-25 19:00:00	27.764
																												2014-10-25 20:00:00	27.567
																												2014-10-25 21:00:00	27.468
																												2014-10-25 22:00:00	27.272
																												2014-10-25 23:00:00	27.075
																												2014-10-26	26.977
																												2014-10-26 01:00:00	26.879
																												2014-10-26 02:00:00	26.879
																												2014-10-26 03:00:00	26.879
																												2014-10-26 04:00:00	26.879
																												2014-10-26 05:00:00	26.781
																												2014-10-26 06:00:00	26.683
																												2014-10-26 07:00:00	26.683
																												2014-10-26 08:00:00	26.781
																												2014-10-26 09:00:00	26.879
																												2014-10-26 10:00:00	27.075
																												2014-10-26 11:00:00	27.37
																												2014-10-26 12:00:00	27.567
																												2014-10-26 13:00:00	27.862
																												2014-10-26 14:00:00	28.159
																												2014-10-26 15:00:00	28.357
																												2014-10-26 16:00:00	28.555
																												2014-10-26 17:00:00	28.555
																												2014-10-26 18:00:00	28.357
																												2014-10-26 19:00:00	27.961
																												2014-10-26 20:00:00	27.764
																												2014-10-26 21:00:00	27.665
																												2014-10-26 22:00:00	27.567
																												2014-10-26 23:00:00	27.37
																												2014-10-27	27.272
																												2014-10-27 01:00:00	27.173
																												2014-10-27 02:00:00	27.173
																												2014-10-27 03:00:00	27.272
																												2014-10-27 04:00:00	27.075
																												2014-10-27 05:00:00	26.977
																												2014-10-27 06:00:00	26.879
																												2014-10-27 07:00:00	26.879
																												2014-10-27 08:00:00	26.879
																												2014-10-27 09:00:00	26.879
																												2014-10-27 10:00:00	27.173
																												2014-10-27 11:00:00	27.272
																												2014-10-27 12:00:00	27.37
																												2014-10-27 13:00:00	27.272
																												2014-10-27 14:00:00	27.468
																												2014-10-27 15:00:00	27.665
																												2014-10-27 16:00:00	27.468
																												2014-10-27 17:00:00	27.37
																												2014-10-27 18:00:00	27.665
																												2014-10-27 19:00:00	27.567
																												2014-10-27 20:00:00	27.173
																												2014-10-27 21:00:00	26.977
																												2014-10-27 22:00:00	26.977
																												2014-10-27 23:00:00	26.879
																												2014-10-28	26.879
																												2014-10-28 01:00:00	26.781
																												2014-10-28 02:00:00	26.683
																												2014-10-28 03:00:00	26.488
																												2014-10-28 04:00:00	26.879
																												2014-10-28 05:00:00	27.272
																												2014-10-28 06:00:00	27.272
																												2014-10-28 07:00:00	27.272
																												2014-10-28 08:00:00	26.977
																												2014-10-28 09:00:00	27.075
																												2014-10-28 10:00:00	27.272
																												2014-10-28 11:00:00	27.764
																												2014-10-28 12:00:00	27.961
																												2014-10-28 13:00:00	27.961
																												2014-10-28 14:00:00	28.357
																												2014-10-28 15:00:00	28.258
																												2014-10-28 16:00:00	27.961
																												2014-10-28 17:00:00	27.764
																												2014-10-28 18:00:00	27.764
																												2014-10-28 19:00:00	27.665
																												2014-10-28 20:00:00	27.665
																												2014-10-28 21:00:00	27.764
																												2014-10-28 22:00:00	27.665
																												2014-10-28 23:00:00	27.468
																												2014-10-29	27.468
																												2014-10-29 01:00:00	27.272
																												2014-10-29 02:00:00	27.075
																												2014-10-29 03:00:00	27.075
																												2014-10-29 04:00:00	27.075
																												2014-10-29 05:00:00	26.879
																												2014-10-29 06:00:00	26.781
																												2014-10-29 07:00:00	27.075
																												2014-10-29 08:00:00	27.075
																												2014-10-29 09:00:00	27.075
																												2014-10-29 10:00:00	26.977
																												2014-10-29 11:00:00	27.272
																												2014-10-29 12:00:00	27.37
																												2014-10-29 13:00:00	27.764
																												2014-10-29 14:00:00	27.961
																												2014-10-29 15:00:00	27.567
																												2014-10-29 16:00:00	27.567
																												2014-10-29 17:00:00	27.468
																												2014-10-29 18:00:00	27.37
																												2014-10-29 19:00:00	27.272
																												2014-10-29 20:00:00	27.37
																												2014-10-29 21:00:00	27.173
																												2014-10-29 22:00:00	27.075
																												2014-10-29 23:00:00	27.075
																												2014-10-30	27.075
																												2014-10-30 01:00:00	26.879
																												2014-10-30 02:00:00	26.683
																												2014-10-30 03:00:00	26.585
																												2014-10-30 04:00:00	26.585
																												2014-10-30 05:00:00	26.488
																												2014-10-30 06:00:00	26.585
																												2014-10-30 07:00:00	26.488
																												2014-10-30 08:00:00	26.585
																												2014-10-30 09:00:00	26.879
																												2014-10-30 10:00:00	26.879
																												2014-10-30 11:00:00	26.879
																												2014-10-30 12:00:00	26.977
																												2014-10-30 13:00:00	27.075
																												2014-10-30 14:00:00	27.173
																												2014-10-30 15:00:00	27.173
																												2014-10-30 16:00:00	26.977
																												2014-10-30 17:00:00	26.781
																												2014-10-30 18:00:00	26.683
																												2014-10-30 19:00:00	26.585
																												2014-10-30 20:00:00	26.39
																												2014-10-30 21:00:00	26.39
																												2014-10-30 22:00:00	26.39
																												2014-10-30 23:00:00	26.292
																												2014-10-31	26.195
																												2014-10-31 01:00:00	26.195
																												2014-10-31 02:00:00	26.195
																												2014-10-31 03:00:00	26
																												2014-10-31 04:00:00	26.195
																												2014-10-31 05:00:00	26.195
																												2014-10-31 06:00:00	26
																												2014-10-31 07:00:00	26
																												2014-10-31 08:00:00	26.097
																												2014-10-31 09:00:00	26.39
																												2014-10-31 10:00:00	26.39
																												2014-10-31 11:00:00	26.39
																												2014-10-31 12:00:00	26.488
																												2014-10-31 13:00:00	26.39
																												2014-10-31 14:00:00	26.488
																												2014-10-31 15:00:00	26.585
																												2014-10-31 16:00:00	26.683
																												2014-10-31 17:00:00	26.488
																												2014-10-31 18:00:00	26.488
																												2014-10-31 19:00:00	26.488
																												2014-10-31 20:00:00	26.292
																												2014-10-31 21:00:00	26.292
																												2014-10-31 22:00:00	26.195
																												2014-10-31 23:00:00	26.195
																												2014-11-01	26.195
																												2014-11-01 01:00:00	26.195
																												2014-11-01 02:00:00	26
																												2014-11-01 03:00:00	25.805
																												2014-11-01 04:00:00	25.805
																												2014-11-01 05:00:00	25.805
																												2014-11-01 06:00:00	26
																												2014-11-01 07:00:00	26.097
																												2014-11-01 08:00:00	26.097
																												2014-11-01 09:00:00	26.195
																												2014-11-01 10:00:00	26.585
																												2014-11-01 11:00:00	26.879
																												2014-11-01 12:00:00	26.879
																												2014-11-01 13:00:00	26.879
																												2014-11-01 14:00:00	27.173
																												2014-11-01 15:00:00	27.173
																												2014-11-01 16:00:00	27.37
																												2014-11-01 17:00:00	27.075
																												2014-11-01 18:00:00	26.781
																												2014-11-01 19:00:00	26.781
																												2014-11-01 20:00:00	26.683
																												2014-11-01 21:00:00	26.585
																												2014-11-01 22:00:00	26.585
																												2014-11-01 23:00:00	26.585
																												2014-11-02	26.488
																												2014-11-02 01:00:00	26.488
																												2014-11-02 02:00:00	26.39
																												2014-11-02 03:00:00	26.292
																												2014-11-02 04:00:00	26.292
																												2014-11-02 05:00:00	26
																												2014-11-02 06:00:00	26
																												2014-11-02 07:00:00	26.195
																												2014-11-02 08:00:00	26.195
																												2014-11-02 09:00:00	26.39
																												2014-11-02 10:00:00	26.683
																												2014-11-02 11:00:00	26.879
																												2014-11-02 12:00:00	26.977
																												2014-11-02 13:00:00	26.977
																												2014-11-02 14:00:00	27.075
																												2014-11-02 15:00:00	27.173
																												2014-11-02 16:00:00	26.879
																												2014-11-02 17:00:00	26.781
																												2014-11-02 18:00:00	26.781
																												2014-11-02 19:00:00	26.683
																												2014-11-02 20:00:00	26.683
																												2014-11-02 21:00:00	26.585
																												2014-11-02 22:00:00	26.585
																												2014-11-02 23:00:00	26.585
																												2014-11-03	26.585
																												2014-11-03 01:00:00	26.488
																												2014-11-03 02:00:00	26.488
																												2014-11-03 03:00:00	26.39
																												2014-11-03 04:00:00	26.292
																												2014-11-03 05:00:00	26.195
																												2014-11-03 06:00:00	26.195
																												2014-11-03 07:00:00	26.292
																												2014-11-03 08:00:00	26.39
																												2014-11-03 09:00:00	26.488
																												2014-11-03 10:00:00	26.488
																												2014-11-03 11:00:00	26.683
																												2014-11-03 12:00:00	26.585
																												2014-11-03 13:00:00	26.977
																												2014-11-03 14:00:00	27.272
																												2014-11-03 15:00:00	27.272
																												2014-11-03 16:00:00	26.977
																												2014-11-03 17:00:00	26.879
																												2014-11-03 18:00:00	26.781
																												2014-11-03 19:00:00	26.683
																												2014-11-03 20:00:00	26.585
																												2014-11-03 21:00:00	26.585
																												2014-11-03 22:00:00	26.585
																												2014-11-03 23:00:00	26.488
																												2014-11-04	26.683
																												2014-11-04 01:00:00	26.683
																												2014-11-04 02:00:00	26.585
																												2014-11-04 03:00:00	26.488
																												2014-11-04 04:00:00	26.39
																												2014-11-04 05:00:00	26.39
																												2014-11-04 06:00:00	26.292
																												2014-11-04 07:00:00	26.195
																												2014-11-04 08:00:00	26
																												2014-11-04 09:00:00	26.195
																												2014-11-04 10:00:00	26.683
																												2014-11-04 11:00:00	27.173
																												2014-11-04 12:00:00	27.567
																												2014-11-04 13:00:00	27.862
																												2014-11-04 14:00:00	27.961
																												2014-11-04 15:00:00	28.159
																												2014-11-04 16:00:00	28.06
																												2014-11-04 17:00:00	27.961
																												2014-11-04 18:00:00	27.764
																												2014-11-04 19:00:00	27.764
																												2014-11-04 20:00:00	27.862
																												2014-11-04 21:00:00	27.665
																												2014-11-04 22:00:00	27.567
																												2014-11-04 23:00:00	27.272
																												2014-11-05	27.173
																												2014-11-05 01:00:00	27.075
																												2014-11-05 02:00:00	26.977
																												2014-11-05 03:00:00	26.879
																												2014-11-05 04:00:00	26.977
																												2014-11-05 05:00:00	26.879
																												2014-11-05 06:00:00	26.879
																												2014-11-05 07:00:00	26.781
																												2014-11-05 08:00:00	26.781
																												2014-11-05 09:00:00	26.781
																												2014-11-05 10:00:00	26.879
																												2014-11-05 11:00:00	26.977
																												2014-11-05 12:00:00	27.272
																												2014-11-05 13:00:00	27.37
																												2014-11-05 14:00:00	27.37
																												2014-11-05 15:00:00	27.567
																												2014-11-05 16:00:00	27.665
																												2014-11-05 17:00:00	27.37
																												2014-11-05 18:00:00	27.075
																												2014-11-05 19:00:00	26.977
																												2014-11-05 20:00:00	27.075
																												2014-11-05 21:00:00	26.977
																												2014-11-05 22:00:00	26.879
																												2014-11-05 23:00:00	26.781
																												2014-11-06	26.683
																												2014-11-06 01:00:00	26.781
																												2014-11-06 02:00:00	26.683
																												2014-11-06 03:00:00	26.585
																												2014-11-06 04:00:00	26.585
																												2014-11-06 05:00:00	26.292
																												2014-11-06 06:00:00	26.292
																												2014-11-06 07:00:00	26.292
																												2014-11-06 08:00:00	26.292
																												2014-11-06 09:00:00	26.292
																												2014-11-06 10:00:00	26.488
																												2014-11-06 11:00:00	26.488
																												2014-11-06 12:00:00	26.683
																												2014-11-06 13:00:00	26.879
																												2014-11-06 14:00:00	27.173
																												2014-11-06 15:00:00	27.272
																												2014-11-06 16:00:00	27.075
																												2014-11-06 17:00:00	26.781
																												2014-11-06 18:00:00	26.683
																												2014-11-06 19:00:00	26.683
																												2014-11-06 20:00:00	26.585
																												2014-11-06 21:00:00	26.585
																												2014-11-06 22:00:00	26.585
																												2014-11-06 23:00:00	26.488
																												2014-11-07	26.585
																												2014-11-07 01:00:00	26.585
																												2014-11-07 02:00:00	26.683
																												2014-11-07 03:00:00	26.683
																												2014-11-07 04:00:00	26.585
																												2014-11-07 05:00:00	26.585
																												2014-11-07 06:00:00	26.488
																												2014-11-07 07:00:00	26.195
																												2014-11-07 08:00:00	26.292
																												2014-11-07 09:00:00	26.488
																												2014-11-07 10:00:00	26.879
																												2014-11-07 11:00:00	27.37
																												2014-11-07 12:00:00	27.862
																												2014-11-07 13:00:00	27.665
																												2014-11-07 14:00:00	27.665
																												2014-11-07 15:00:00	27.665
																												2014-11-07 16:00:00	27.567
																												2014-11-07 17:00:00	27.468
																												2014-11-07 18:00:00	27.37
																												2014-11-07 19:00:00	27.272
																												2014-11-07 20:00:00	27.37
																												2014-11-07 21:00:00	27.272
																												2014-11-07 22:00:00	27.173
																												2014-11-07 23:00:00	26.977
																												2014-11-08	26.879
																												2014-11-08 01:00:00	26.879
																												2014-11-08 02:00:00	26.977
																												2014-11-08 03:00:00	26.879
																												2014-11-08 04:00:00	26.781
																												2014-11-08 05:00:00	26.781
																												2014-11-08 06:00:00	26.683
																												2014-11-08 07:00:00	26.488
																												2014-11-08 08:00:00	26.488
																												2014-11-08 09:00:00	26.488
																												2014-11-08 10:00:00	26.488
																												2014-11-08 11:00:00	26.488
																												2014-11-08 12:00:00	26.585
																												2014-11-08 13:00:00	26.683
																												2014-11-08 14:00:00	26.488
																												2014-11-08 15:00:00	26.488
																												2014-11-08 16:00:00	26.488
																												2014-11-08 17:00:00	26.39
																												2014-11-08 18:00:00	26.39
																												2014-11-08 19:00:00	26.195
																												2014-11-08 20:00:00	25.61
																												2014-11-08 21:00:00	25.708
																												2014-11-08 22:00:00	25.708
																												2014-11-08 23:00:00	25.805
																												2014-11-09	25.805
																												2014-11-09 01:00:00	25.513
																												2014-11-09 02:00:00	25.708
																												2014-11-09 03:00:00	25.416
																												2014-11-09 04:00:00	25.028
																												2014-11-09 05:00:00	24.931
																												2014-11-09 06:00:00	24.835
																												2014-11-09 07:00:00	23.869
																												2014-11-09 08:00:00	24.448
																												2014-11-09 09:00:00	24.545
																												2014-11-09 10:00:00	24.931
																												2014-11-09 11:00:00	25.902
																												2014-11-09 12:00:00	26.585
																												2014-11-09 13:00:00	26.781
																												2014-11-09 14:00:00	26.879
																												2014-11-09 15:00:00	26.781
																												2014-11-09 16:00:00	26.585
																												2014-11-09 17:00:00	26.488
																												2014-11-09 18:00:00	26.292
																												2014-11-09 19:00:00	26.195
																												2014-11-09 20:00:00	26
																												2014-11-09 21:00:00	25.902
																												2014-11-09 22:00:00	25.805
																												2014-11-09 23:00:00	25.902
																												2014-11-10	25.902
																												2014-11-10 01:00:00	25.708
																												2014-11-10 02:00:00	25.513
																												2014-11-10 03:00:00	25.513
																												2014-11-10 04:00:00	25.805
																												2014-11-10 05:00:00	25.708
																												2014-11-10 06:00:00	25.319
																												2014-11-10 07:00:00	25.319
																												2014-11-10 08:00:00	25.319
																												2014-11-10 09:00:00	25.708
																												2014-11-10 10:00:00	25.805
																												2014-11-10 11:00:00	26
																												2014-11-10 12:00:00	26.292
																												2014-11-10 13:00:00	26.195
																												2014-11-10 14:00:00	26.195
																												2014-11-10 15:00:00	26.39
																												2014-11-10 16:00:00	26.39
																												2014-11-10 17:00:00	26.292
																												2014-11-10 18:00:00	26.195
																												2014-11-10 19:00:00	26.097
																												2014-11-10 20:00:00	25.805
																												2014-11-10 21:00:00	25.61
																												2014-11-10 22:00:00	25.61
																												2014-11-10 23:00:00	25.513
																												2014-11-11	25.319
																												2014-11-11 01:00:00	25.222
																												2014-11-11 02:00:00	25.125
																												2014-11-11 03:00:00	25.708
																												2014-11-11 04:00:00	25.708
																												2014-11-11 05:00:00	25.61
																												2014-11-11 06:00:00	25.319
																												2014-11-11 07:00:00	25.125
																												2014-11-11 08:00:00	25.028
																												2014-11-11 09:00:00	25.319
																												2014-11-11 10:00:00	25.708
																												2014-11-11 11:00:00	26.097
																												2014-11-11 12:00:00	26.39
																												2014-11-11 13:00:00	26.683
																												2014-11-11 14:00:00	26.585
																												2014-11-11 15:00:00	26.488
																												2014-11-11 16:00:00	26.39
																												2014-11-11 17:00:00	26.097
																												2014-11-11 18:00:00	25.902
[truncated: 2,423 more rows]

## Sheet: Impacted
Reefs impacted by freshwater kill													T -test of impacted vs non-impacted bleaching + fading
Site/reef	GPS_point	Lat	Long	TTC	Pale	Bleached	Dead	Normal	bleaching and paling		OCTOBER
PR 44	136	21.4775	-157.831	80	5	30	0	65	35
PR 46	137	21.4798	-157.833	40	5	50	40	5	55
PR 46	138	21.4794	-157.834	60	30	10	50	10	40
PR 46	139	21.4791	-157.834	30	0	50	50	0	50
PR 37	140	21.4787	-157.835	30	50	30	80	0	80
PR 48	141	21.4809	-157.834	10	100	0	90	0	100
PR 47	142	21.4817	-157.831	80	5	5	0	90	10
PR 47	143	21.4811	-157.832	20	5	80	0	15	85
PR 47	144	21.4812	-157.833	80	5	20	0	75	25
PR 49	145	21.4828	-157.832	80	5	10	0	85	15
FR	147	21.4829	-157.837	80	5	40	0	55	45
FR	148	21.4821	-157.837	80	10	80	0	10	90
FR	149	21.4817	-157.836	80	0	50	0	50	50
FR	150	21.4812	-157.835	40	30	70	40	0	100
FR	151	21.4792	-157.836	50	50	50	50	0	100
FR	152	21.4777	-157.836	20	50	50	80	0	100
FR	153	21.4759	-157.839	20	50	50	80	0	100
FR	154	21.4762	-157.838	20	0	100	40	0	100
FR	155	21.4759	-157.836	80	5	20	0	75	25
FR	156	21.4757	-157.834	50	20	80	0	0	100
34/36	157	21.4744	-157.833	60	10	90	0	0	100
FR	158	21.4711	-157.834	30	50	50	0	0	100
FR	159	21.4702	-157.832	40	50	50	0	0	100
Site/reef	GPS_point	Lat	Long	Normal	Pale	Bleached	Dead	TCC	December
PR 33	287	21.472	-157.829	99	1	0	0	10
PR 33	288	21.4714	-157.83	100	0	0	0	10
PR 38	289	21.473	-157.829	100	0	0	0	50
PR 38	290	21.473	-157.829	97	3	0	0	50
PR T	298	21.4754	-157.83	99	1	0	0	80
PR 44	299	21.478	-157.831	98	1	1	0	80
PR 44	300	21.4778	-157.832	93	1	5	1	80
PR 46	301	21.4796	-157.833	95	1	3	1	40
PR 46	302	21.479	-157.834	88	1	1	10	60
PR 37	303	21.4788	-157.835	14	5	1	80	30
PR 48	304	21.4811	-157.834	15	3	2	80	10
PR 47	305	21.4821	-157.832	90	10	0	0	80
PR 47	306	21.4818	-157.833	100	0	0	0	80
PR 49	307	21.4832	-157.832	100	0	0	0	80
FR	308	21.4809	-157.835	10	0	0	90	80
FR	309	21.4804	-157.835	40	5	5	50	80
FR	310	21.4803	-157.835	6	2	2	90	80
FR	311	21.4783	-157.836	6	2	2	90	40
FR	312	21.4782	-157.836	20	0	0	80	50
FR	313	21.4758	-157.834	10	5	5	80	20
FR	314	21.4753	-157.834	10	10	1	79	20
FR	315	21.4705	-157.832	10	5	5	80	20
FR	316	21.47	-157.832	10	5	5	80	80
FR	317	21.4666	-157.828	10	5	5	80	50
FR	318	21.4662	-157.828	75	10	5	10	80

## Sheet: Non Impacted
Reefs not impacted by the FW kill
Site/reef	GPS_point	Lat	Long	TTC	Pale	Bleached	Dead	Normal	bleaching and paling			OCTOBER
HIMB Channel		21.4329	157.787	80	80	20	0	0	100
Point reef	104	21.434	-157.786	80	80	20	0	0	100
Point reef	105	21.4349	-157.786	80	80	20	0	0	100
Red Nun		21.4366	-157.787	80	20	60	0	20	80
Barrier reef		21.4426	-157.786	90	20	80	0	0	100
Barrier reef	106	21.4446	-157.784	80	10	40	0	50	50
Barrier reef	107	21.4457	-157.784	80	10	40	0	50	50
Barrier reef	108	21.448	-157.783	80	5	30	0	65	35
Crashboat	110	21.4494	-157.782	80	0	20	0	80	20
Crashboat	111	21.4513	-157.783	80	5	30	0	65	35
Crashboat	112	21.4535	-157.784	80	5	30	0	65	35
Kekepa	113	21.4603	-157.779	5	100	0	0	0	100
Kapapa	114	21.4685	-157.793	5	100	0	0	0	100
Kapapa	115	21.4688	-157.794	5	100	0	0	0	100
Kapapa	116	21.4752	-157.8	5	100	0	0	0	100
Kapapa	117	21.476	-157.799	5	90	10	0	0	100
Kapapa	118	21.4752	-157.8	5	80	10	0	10	90
Kapapa	119	21.4746	-157.801	5	60	30	0	10	90
Kapapa	120	21.4758	-157.802	10	60	40	0	0	100
Kapapa	121	21.4739	-157.805	5	5	40	0	55	45
Ahu O Laka	122	21.4746	-157.806	5	5	80	0	15	85
Ahu O Laka	123	21.4756	-157.807	5	5	80	0	15	85
Ahu O Laka	124	21.4761	-157.815	5	20	60	0	20	80
Ahu O Laka	125	21.4758	-157.82	20	5	50	0	45	55
Ahu O Laka	126	21.4756	-157.822	90	5	10	0	85	15
PR 41	127	21.4754	-157.823	80	5	50	0	45	55
PR 41	128	21.4747	-157.824	80	10	90	0	0	100
PR 40	129	21.4737	-157.823	80	0	80	0	20	80
PR 39	130	21.4747	-157.827	80	5	80	0	15	85
PR38	131	21.4732	-157.829	50	5	80	0	15	85
PR 33	132	21.472	-157.83	10	5	90	0	5	95
PR 42	133	21.4769	-157.825	80	5	50	0	45	55
PR 42	134	21.4772	-157.826	80	0	20	0	80	20
PR 43	135	21.4772	-157.826	80	0	50	0	50	50
PR 33	160	21.4712	-157.829	20	50	50	0	0	100
PR 33 edge	161	21.4712	-157.83	80	50	50	0	0	100
PR 32	162	21.4721	-157.826	80	10	30	0	60	40
PR 31	163	21.4715	-157.826	20	0	90	0	10	90
PR 31 edge	164	21.4708	-157.826	80	20	40	0	40	60
FR	165	21.4686	-157.829	80	10	90	0	0	100
FR	166	21.4665	-157.828	80	30	70	0	0	100
FR	167	21.4638	-157.829	80	50	50	0	0	100
FR	168	21.4615	-157.827	80	60	40	0	0	100
FR	169	21.4568	-157.825	80	70	30	0	0	100
FR	170	21.4553	-157.824	80	70	30	0	0	100
FR	171	21.4553	-157.821	80	20	80	0	0	100
FR	172	21.4558	-157.818	80	10	30	0	60	40
FR	173	21.4565	-157.815	80	10	30	0	60	40
FR	174	21.4537	-157.814	80	10	40	0	50	50
FR	175	21.4509	-157.813	80	30	40	0	30	70
FR	176	21.4515	-157.811	80	20	40	0	40	60
PR 18 E	177	21.4512	-157.811	80	5	40	0	55	45
PR 18 F	178	21.45	-157.813	20	20	80	0	0	100
FR	179	21.4486	-157.81	80	50	50	0	0	100
PR 17F	180	21.448	-157.81	5	10	50	0	40	60
PR 17E	181	21.445	-157.809	80	5	50	0	45	55
FR	182	21.4464	-157.807	80	10	50	0	40	60
PR 10E	183	21.4469	-157.804	80	5	50	0	45	55
PR 10F	184	21.447	-157.804	20	5	40	0	55	45
PR 10E	185	21.446	-157.804	80	10	80	0	10	90
PR 9E	186	21.4472	-157.801	80	10	50	0	40	60
PR9F	187	21.4462	-157.801	80	5	50	0	45	55
PR 9E	188	21.4457	-157.802	80	0	10	0	90	10
FR	189	21.4425	-157.806	80	25	50	0	25	75
PR 6	190	21.4402	-157.805	80	25	50	0	25	75
PR 6	191	21.4401	-157.805	40	10	30	0	60	40
PR 6	192	21.4401	-157.805	80	50	50	0	0	100
FR	193	21.4386	-157.803	80	30	40	0	30	70
PB 5	194	21.4393	-157.8	80	20	60	0	20	80
FR	195	21.436	-157.802	80	10	80	0	10	90
PR 5 F	196	21.4365	-157.799	30	20	30	0	50	50
PR 5 E	197	21.4367	-157.799	75	10	40	0	50	50
PR 4 F	198	21.4358	-157.798	20	5	50	0	45	55
PR 4 E	199	21.4358	-157.798	80	0	80	0	20	80
FR	200	21.4318	-157.803	80	10	50	0	40	60
FR	201	21.4307	-157.801	80	10	50	0	40	60
FR	202	21.4294	-157.798	80	10	50	0	40	60
FR	203	21.4299	-157.795	75	20	40	0	40	60
Lilipuna FR	204	21.4299	-157.793	80	50	50	0	0	100
HIMB Lagoon	205	21.4325	-157.79	30	50	50	0	0	100
HIMB	206	21.4305	-157.79	80	20	40	0	40	60
HIMB	207	21.4301	-157.788	80	20	40	0	40	60
HIMB	208	21.4318	-157.787	80	10	70	0	20	80
FR	209	21.4283	-157.79	80	20	80	0	0	100
FR	210	21.4149	-157.78	5	95	0	0	5	95
FR	211	21.4155	-157.777	5	50	30	0	20	80
FR	212	21.4171	-157.773	80	40	40	0	20	80
FR	213	21.4193	-157.773	80	5	25	0	70	30
FR	214	21.4227	-157.771	80	0	50	0	50	50
FR	215	21.4263	-157.77	80	5	40	0	55	45
FR	216	21.4289	-157.768	75	0	20	0	80	20
PR 8	217	21.4439	-157.792	80	10	20	0	70	30
PR 11	218	21.4489	-157.795	80	5	10	0	85	15
PR 12	219	21.4505	-157.797	80	1	40	0	59	41
PR 14	220	21.4524	-157.801	80	5	40	0	55	45
PR 15	221	21.4536	-157.803	80	10	50	0	40	60
PR 16	222	21.4545	-157.804	80	10	40	0	50	50
PR 19	223	21.4577	-157.807	80	1	30	0	69	31
PR 20	224	21.4607	-157.81	70	5	30	0	65	35
PR 22	225	21.4607	-157.813	80	5	30	0	65	35
PR 23	226	21.4616	-157.814	80	10	30	0	60	40
PR 21	227	21.4631	-157.812	80	10	40	0	50	50
PR 24	228	21.4618	-157.816	80	10	40	0	50	50
PR 25	229	21.461	-157.822	80	5	80	0	15	85
PR 25F	230	21.4609	-157.822	5	45	45	0	10	90
PR 26	231	21.4658	-157.819	80	10	70	0	20	80
PR 26 F	232	21.4657	-157.819	5	20	70	0	10	90
PR 26E	233	21.4658	-157.82	80	5	30	0	65	35
PR 27F	234	21.4674	-157.822	10	20	50	0	30	70
PR 27E	235	21.4673	-157.822	80	10	50	0	40	60
PR 29 E	236	21.471	-157.82	80	30	70	0	0	100
PR 29 F	237	21.4707	-157.82	5	40	50	0	10	90
PR 28 E	238	21.4694	-157.82	80	30	70	0	0	100
PR 28 F	239	21.469	-157.82	5	10	50	0	40	60
PR 30 E	240	21.4712	-157.823	80	10	90	0	0	100
PR 30 F	241	21.4712	-157.823	5	25	50	0	25	75
BR	242	21.472	-157.819	80	50	50	0	0	100
PR 8	243	21.462	-157.81	80	5	50	0	45	55
PR 3	244	21.4377	-157.792	80	0	25	0	75	25
PR 2E	245	21.4334	-157.794	80	5	25	0	70	30
PR 2F	246	21.4333	-157.795	15	0	25	0	75	25
Site/reef	GPS_point	Lat	Long	Normal	Pale	Bleached	Dead	TCC		December
HIIMB Channel	248	21.4329	-157.787	95	5	0	1	80
Point Reef	250	21.4333	-157.786	100	0	0	0	80
Point Reef	251	21.4335	-157.786	100	1	0	0	80
Red Nun	252	21.4366	-157.787	95	0	0	5	80
MCBH	253	21.4426	-157.786	98	1	1	0	80
MCBH	254	21.4444	-157.784	99	1	0	0	80
Red Triangle	255	21.4495	-157.782	99	1	0	0	80
Crash Boat	256	21.4507	-157.782	100	0	0	0	80
Crash Boat	257	21.4526	-157.784	99	1	0	0	80
PR 8	258	21.4459	-157.794	97	1	1	1	80
PR 8	259	21.4448	-157.797	98	0	1	1	80
PR 11	260	21.449	-157.795	90	0	5	5	80
PR 13	261	21.4507	-157.795	85	5	5	5	80
PR 12	262	21.451	-157.797	93	1	1	5	80
PR 14	263	21.4534	-157.801	98	1	1	0	80
PR 14	264	21.4531	-157.802	98	1	1	0	80
PR 15	265	21.4538	-157.803	99	0	1	0	80
PR 15	266	21.4537	-157.803	93	1	1	5	80
PR 15	267	21.4536	-157.804	97	1	1	0	80
PR 16	268	21.4549	-157.804	98	0	1	1	80
PR 19	269	21.4578	-157.807	100	0	0	0	80
PR 20	270	21.4608	-157.81	100	0	0	0	80
PR 22	271	21.4608	-157.814	99	1	0	0	80
PR 23	272	21.4616	-157.814	99	1	0	0	80
PR 24	273	21.4623	-157.816	100	0	0	0	80
PR 21	274	21.4631	-157.812	99	1	0	0	80
PR 26	275	21.4661	-157.818	98	1	1	0	80
PR 27	276	21.4677	-157.822	99	1	0	0	80
PR 27	277	21.4673	-157.823	99	0	1	0	80
PR 28	278	21.4688	-157.82	100	0	0	0	80
PR 28	279	21.4684	-157.82	100	0	0	0	80
PR 29	280	21.4702	-157.819	99	1	0	0	80
PR 30	282	21.4716	-157.824	99	0	1	0	80
PR 30	283	21.4711	-157.824	99	0	1	0	80
PR 31	284	21.4709	-157.825	99	1	0	0	80
PR 31	285	21.4706	-157.826	99	1	0	0	80
PR 32	286	21.4718	-157.826	100	0	0	0	80
PR 38	291	21.4741	-157.827	99	1	0	0	50
PR 39	292	21.4733	-157.823	99	1	0	0	80
PR 40	293	21.475	-157.823	98	1	1	0	80
PR 41	294	21.476	-157.822	97	2	1	0	80
BR	295	21.4779	-157.824	100	0	0	0	80
PR 42	296	21.4779	-157.825	99	1	0	0	80
PR 43	297	21.4772	-157.826	99	2	0	0	80
FR	319	21.4567	-157.825	25	25	25	25	80
FR	320	21.4561	-157.825	25	25	25	25	80
PR 25	321	21.4604	-157.822	90	5	5	0	80
PR 25	322	21.4601	-157.823	90	5	5	0	80
FR	323	21.4561	-157.815	90	5	5	0	50
FR	324	21.4561	-157.815	90	5	5	0	50
PR 18	325	21.4518	-157.811	90	5	5	0	80
PR 18	326	21.4514	-157.812	100	0	0	0	20
PR 17	327	21.4485	-157.809	95	5	0	0	40
PR 17	328	21.4483	-157.81	99	1	0	0	80
FR	329	21.4479	-157.81	95	5	0	0	80
FR Heeia	330	21.4464	-157.808	95	5	0	0	80
PR 10	331	21.4472	-157.804	100	0	0	0	80
PR 9	332	21.4473	-157.801	100	0	0	0	80
PR 7	333	21.4441	-157.8	95	5	0	0	80
PR 6	334	21.4404	-157.805	95	5	0	0	80
FR	335	21.4394	-157.804	90	10	0	0	80
PR 5	336	21.4384	-157.801	99	1	0	0	80
PR 5	337	21.4379	-157.797	100	0	0	0	80
PR 4	338	21.4358	-157.798	95	5	0	0	80
PR 3	340	21.4375	-157.794	98	1	1	0	80
PR 2	341	21.4335	-157.794	100	0	0	0	80
Lilipuna FR	342	21.43	-157.792	95	5	0	0	80
Lilipuna FR	343	21.4298	-157.791	98	2	0	0	80
HIMB Lagoon	344	21.4324	-157.79	95	5	0	0	80
HIMB FR	345	21.4307	-157.79	95	5	0	0	80
HIMB FR	346	21.4299	-157.788	100	0	0	0	80
FR South	347	21.4149	-157.78	60	20	20	0	20
FR South	348	21.4156	-157.777	85	10	5	0	20
FR South	349	21.4203	-157.772	65	30	5	0	20
FR South	350	21.4232	-157.771	80	15	5	0	20
FR South	351	21.4264	-157.77	95	5	0	0	20
FR South	352	21.4297	-157.768	100	0	0	0	20
Kepapa	353	21.461	-157.78	50	45	5	0	10
BR	354	21.4675	-157.794	100	0	0	0	5
BR	355	21.4675	-157.795	100	0	0	0	5
Kapapa	356	21.4734	-157.8	45	30	25	0	5
Kapapa	357	21.4734	-157.8	40	30	30	0	5
Kapapa	358	21.4738	-157.8	40	30	25	5	10
Kapapa	359	21.4733	-157.804	90	10	0	0	10
BR	360	21.4741	-157.807	60	30	5	5	10
BR	361	21.474	-157.807	55	30	10	5	10
SandBar	362	21.4737	-157.82	100	0	0	0	10
SandBar	363	21.4736	-157.82	100	0	0	0	80
SandBar	364	21.4749	-157.82	100	0	0	0	50
SandBar	365	21.4756	-157.822	97	1	1	1	50
SandBar	366	21.4757	-157.822	98	1	1	0	50
FR	367	21.4339	-157.803	40	50	10	0	80
FR	368	21.4311	-157.802	40	50	10	0	80
FR	369	21.4293	-157.799	45	50	5	0	80
FR	370	21.4299	-157.796	60	40	0	0	80

## Sheet: Summary
SUMMARY	FINAL							avg TCC and bleached		% died										2014 T-6 %	coral	bleached	recently dead	2014 all TCC	sd	mean		2015 T-6 %	coral	bleached	recently dead	2015 all TCC	sd	mean
	2014-08-01			2015-02-01				26.7451		7.86087										1	27.2	24.8		52	11.6243	41.4933		1	33	0	0	33	10.4448	44.2333
T-1	% cover			T-1	% cover															2	21.3333	19.3333		40.6667				2	39	0	0	39
CA	45.8261			CA	44.4571		transect	TCC incl beached		recent dead						%change				3	39.2	8		47.2				3	42.5	0	0	42.5
Malg	5.65217			Malg	2.51429			2014	2015				%change	25.441	2.28571	228.571				4	30.4	15.2		45.6				4	60.8889	0	0	60.8889
bleached Pd	0.608696			Pc	36.5714		1	31.2174	36.5714	1.30435	5.35404	0.171508	17.1508	12.5727	1.17502	117.502		mean 2014	mean 2015	5	18	4		22				5	45.7778	0	0	45.7778
Pc	11.1304			substrate	0.685714		2	38.8	23.2727	4	-15.5273	-0.400187	-40.0187	8.50728	78.6923	7869.23		26.7451	17.5738
bleached Porites	19.4783			tunicate	1.02857		3	24.4324	8.61538	12	-15.817	-0.647379	-64.7379	8.10526	#DIV/0!	#DIV/0!				2014 T-7 %								2015 T-7 %
substrate	10.7826			Turf	14.7429		4	12.2759	8.10526	6	-4.1706	-0.33974	-33.974	6.92935	1.58385	158.385				1	10	2		12	20.548	36		1	44	0	0	44	8.97109	48.8533
Turf	5.21739			TCC	36.5714		5	27	11.3043	16	-15.6957	-0.58132	-58.132	17.9048	0.671429	67.1429				2	24	16		40			SD	2	48	0	0	48			sd
recently dead	1.30435						6	40.7407	44.5714	0	3.83069	0.094026	9.4026	21.2826	0.773913	77.3913				3	54.6667	13.3333		68			6.31007	3	42.2222	0	0	42.2222			1.04205
							7	34.75	48.7826	0	14.0326	0.403816	40.3816							4	28	1.33333		29.3333			2014	4	45.6	0	0	45.6			2015
T-2				T-2																5	28	2.66667		30.6667			grand mean	5	64.4444	0	0	64.4444			grand mean
CA	39.9			CA	40.2727			Coral		recovery	bleached coral	how much recovered																						38.7467								46.5433
Malg	2.1			Malg	4.81818			2014	2015		2014					% recovery
bleached Montipora	1.5			Pc	23.2727		1	11.1304	36.5714	25.441	20.087	16.4845		25.441	2.28571	228.571
bleached Pd	0.7			other	0.363636		2	10.7	23.2727	12.5727	28.1	-4.82727		12.5727	1.17502	117.502
Pc	10.7			silt	0.454545		3	0.108108	8.61538	8.50728	12.1081	-3.49272		8.50728	78.6923	7869.23
bleached Porites	25.9			Turf	27.7273		4	0	8.10526	8.10526	12.2759	-4.1706		8.10526	#DIV/0!	#DIV/0!
substrate	10.4			substrate	3.09091		5	4.375	11.3043	6.92935	22.625	-11.3207		6.92935	1.58385	158.385
Turf	4.9			TCC	23.2727		6	26.6667	44.5714	17.9048	14.0741	30.4974		17.9048	0.671429	67.1429
recently dead	3.9						7	27.5	48.7826	21.2826	7.25	41.5326		21.2826	0.773913	77.3913
								26.7451	17.5738
				T-3					17.5738					no difference in TCC except for T3 so bleached corals recovered
T-3				CA	32.5128				46.677		24.8921			recently dead coral mean 2014 6.8 range 0-32 SE 1.61 SD 8.06
CA	46.0541			Malg	4.92308
Malg	3.24324			Pc	8.61538
silt	0.432432			sand	0.205128
sand	0.324324			silt	10.0513
Pc	0.108108			Turf	41.1282								2014 T-1 %	coral	bleached	recently dead	2014 all TCC	sd	mean		2015 T-1 %	coral	bleached	recently dead	2015 all TCC	sd	mean
bleached Porites	12.1081			substrate	2.5641		2014	All coral incl bleached					1	19.1111	12.8889	0.888889	32	8.57603	30.7822		1	0	0	0	0	44.2055	36.5714
substrate	9.72973			TCC	8.61538			T-1	T-2	T-3	T-4	T-5	2	8.4	8.4	0	16.8				2	0	0	0	0
Turf	15.7838						1	32	66.67	9	23.33	26.4	3	24.8	11.2	2	36				3	64.5714	0	0	64.5714
recently dead	12.2162						2	16.8	27.2	16.8	6.4	6.67	4	20	10	0.5	30				4	100	0	0	100
				T-4			3	36	30.8	8	12	12	5	25.7778	13.3333	3.11111	39.1111				5	18.2857	0	0	18.2857
T-4				CA	28		4	30	29.6	12	12.67	12.67
CA	69.6552			Malg	3.68421		5	39.11	36	24	6	6	2014 T-2 %								2015 T-2 %
Malg	0.413793			other	1.26316		2015	T-1	T-2	T-3	T-4	T-5	1	41.3333	25.3333	1.33333	66.6667	16.3157	38.0533		1	0	0	0	0	34.483	22.7556
silt	0.689655			silt	1.36842		1	0	0	0	10.2857	20.8889	2	21.2	6	0.4	27.2			SD	2	0	0	0	0			sd
bleached Porites	12.2759			sand	0.421053		2	0	0	10.2857	5.71429	10.4	3	25.6	5.2	8	30.8			4.36296	3	77.7778	0	0	77.7778			18.8993
substrate	1.65517			substrate	1.78947		3	64.5714	77.7778	10	6.5	8.4	4	21.2	8.4	1.6	29.6			2014	4	36	0	0	36			2015
Turf	9.51724			Turf	55.3684		4	100	36	11	1	7.6	5	32	4	32	36			grand mean	5	0	0	0	0			grand mean
recently dead	5.7931			Pc	7.89474		5	18.2857	0	12	17	13.6								23.9964								17.6524
				Mp	0.210526								2014 T-3 %								2015 T-3 %
													1	9	9	13	18	15.2746	26.32		1	0	0	0	0	4.90065	8.65714
				T-5			Descriptive Statistics: 2014 all TCC, 2015 all TCC						2	16.8	16.8	10.4	33.6				2	10.2857	0	0	10.2857
T-5				CA	23.3043								3	0.4	7.6	12.4	8				3	10	0	0	10
CA	24.75			Malg	2.95652		Variable N N* Mean SE Mean StDev Minimum Q1 Median Q3						4	12	12	13.1429	24				4	11	0	0	11
Malg	3.125			silt	17.1304		2014 all TCC 25 0 24.00 2.98 14.92 6.00 12.00 24.00 32.80						5	24	24	12	48				5	12	0	0	12
silt	7			sand	0.695652		2015 all TCC 25 0 17.65 5.14 25.71 0.000000000 0.500 10.29 17.65
Mc	0.375			other	3.47826								2014 T-4 %								2015 T-4 %
Pc	4			substrate	5.30435		Variable Maximum						1	0	23.3333	18	23.3333	7.00387	12.08		1	10.2857	0	0	10.2857	5.97179	8.1
bleached Porites	22.625			Turf	35.8261		2014 all TCC 66.67						2	0	6.4	0	6.4				2	5.71429	0	0	5.71429
substrate	9.5			Pc	11.2174		2015 all TCC 100.00						3	0	12	2	12				3	6.5	0	0	6.5
Turf	13			Fs	0.0869565								4	0	12.6667	4.66667	12.6667				4	1	0	0	1
recently dead	15.625						Variable N N* Mean SE Mean StDev Minimum Q1 Median Q3						5	0	6	3.33333	6				5	17	0	0	17
				T-6			R dead 25 0 6.81 1.61 8.06 0.000000000 1.11 3.33 12.20
				CA	17.8095								2014 T-5 %								2015 T-5 %
T-6				Malg	2.66667		Variable Maximum						1	0	26.4	21.6	26.4	8.20764	12.7467		1	20.8889	0	0	20.8889	5.39199	12.1778
CA	27.7037			Pc	26.6667		R dead 32.00						2	0	6.66667	0	6.66667				2	10.4	0	0	10.4
Malg	1.03704			sand	7.42857								3	0	12	2	12				3	8.4	0	0	8.4
Mc	4.74074			silt	4.95238								4	0	12.6667	4.66667	12.6667				4	7.6	0	0	7.6
Pc	21.9259			substrate	6.28571								5	0	6	3.33333	6				5	13.6	0	0	13.6
bleached Pc	9.62963			Turf	16.2857
bleached Mc	4.44444			Mc	17.1429
Porifera	0.444444			Fs	0.285714
sand	9.18519			Lp	0.0952381
silt	0.444444			Pd	0.380952
substrate	14.5185			total points	1050
Turf	5.92593			TCC	44.5714
total points	675
				T-7
				CA	19.2174
T-7				Malg	13.6522
CA	27.25			Pc	30.2609
Malg	1.75			sand	2.43478
Mc	17.25			silt	0.608696
bleached Pc	1			substrate	6.43478
bleached Mc	6.25			Turf	8.86957
Porifera	0.25			Mc	18.4348
sand	16.5			Fs	0.0869565
substrate	9.25			total points	1150
Turf	10.25
Pc	9.75
Lp	0.5
total points	400

## Sheet: Point data
2014										)	1	2014 PR46 T1_10			bleached Pc	1	2014 PR46 T1_11			bleached Pc	1	2014 PR46 T1_21			bleached Pc	1	2014 PR46 T1_31			bleached Pc	1	2014 PR46 T1_42							bleached Mc	1	2014PR46T2_6			bleached Mc	1	2014PR46T2_11			bleached Pc
			T-1	bleached coral	Pc	recently dead	points			bleached Pc	1	2014 PR46 T1_10			bleached Pc	1	2014 PR46 T1_11			bleached Pc	1	2014 PR46 T1_21			bleached Pc	1	2014 PR46 T1_32			bleached Pc	1	2014 PR46 T1_42		T-2	bleached coral	Pc	recently dead	points	bleached Mc	1	2014PR46T2_6			bleached Mc	1	2014PR46T2_15			bleached Pc
			1	43	29	2	225			bleached Pc	1	2014 PR46 T1_10			bleached Pc	1	2014 PR46 T1_11			bleached Pc	1	2014 PR46 T1_23			bleached Pc	1	2014 PR46 T1_32			bleached Pc	1	2014 PR46 T1_42		1	93	57	3	225	bleached Pc	1	2014PR46T2_10			bleached Mc	1	2014PR46T2_15			bleached Pc
			2	21	21	0	250			bleached Pc	1	2014 PR46 T1_10			bleached Pc	1	2014 PR46 T1_11			bleached Pc	1	2014 PR46 T1_24			bleached Pc	1	2014 PR46 T1_32			bleached Pc	1	2014 PR46 T1_42		2	53	15	1	250	bleached Pc	1	2014PR46T2_10			bleached Pc	1	2014PR46T2_11			bleached Pc
			3	62	28	5	250			bleached Pc	1	2014 PR46 T1_2			bleached Pc	1	2014 PR46 T1_11			bleached Pc	1	2014 PR46 T1_24			bleached Pc	1	2014 PR46 T1_32			bleached Pc	1	2014 PR46 T1_42		3	64	13	20	250	bleached Pc	1	2014PR46T2_10			bleached Pc	1	2014PR46T2_11			bleached Pc
			4	40	20	1	200			bleached Pc	1	2014 PR46 T1_2			bleached Pc	1	2014 PR46 T1_11			bleached Pc	1	2014 PR46 T1_24			bleached Pc	1	2014 PR46 T1_32			bleached Pc	1	2014 PR46 T1_42		4	53	21	4	250	bleached Pc	1	2014PR46T2_10			bleached Pc	1	2014PR46T2_11			bleached Pc
			5	58	30	7	225			bleached Pc	1	2014 PR46 T1_2			bleached Pc	1	2014 PR46 T1_14			bleached Pc	1	2014 PR46 T1_24			bleached Pc	1	2014 PR46 T1_32			bleached Pc	1	2014 PR46 T1_42		5	8	1	8	25	bleached Pc	1	2014PR46T2_10			bleached Pc	1	2014PR46T2_12			bleached Pc
			T-1 %							bleached Pc	1	2014 PR46 T1_2			bleached Pc	1	2014 PR46 T1_15			bleached Pc	1	2014 PR46 T1_26			bleached Pc	1	2014 PR46 T1_32			bleached Pc	1	2014 PR46 T1_42		T-2 %					bleached Pc	1	2014PR46T2_10			bleached Pc	1	2014PR46T2_12			bleached Pc
			1	19.1111	12.8889	0.888889				bleached Pc	1	2014 PR46 T1_2			bleached Pc	1	2014 PR46 T1_15			bleached Pc	1	2014 PR46 T1_26			bleached Pc	1	2014 PR46 T1_32			bleached Pc	1	2014 PR46 T1_42		1	41.3333	25.3333	1.33333		bleached Pc	1	2014PR46T2_10			bleached Pc	1	2014PR46T2_12			bleached Pc
			2	8.4	8.4	0				bleached Pc	1	2014 PR46 T1_2			bleached Pc	1	2014 PR46 T1_16			bleached Pc	1	2014 PR46 T1_26			bleached Pc	1	2014 PR46 T1_32			bleached Pc	1	2014 PR46 T1_42		2	21.2	6	0.4		bleached Pc	1	2014PR46T2_10			bleached Pc	1	2014PR46T2_12			bleached Pc
			3	24.8	11.2	2				bleached Pc	1	2014 PR46 T1_2			bleached Pc	1	2014 PR46 T1_16			bleached Pc	1	2014 PR46 T1_26			bleached Pc	1	2014 PR46 T1_32			bleached Pc	1	2014 PR46 T1_42		3	25.6	5.2	8		bleached Pc	1	2014PR46T2_2			bleached Pc	1	2014PR46T2_12			bleached Pc
			4	20	10	0.5				bleached Pc	1	2014 PR46 T1_2			bleached Pc	1	2014 PR46 T1_17			bleached Pc	1	2014 PR46 T1_27			bleached Pc	1	2014 PR46 T1_33			bleached Pc	1	2014 PR46 T1_42		4	21.2	8.4	1.6		bleached Pc	1	2014PR46T2_2			bleached Pc	1	2014PR46T2_13			bleached Pc
			5	25.7778	13.3333	3.11111				bleached Pc	1	2014 PR46 T1_2			bleached Pc	1	2014 PR46 T1_17			bleached Pc	1	2014 PR46 T1_27			bleached Pc	1	2014 PR46 T1_33			bleached Pc	1	2014 PR46 T1_43		5	32	4	32		bleached Pc	1	2014PR46T2_2			bleached Pc	1	2014PR46T2_13			bleached Pc
										bleached Pc	1	2014 PR46 T1_3			bleached Pc	1	2014 PR46 T1_17			bleached Pc	1	2014 PR46 T1_27			bleached Pc	1	2014 PR46 T1_34			bleached Pc	1	2014 PR46 T1_44							bleached Pc	1	2014PR46T2_2			bleached Pc	1	2014PR46T2_13			bleached Pc
				224	128	15				bleached Pc	1	2014 PR46 T1_3			bleached Pc	1	2014 PR46 T1_17			bleached Pc	1	2014 PR46 T1_27			bleached Pc	1	2014 PR46 T1_36			bleached Pc	1	2014 PR46 T1_44							bleached Pc	1	2014PR46T2_2			bleached Pc	1	2014PR46T2_16			bleached Pc
										bleached Pc	1	2014 PR46 T1_3			bleached Pc	1	2014 PR46 T1_17			bleached Pc	1	2014 PR46 T1_27			bleached Pc	1	2014 PR46 T1_36			bleached Pc	1	2014 PR46 T1_44							bleached Pc	1	2014PR46T2_2			bleached Pc	1	2014PR46T2_16			bleached Pc
										bleached Pc	1	2014 PR46 T1_3			bleached Pc	1	2014 PR46 T1_17			bleached Pc	1	2014 PR46 T1_27			bleached Pc	1	2014 PR46 T1_36			bleached Pc	1	2014 PR46 T1_44							bleached Pc	1	2014PR46T2_2			bleached Pc	1	2014PR46T2_16			bleached Pc
										bleached Pc	1	2014 PR46 T1_3			bleached Pc	1	2014 PR46 T1_17			bleached Pc	1	2014 PR46 T1_27			bleached Pc	1	2014 PR46 T1_36			bleached Pc	1	2014 PR46 T1_44							bleached Pc	1	2014PR46T2_2			bleached Pc	1	2014PR46T2_16			bleached Pc
										bleached Pc	1	2014 PR46 T1_3			bleached Pc	1	2014 PR46 T1_17			bleached Pc	1	2014 PR46 T1_27			bleached Pc	1	2014 PR46 T1_36			bleached Pc	1	2014 PR46 T1_45							bleached Pc	1	2014PR46T2_2			bleached Pc	1	2014PR46T2_16			bleached Pc
										bleached Pc	1	2014 PR46 T1_3			bleached Pc	1	2014 PR46 T1_17			bleached Pc	1	2014 PR46 T1_28			bleached Pc	1	2014 PR46 T1_39			bleached Pc	1	2014 PR46 T1_45							bleached Pc	1	2014PR46T2_2			bleached Pc	1	2014PR46T2_16			bleached Pc
										bleached Pc	1	2014 PR46 T1_3			bleached Pc	1	2014 PR46 T1_17			bleached Pc	1	2014 PR46 T1_28			bleached Pc	1	2014 PR46 T1_39			bleached Pc	1	2014 PR46 T1_45							bleached Pc	1	2014PR46T2_2			bleached Pc	1	2014PR46T2_16			bleached Pc
										bleached Pc	1	2014 PR46 T1_4			Coralline algae	1	2014 PR46 T1_11			bleached Pc	1	2014 PR46 T1_28			bleached Pc	1	2014 PR46 T1_39			bleached Pc	1	2014 PR46 T1_45							bleached Pc	1	2014PR46T2_2			bleached Pc	1	2014PR46T2_16			bleached Pc
										bleached Pc	1	2014 PR46 T1_4			Coralline algae	1	2014 PR46 T1_11			bleached Pc	1	2014 PR46 T1_28			bleached Pc	1	2014 PR46 T1_39			bleached Pc	1	2014 PR46 T1_46							bleached Pc	1	2014PR46T2_3			bleached Pc	1	2014PR46T2_16			bleached Pc
										bleached Pc	1	2014 PR46 T1_6			Coralline algae	1	2014 PR46 T1_11			bleached Pc	1	2014 PR46 T1_28			bleached Pc	1	2014 PR46 T1_39			bleached Pc	1	2014 PR46 T1_46							bleached Pc	1	2014PR46T2_3			bleached Pc	1	2014PR46T2_17			bleached Pc
										bleached Pc	1	2014 PR46 T1_6			Coralline algae	1	2014 PR46 T1_11			bleached Pc	1	2014 PR46 T1_28			bleached Pc	1	2014 PR46 T1_39			bleached Pc	1	2014 PR46 T1_46							bleached Pc	1	2014PR46T2_3			bleached Pc	1	2014PR46T2_17			bleached Pc
										bleached Pc	1	2014 PR46 T1_6			Coralline algae	1	2014 PR46 T1_11			bleached Pc	1	2014 PR46 T1_28			bleached Pc	1	2014 PR46 T1_39			bleached Pc	1	2014 PR46 T1_46							bleached Pc	1	2014PR46T2_3			bleached Pc	1	2014PR46T2_19			bleached Pc
										bleached Pc	1	2014 PR46 T1_6			Coralline algae	1	2014 PR46 T1_12			bleached Pc	1	2014 PR46 T1_28			bleached Pc	1	2014 PR46 T1_39			bleached Pc	1	2014 PR46 T1_46							bleached Pc	1	2014PR46T2_3			bleached Pc	1	2014PR46T2_20			bleached Pc
										bleached Pc	1	2014 PR46 T1_6			Coralline algae	1	2014 PR46 T1_12			bleached Pc	1	2014 PR46 T1_28			bleached Pc	1	2014 PR46 T1_39			bleached Pc	1	2014 PR46 T1_46							bleached Pc	1	2014PR46T2_3			bleached Pc	1	2014PR46T2_20			bleached Pc
										bleached Pc	1	2014 PR46 T1_6			Coralline algae	1	2014 PR46 T1_12			bleached Pc	1	2014 PR46 T1_28			bleached Pc	1	2014 PR46 T1_39			bleached Pc	1	2014 PR46 T1_46							bleached Pc	1	2014PR46T2_3			bleached Pc	1	2014PR46T2_20			bleached Pc
										bleached Pc	1	2014 PR46 T1_6			Coralline algae	1	2014 PR46 T1_12			bleached Pc	1	2014 PR46 T1_28			bleached Pc	1	2014 PR46 T1_39			bleached Pc	1	2014 PR46 T1_46							bleached Pc	1	2014PR46T2_5			bleached Pc	1	2014PR46T2_20			bleached Pc
										bleached Pc	1	2014 PR46 T1_6			Coralline algae	1	2014 PR46 T1_12			bleached Pc	1	2014 PR46 T1_28			bleached Pc	1	2014 PR46 T1_39			bleached Pc	1	2014 PR46 T1_46							bleached Pc	1	2014PR46T2_6			bleached Pc	1	2014PR46T2_20			bleached Pc
										bleached Pc	1	2014 PR46 T1_6			Coralline algae	1	2014 PR46 T1_12			bleached Pc	1	2014 PR46 T1_28			bleached Pc	1	2014 PR46 T1_39			bleached Pc	1	2014 PR46 T1_46							bleached Pc	1	2014PR46T2_6			bleached Pc	1	2014PR46T2_20			bleached Pc
										bleached Pc	1	2014 PR46 T1_7			Coralline algae	1	2014 PR46 T1_12			bleached Pc	1	2014 PR46 T1_28			bleached Pc	1	2014 PR46 T1_39			bleached Pc	1	2014 PR46 T1_46							bleached Pc	1	2014PR46T2_6			bleached Pc	1	2014PR46T2_20			bleached Pc
										bleached Pc	1	2014 PR46 T1_7			Coralline algae	1	2014 PR46 T1_12			bleached Pc	1	2014 PR46 T1_28			bleached Pc	1	2014 PR46 T1_39			bleached Pc	1	2014 PR46 T1_46							bleached Pc	1	2014PR46T2_6			bleached Pc	1	2014PR46T2_20			bleached Pc
										bleached Pc	1	2014 PR46 T1_7			Coralline algae	1	2014 PR46 T1_12			bleached Pc	1	2014 PR46 T1_29			bleached Pc	1	2014 PR46 T1_39			bleached Pc	1	2014 PR46 T1_46							bleached Pc	1	2014PR46T2_6			bleached Pc	1	2014PR46T2_20			bleached Pc
										bleached Pc	1	2014 PR46 T1_7			Coralline algae	1	2014 PR46 T1_12			bleached Pc	1	2014 PR46 T1_29			bleached Pc	1	2014 PR46 T1_39			bleached Pc	1	2014 PR46 T1_46							bleached Pc	1	2014PR46T2_6			bleached Pc	1	2014PR46T2_20			bleached Pc
										bleached Pc	1	2014 PR46 T1_7			Coralline algae	1	2014 PR46 T1_12			bleached Pc	1	2014 PR46 T1_29			bleached Pc	1	2014 PR46 T1_39			bleached Pc	1	2014 PR46 T1_47							bleached Pc	1	2014PR46T2_6			bleached Pc	1	2014PR46T2_20			bleached Pc
										bleached Pc	1	2014 PR46 T1_5			Coralline algae	1	2014 PR46 T1_12			bleached Pc	1	2014 PR46 T1_29			bleached Pc	1	2014 PR46 T1_40			bleached Pc	1	2014 PR46 T1_47							bleached Pc	1	2014PR46T2_6			bleached Pc	1	2014PR46T2_20			bleached Pc
										bleached Pc	1	2014 PR46 T1_5			Coralline algae	1	2014 PR46 T1_12			bleached Pc	1	2014 PR46 T1_29			bleached Pc	1	2014 PR46 T1_40			bleached Pc	1	2014 PR46 T1_47							bleached Pc	1	2014PR46T2_6			bleached Pd	1	2014PR46T2_12			bleached Pc
										bleached Pc	1	2014 PR46 T1_5			Coralline algae	1	2014 PR46 T1_12			bleached Pc	1	2014 PR46 T1_29			bleached Pc	1	2014 PR46 T1_40			bleached Pc	1	2014 PR46 T1_47							bleached Pc	1	2014PR46T2_6			bleached Pd	1	2014PR46T2_17			bleached Pc
										bleached Pc	1	2014 PR46 T1_5			Coralline algae	1	2014 PR46 T1_12			bleached Pc	1	2014 PR46 T1_29			Coralline algae	1	2014 PR46 T1_31			bleached Pc	1	2014 PR46 T1_47							bleached Pc	1	2014PR46T2_6			bleached Pd	1	2014PR46T2_17			bleached Pc
										bleached Pc	1	2014 PR46 T1_5			Coralline algae	1	2014 PR46 T1_12			bleached Pc	1	2014 PR46 T1_29			Coralline algae	1	2014 PR46 T1_31			bleached Pc	1	2014 PR46 T1_47							bleached Pc	1	2014PR46T2_6			bleached Pd	1	2014PR46T2_18			bleached Pc
										bleached Pc	1	2014 PR46 T1_5			Coralline algae	1	2014 PR46 T1_12			bleached Pc	1	2014 PR46 T1_29			Coralline algae	1	2014 PR46 T1_31			bleached Pc	1	2014 PR46 T1_47							bleached Pc	1	2014PR46T2_7			bleached Pd	1	2014PR46T2_18			bleached Pc
										Coralline algae	1	2014 PR46 T1_10			Coralline algae	1	2014 PR46 T1_12			bleached Pc	1	2014 PR46 T1_29			Coralline algae	1	2014 PR46 T1_31			bleached Pc	1	2014 PR46 T1_47							bleached Pc	1	2014PR46T2_7			bleached Pd	1	2014PR46T2_18			bleached Pc
										Coralline algae	1	2014 PR46 T1_10			Coralline algae	1	2014 PR46 T1_12			bleached Pc	1	2014 PR46 T1_29			Coralline algae	1	2014 PR46 T1_31			bleached Pc	1	2014 PR46 T1_47							bleached Pc	1	2014PR46T2_7			bleached Pd	1	2014PR46T2_18			bleached Pc
										Coralline algae	1	2014 PR46 T1_10			Coralline algae	1	2014 PR46 T1_12			bleached Pc	1	2014 PR46 T1_29			Coralline algae	1	2014 PR46 T1_31			bleached Pc	1	2014 PR46 T1_47							bleached Pc	1	2014PR46T2_7			bleached Pd	1	2014PR46T2_18			bleached Pc
										Coralline algae	1	2014 PR46 T1_10			Coralline algae	1	2014 PR46 T1_12			bleached Pc	1	2014 PR46 T1_29			Coralline algae	1	2014 PR46 T1_31			bleached Pc	1	2014 PR46 T1_47							bleached Pc	1	2014PR46T2_7			bleached Pd	1	2014PR46T2_18			bleached Pc
										Coralline algae	1	2014 PR46 T1_10			Coralline algae	1	2014 PR46 T1_13			bleached Pc	1	2014 PR46 T1_29			Coralline algae	1	2014 PR46 T1_31			bleached Pc	1	2014 PR46 T1_47							bleached Pc	1	2014PR46T2_7			bleached Pd	1	2014PR46T2_18			bleached Pc
										Coralline algae	1	2014 PR46 T1_10			Coralline algae	1	2014 PR46 T1_13			bleached Pc	1	2014 PR46 T1_29			Coralline algae	1	2014 PR46 T1_31			bleached Pc	1	2014 PR46 T1_47							bleached Pc	1	2014PR46T2_7			bleached Pd	1	2014PR46T2_18			bleached Pc
										Coralline algae	1	2014 PR46 T1_10			Coralline algae	1	2014 PR46 T1_13			bleached Pc	1	2014 PR46 T1_29			Coralline algae	1	2014 PR46 T1_31			bleached Pc	1	2014 PR46 T1_47							bleached Pc	1	2014PR46T2_7			bleached Pd	1	2014PR46T2_18			bleached Pc
										Coralline algae	1	2014 PR46 T1_2			Coralline algae	1	2014 PR46 T1_13			bleached Pc	1	2014 PR46 T1_29			Coralline algae	1	2014 PR46 T1_31			bleached Pc	1	2014 PR46 T1_47							bleached Pc	1	2014PR46T2_7			bleached Pd	1	2014PR46T2_18			bleached Pc
										Coralline algae	1	2014 PR46 T1_2			Coralline algae	1	2014 PR46 T1_13			bleached Pc	1	2014 PR46 T1_29			Coralline algae	1	2014 PR46 T1_31			bleached Pc	1	2014 PR46 T1_47							bleached Pc	1	2014PR46T2_7			Coralline algae	1	2014PR46T2_11			bleached Pc
										Coralline algae	1	2014 PR46 T1_2			Coralline algae	1	2014 PR46 T1_13			bleached Pc	1	2014 PR46 T1_29			Coralline algae	1	2014 PR46 T1_31			bleached Pc	1	2014 PR46 T1_47							bleached Pc	1	2014PR46T2_7			Coralline algae	1	2014PR46T2_11			bleached Pc
										Coralline algae	1	2014 PR46 T1_2			Coralline algae	1	2014 PR46 T1_13			bleached Pc	1	2014 PR46 T1_29			Coralline algae	1	2014 PR46 T1_31			bleached Pc	1	2014 PR46 T1_48							bleached Pc	1	2014PR46T2_7			Coralline algae	1	2014PR46T2_11			bleached Pc
										Coralline algae	1	2014 PR46 T1_2			Coralline algae	1	2014 PR46 T1_13			bleached Pc	1	2014 PR46 T1_30			Coralline algae	1	2014 PR46 T1_31			bleached Pc	1	2014 PR46 T1_48							bleached Pc	1	2014PR46T2_7			Coralline algae	1	2014PR46T2_11			bleached Pc
										Coralline algae	1	2014 PR46 T1_3			Coralline algae	1	2014 PR46 T1_13			bleached Pc	1	2014 PR46 T1_30			Coralline algae	1	2014 PR46 T1_31			bleached Pc	1	2014 PR46 T1_48							bleached Pc	1	2014PR46T2_7			Coralline algae	1	2014PR46T2_11			bleached Pc
										Coralline algae	1	2014 PR46 T1_3			Coralline algae	1	2014 PR46 T1_13			bleached Pc	1	2014 PR46 T1_30			Coralline algae	1	2014 PR46 T1_31			bleached Pc	1	2014 PR46 T1_48							bleached Pc	1	2014PR46T2_7			Coralline algae	1	2014PR46T2_11			bleached Pc
										Coralline algae	1	2014 PR46 T1_3			Coralline algae	1	2014 PR46 T1_13			bleached Pc	1	2014 PR46 T1_30			Coralline algae	1	2014 PR46 T1_32			bleached Pc	1	2014 PR46 T1_48							bleached Pc	1	2014PR46T2_7			Coralline algae	1	2014PR46T2_11			bleached Pc
										Coralline algae	1	2014 PR46 T1_3			Coralline algae	1	2014 PR46 T1_13			bleached Pc	1	2014 PR46 T1_30			Coralline algae	1	2014 PR46 T1_32			Coralline algae	1	2014 PR46 T1_42							bleached Pc	1	2014PR46T2_7			Coralline algae	1	2014PR46T2_11			bleached Pc
										Coralline algae	1	2014 PR46 T1_3			Coralline algae	1	2014 PR46 T1_13			bleached Pc	1	2014 PR46 T1_30			Coralline algae	1	2014 PR46 T1_32			Coralline algae	1	2014 PR46 T1_42							bleached Pc	1	2014PR46T2_8			Coralline algae	1	2014PR46T2_11			bleached Pc
										Coralline algae	1	2014 PR46 T1_3			Coralline algae	1	2014 PR46 T1_13			bleached Pc	1	2014 PR46 T1_30			Coralline algae	1	2014 PR46 T1_32			Coralline algae	1	2014 PR46 T1_42							bleached Pc	1	2014PR46T2_8			Coralline algae	1	2014PR46T2_11			bleached Pc
										Coralline algae	1	2014 PR46 T1_3			Coralline algae	1	2014 PR46 T1_13			bleached Pc	1	2014 PR46 T1_30			Coralline algae	1	2014 PR46 T1_32			Coralline algae	1	2014 PR46 T1_42							bleached Pc	1	2014PR46T2_8			Coralline algae	1	2014PR46T2_11			bleached Pc
										Coralline algae	1	2014 PR46 T1_3			Coralline algae	1	2014 PR46 T1_13			Coralline algae	1	2014 PR46 T1_21			Coralline algae	1	2014 PR46 T1_32			Coralline algae	1	2014 PR46 T1_42							bleached Pc	1	2014PR46T2_8			Coralline algae	1	2014PR46T2_11			bleached Pc
										Coralline algae	1	2014 PR46 T1_3			Coralline algae	1	2014 PR46 T1_13			Coralline algae	1	2014 PR46 T1_21			Coralline algae	1	2014 PR46 T1_33			Coralline algae	1	2014 PR46 T1_42							bleached Pc	1	2014PR46T2_8			Coralline algae	1	2014PR46T2_11			bleached Pc
										Coralline algae	1	2014 PR46 T1_3			Coralline algae	1	2014 PR46 T1_13			Coralline algae	1	2014 PR46 T1_21			Coralline algae	1	2014 PR46 T1_33			Coralline algae	1	2014 PR46 T1_43							bleached Pc	1	2014PR46T2_8			Coralline algae	1	2014PR46T2_11			Coralline algae
										Coralline algae	1	2014 PR46 T1_4			Coralline algae	1	2014 PR46 T1_13			Coralline algae	1	2014 PR46 T1_21			Coralline algae	1	2014 PR46 T1_33			Coralline algae	1	2014 PR46 T1_43							bleached Pc	1	2014PR46T2_8			Coralline algae	1	2014PR46T2_11			Coralline algae
										Coralline algae	1	2014 PR46 T1_4			Coralline algae	1	2014 PR46 T1_14			Coralline algae	1	2014 PR46 T1_21			Coralline algae	1	2014 PR46 T1_34			Coralline algae	1	2014 PR46 T1_43							bleached Pc	1	2014PR46T2_8			Coralline algae	1	2014PR46T2_11			Coralline algae
										Coralline algae	1	2014 PR46 T1_4			Coralline algae	1	2014 PR46 T1_14			Coralline algae	1	2014 PR46 T1_21			Coralline algae	1	2014 PR46 T1_34			Coralline algae	1	2014 PR46 T1_43							bleached Pc	1	2014PR46T2_8			Coralline algae	1	2014PR46T2_11			Coralline algae
										Coralline algae	1	2014 PR46 T1_4			Coralline algae	1	2014 PR46 T1_14			Coralline algae	1	2014 PR46 T1_21			Coralline algae	1	2014 PR46 T1_34			Coralline algae	1	2014 PR46 T1_43							bleached Pc	1	2014PR46T2_8			Coralline algae	1	2014PR46T2_11			Coralline algae
										Coralline algae	1	2014 PR46 T1_4			Coralline algae	1	2014 PR46 T1_14			Coralline algae	1	2014 PR46 T1_21			Coralline algae	1	2014 PR46 T1_34			Coralline algae	1	2014 PR46 T1_43							bleached Pc	1	2014PR46T2_8			Coralline algae	1	2014PR46T2_12			Coralline algae
										Coralline algae	1	2014 PR46 T1_4			Coralline algae	1	2014 PR46 T1_14			Coralline algae	1	2014 PR46 T1_21			Coralline algae	1	2014 PR46 T1_34			Coralline algae	1	2014 PR46 T1_43							bleached Pc	1	2014PR46T2_8			Coralline algae	1	2014PR46T2_12			Coralline algae
										Coralline algae	1	2014 PR46 T1_4			Coralline algae	1	2014 PR46 T1_14			Coralline algae	1	2014 PR46 T1_21			Coralline algae	1	2014 PR46 T1_34			Coralline algae	1	2014 PR46 T1_43							bleached Pc	1	2014PR46T2_8			Coralline algae	1	2014PR46T2_12			Coralline algae
										Coralline algae	1	2014 PR46 T1_4			Coralline algae	1	2014 PR46 T1_14			Coralline algae	1	2014 PR46 T1_21			Coralline algae	1	2014 PR46 T1_34			Coralline algae	1	2014 PR46 T1_43							bleached Pc	1	2014PR46T2_8			Coralline algae	1	2014PR46T2_12			Coralline algae
										Coralline algae	1	2014 PR46 T1_4			Coralline algae	1	2014 PR46 T1_14			Coralline algae	1	2014 PR46 T1_21			Coralline algae	1	2014 PR46 T1_34			Coralline algae	1	2014 PR46 T1_43							bleached Pc	1	2014PR46T2_8			Coralline algae	1	2014PR46T2_12			Coralline algae
										Coralline algae	1	2014 PR46 T1_4			Coralline algae	1	2014 PR46 T1_14			Coralline algae	1	2014 PR46 T1_21			Coralline algae	1	2014 PR46 T1_34			Coralline algae	1	2014 PR46 T1_43							bleached Pc	1	2014PR46T2_9			Coralline algae	1	2014PR46T2_12			Coralline algae
										Coralline algae	1	2014 PR46 T1_4			Coralline algae	1	2014 PR46 T1_15			Coralline algae	1	2014 PR46 T1_21			Coralline algae	1	2014 PR46 T1_34			Coralline algae	1	2014 PR46 T1_45							bleached Pc	1	2014PR46T2_9			Coralline algae	1	2014PR46T2_12			Coralline algae
										Coralline algae	1	2014 PR46 T1_4			Coralline algae	1	2014 PR46 T1_15			Coralline algae	1	2014 PR46 T1_22			Coralline algae	1	2014 PR46 T1_34			Coralline algae	1	2014 PR46 T1_45							bleached Pc	1	2014PR46T2_9			Coralline algae	1	2014PR46T2_12			Coralline algae
										Coralline algae	1	2014 PR46 T1_4			Coralline algae	1	2014 PR46 T1_15			Coralline algae	1	2014 PR46 T1_22			Coralline algae	1	2014 PR46 T1_34			Coralline algae	1	2014 PR46 T1_47							bleached Pc	1	2014PR46T2_9			Coralline algae	1	2014PR46T2_12			Coralline algae
										Coralline algae	1	2014 PR46 T1_4			Coralline algae	1	2014 PR46 T1_15			Coralline algae	1	2014 PR46 T1_22			Coralline algae	1	2014 PR46 T1_34			Coralline algae	1	2014 PR46 T1_48							bleached Pc	1	2014PR46T2_9			Coralline algae	1	2014PR46T2_12			Coralline algae
										Coralline algae	1	2014 PR46 T1_4			Coralline algae	1	2014 PR46 T1_15			Coralline algae	1	2014 PR46 T1_22			Coralline algae	1	2014 PR46 T1_34			Coralline algae	1	2014 PR46 T1_48							bleached Pc	1	2014PR46T2_9			Coralline algae	1	2014PR46T2_12			Coralline algae
										Coralline algae	1	2014 PR46 T1_4			Coralline algae	1	2014 PR46 T1_15			Coralline algae	1	2014 PR46 T1_22			Coralline algae	1	2014 PR46 T1_34			Coralline algae	1	2014 PR46 T1_48							bleached Pc	1	2014PR46T2_9			Coralline algae	1	2014PR46T2_12			Coralline algae
										Coralline algae	1	2014 PR46 T1_4			Coralline algae	1	2014 PR46 T1_15			Coralline algae	1	2014 PR46 T1_22			Coralline algae	1	2014 PR46 T1_34			Coralline algae	1	2014 PR46 T1_48							bleached Pc	1	2014PR46T2_9			Coralline algae	1	2014PR46T2_12			Coralline algae
										Coralline algae	1	2014 PR46 T1_4			Coralline algae	1	2014 PR46 T1_15			Coralline algae	1	2014 PR46 T1_22			Coralline algae	1	2014 PR46 T1_34			Coralline algae	1	2014 PR46 T1_49							bleached Pc	1	2014PR46T2_9			Coralline algae	1	2014PR46T2_12			Coralline algae
										Coralline algae	1	2014 PR46 T1_4			Coralline algae	1	2014 PR46 T1_15			Coralline algae	1	2014 PR46 T1_22			Coralline algae	1	2014 PR46 T1_34			Coralline algae	1	2014 PR46 T1_49							bleached Pc	1	2014PR46T2_9			Coralline algae	1	2014PR46T2_12			Coralline algae
										Coralline algae	1	2014 PR46 T1_4			Coralline algae	1	2014 PR46 T1_15			Coralline algae	1	2014 PR46 T1_22			Coralline algae	1	2014 PR46 T1_34			Coralline algae	1	2014 PR46 T1_49							bleached Pc	1	2014PR46T2_9			Coralline algae	1	2014PR46T2_12			Coralline algae
										Coralline algae	1	2014 PR46 T1_4			Coralline algae	1	2014 PR46 T1_15			Coralline algae	1	2014 PR46 T1_22			Coralline algae	1	2014 PR46 T1_35			Coralline algae	1	2014 PR46 T1_49							bleached Pc	1	2014PR46T2_4			Coralline algae	1	2014PR46T2_12			Coralline algae
										Coralline algae	1	2014 PR46 T1_6			Coralline algae	1	2014 PR46 T1_15			Coralline algae	1	2014 PR46 T1_22			Coralline algae	1	2014 PR46 T1_35			Coralline algae	1	2014 PR46 T1_49							bleached Pc	1	2014PR46T2_4			Coralline algae	1	2014PR46T2_12			Coralline algae
										Coralline algae	1	2014 PR46 T1_6			Coralline algae	1	2014 PR46 T1_15			Coralline algae	1	2014 PR46 T1_22			Coralline algae	1	2014 PR46 T1_35			Coralline algae	1	2014 PR46 T1_50							bleached Pc	1	2014PR46T2_4			Coralline algae	1	2014PR46T2_12			Coralline algae
										Coralline algae	1	2014 PR46 T1_6			Coralline algae	1	2014 PR46 T1_15			Coralline algae	1	2014 PR46 T1_22			Coralline algae	1	2014 PR46 T1_35			Coralline algae	1	2014 PR46 T1_50							bleached Pc	1	2014PR46T2_4			Coralline algae	1	2014PR46T2_13			Coralline algae
										Coralline algae	1	2014 PR46 T1_6			Coralline algae	1	2014 PR46 T1_15			Coralline algae	1	2014 PR46 T1_22			Coralline algae	1	2014 PR46 T1_35			Coralline algae	1	2014 PR46 T1_50							bleached Pc	1	2014PR46T2_4			Coralline algae	1	2014PR46T2_13			Coralline algae
										Coralline algae	1	2014 PR46 T1_6			Coralline algae	1	2014 PR46 T1_15			Coralline algae	1	2014 PR46 T1_22			Coralline algae	1	2014 PR46 T1_35			Coralline algae	1	2014 PR46 T1_50							bleached Pc	1	2014PR46T2_4			Coralline algae	1	2014PR46T2_13			Coralline algae
										Coralline algae	1	2014 PR46 T1_6			Coralline algae	1	2014 PR46 T1_15			Coralline algae	1	2014 PR46 T1_22			Coralline algae	1	2014 PR46 T1_35			Coralline algae	1	2014 PR46 T1_50							bleached Pc	1	2014PR46T2_4			Coralline algae	1	2014PR46T2_13			Coralline algae
										Coralline algae	1	2014 PR46 T1_6			Coralline algae	1	2014 PR46 T1_15			Coralline algae	1	2014 PR46 T1_22			Coralline algae	1	2014 PR46 T1_35			Coralline algae	1	2014 PR46 T1_50							bleached Pc	1	2014PR46T2_4			Coralline algae	1	2014PR46T2_13			Coralline algae
										Coralline algae	1	2014 PR46 T1_6			Coralline algae	1	2014 PR46 T1_16			Coralline algae	1	2014 PR46 T1_22			Coralline algae	1	2014 PR46 T1_35			Coralline algae	1	2014 PR46 T1_50							Coralline algae	1	2014PR46T2_10			Coralline algae	1	2014PR46T2_13			Coralline algae
										Coralline algae	1	2014 PR46 T1_6			Coralline algae	1	2014 PR46 T1_16			Coralline algae	1	2014 PR46 T1_22			Coralline algae	1	2014 PR46 T1_35			Coralline algae	1	2014 PR46 T1_50							Coralline algae	1	2014PR46T2_10			Coralline algae	1	2014PR46T2_13			Coralline algae
										Coralline algae	1	2014 PR46 T1_6			Coralline algae	1	2014 PR46 T1_16			Coralline algae	1	2014 PR46 T1_22			Coralline algae	1	2014 PR46 T1_35			Coralline algae	1	2014 PR46 T1_50							Coralline algae	1	2014PR46T2_10			Coralline algae	1	2014PR46T2_13			Coralline algae
										Coralline algae	1	2014 PR46 T1_6			Coralline algae	1	2014 PR46 T1_16			Coralline algae	1	2014 PR46 T1_22			Coralline algae	1	2014 PR46 T1_35			Coralline algae	1	2014 PR46 T1_50							Coralline algae	1	2014PR46T2_10			Coralline algae	1	2014PR46T2_13			Coralline algae
										Coralline algae	1	2014 PR46 T1_6			Coralline algae	1	2014 PR46 T1_16			Coralline algae	1	2014 PR46 T1_22			Coralline algae	1	2014 PR46 T1_35			Culcita novaeguineae	1	2014 PR46 T1_48							Coralline algae	1	2014PR46T2_2			Coralline algae	1	2014PR46T2_13			Coralline algae
										Coralline algae	1	2014 PR46 T1_6			Coralline algae	1	2014 PR46 T1_16			Coralline algae	1	2014 PR46 T1_22			Coralline algae	1	2014 PR46 T1_35			Culcita novaeguineae	1	2014 PR46 T1_48							Coralline algae	1	2014PR46T2_2			Coralline algae	1	2014PR46T2_13			Coralline algae
										Coralline algae	1	2014 PR46 T1_6			Coralline algae	1	2014 PR46 T1_16			Coralline algae	1	2014 PR46 T1_23			Coralline algae	1	2014 PR46 T1_35			Culcita novaeguineae	1	2014 PR46 T1_49							Coralline algae	1	2014PR46T2_2			Coralline algae	1	2014PR46T2_13			Coralline algae
										Coralline algae	1	2014 PR46 T1_7			Coralline algae	1	2014 PR46 T1_16			Coralline algae	1	2014 PR46 T1_23			Coralline algae	1	2014 PR46 T1_35			Culcita novaeguineae	1	2014 PR46 T1_49							Coralline algae	1	2014PR46T2_2			Coralline algae	1	2014PR46T2_13			Coralline algae
										Coralline algae	1	2014 PR46 T1_7			Coralline algae	1	2014 PR46 T1_16			Coralline algae	1	2014 PR46 T1_23			Coralline algae	1	2014 PR46 T1_35			Culcita novaeguineae	1	2014 PR46 T1_49							Coralline algae	1	2014PR46T2_3			Coralline algae	1	2014PR46T2_13			Coralline algae
										Coralline algae	1	2014 PR46 T1_7			Coralline algae	1	2014 PR46 T1_16			Coralline algae	1	2014 PR46 T1_23			Coralline algae	1	2014 PR46 T1_35			Culcita novaeguineae	1	2014 PR46 T1_49							Coralline algae	1	2014PR46T2_3			Coralline algae	1	2014PR46T2_13			Coralline algae
										Coralline algae	1	2014 PR46 T1_7			Coralline algae	1	2014 PR46 T1_16			Coralline algae	1	2014 PR46 T1_23			Coralline algae	1	2014 PR46 T1_35			Culcita novaeguineae	1	2014 PR46 T1_50							Coralline algae	1	2014PR46T2_3			Coralline algae	1	2014PR46T2_13			Coralline algae
										Coralline algae	1	2014 PR46 T1_7			Coralline algae	1	2014 PR46 T1_16			Coralline algae	1	2014 PR46 T1_23			Coralline algae	1	2014 PR46 T1_35			Macroalgae	1	2014 PR46 T1_48							Coralline algae	1	2014PR46T2_3			Coralline algae	1	2014PR46T2_13			Coralline algae
										Coralline algae	1	2014 PR46 T1_7			Coralline algae	1	2014 PR46 T1_16			Coralline algae	1	2014 PR46 T1_23			Coralline algae	1	2014 PR46 T1_35			Macroalgae	1	2014 PR46 T1_48							Coralline algae	1	2014PR46T2_3			Coralline algae	1	2014PR46T2_13			Coralline algae
										Coralline algae	1	2014 PR46 T1_7			Coralline algae	1	2014 PR46 T1_16			Coralline algae	1	2014 PR46 T1_23			Coralline algae	1	2014 PR46 T1_35			Macroalgae	1	2014 PR46 T1_48							Coralline algae	1	2014PR46T2_3			Coralline algae	1	2014PR46T2_13			Coralline algae
										Coralline algae	1	2014 PR46 T1_7			Coralline algae	1	2014 PR46 T1_16			Coralline algae	1	2014 PR46 T1_23			Coralline algae	1	2014 PR46 T1_35			Macroalgae	1	2014 PR46 T1_48							Coralline algae	1	2014PR46T2_3			Coralline algae	1	2014PR46T2_13			Coralline algae
										Coralline algae	1	2014 PR46 T1_7			Coralline algae	1	2014 PR46 T1_16			Coralline algae	1	2014 PR46 T1_23			Coralline algae	1	2014 PR46 T1_35			Macroalgae	1	2014 PR46 T1_48							Coralline algae	1	2014PR46T2_3			Coralline algae	1	2014PR46T2_14			Coralline algae
										Coralline algae	1	2014 PR46 T1_7			Coralline algae	1	2014 PR46 T1_16			Coralline algae	1	2014 PR46 T1_23			Coralline algae	1	2014 PR46 T1_36			Macroalgae	1	2014 PR46 T1_48							Coralline algae	1	2014PR46T2_5			Coralline algae	1	2014PR46T2_14			Coralline algae
										Coralline algae	1	2014 PR46 T1_8			Coralline algae	1	2014 PR46 T1_17			Coralline algae	1	2014 PR46 T1_23			Coralline algae	1	2014 PR46 T1_36			Macroalgae	1	2014 PR46 T1_49							Coralline algae	1	2014PR46T2_5			Coralline algae	1	2014PR46T2_14			Coralline algae
										Coralline algae	1	2014 PR46 T1_8			Coralline algae	1	2014 PR46 T1_17			Coralline algae	1	2014 PR46 T1_23			Coralline algae	1	2014 PR46 T1_36			Macroalgae	1	2014 PR46 T1_49							Coralline algae	1	2014PR46T2_5			Coralline algae	1	2014PR46T2_14			Coralline algae
										Coralline algae	1	2014 PR46 T1_8			Coralline algae	1	2014 PR46 T1_17			Coralline algae	1	2014 PR46 T1_23			Coralline algae	1	2014 PR46 T1_36			Macroalgae	1	2014 PR46 T1_49							Coralline algae	1	2014PR46T2_6			Coralline algae	1	2014PR46T2_14			Coralline algae
										Coralline algae	1	2014 PR46 T1_8			Coralline algae	1	2014 PR46 T1_17			Coralline algae	1	2014 PR46 T1_24			Coralline algae	1	2014 PR46 T1_36			Macroalgae	1	2014 PR46 T1_49							Coralline algae	1	2014PR46T2_6			Coralline algae	1	2014PR46T2_14			Coralline algae
										Coralline algae	1	2014 PR46 T1_8			Coralline algae	1	2014 PR46 T1_17			Coralline algae	1	2014 PR46 T1_24			Coralline algae	1	2014 PR46 T1_36			Macroalgae	1	2014 PR46 T1_49							Coralline algae	1	2014PR46T2_6			Coralline algae	1	2014PR46T2_14			Coralline algae
										Coralline algae	1	2014 PR46 T1_8			Coralline algae	1	2014 PR46 T1_17			Coralline algae	1	2014 PR46 T1_24			Coralline algae	1	2014 PR46 T1_36			Macroalgae	1	2014 PR46 T1_49							Coralline algae	1	2014PR46T2_6			Coralline algae	1	2014PR46T2_14			Coralline algae
										Coralline algae	1	2014 PR46 T1_8			Coralline algae	1	2014 PR46 T1_18			Coralline algae	1	2014 PR46 T1_24			Coralline algae	1	2014 PR46 T1_36			Macroalgae	1	2014 PR46 T1_49							Coralline algae	1	2014PR46T2_6			Coralline algae	1	2014PR46T2_14			Coralline algae
										Coralline algae	1	2014 PR46 T1_8			Coralline algae	1	2014 PR46 T1_18			Coralline algae	1	2014 PR46 T1_24			Coralline algae	1	2014 PR46 T1_36			Macroalgae	1	2014 PR46 T1_49							Coralline algae	1	2014PR46T2_6			Coralline algae	1	2014PR46T2_14			Coralline algae
										Coralline algae	1	2014 PR46 T1_8			Coralline algae	1	2014 PR46 T1_18			Coralline algae	1	2014 PR46 T1_24			Coralline algae	1	2014 PR46 T1_36			Macroalgae	1	2014 PR46 T1_49							Coralline algae	1	2014PR46T2_6			Coralline algae	1	2014PR46T2_14			Coralline algae
										Coralline algae	1	2014 PR46 T1_8			Coralline algae	1	2014 PR46 T1_18			Coralline algae	1	2014 PR46 T1_24			Coralline algae	1	2014 PR46 T1_36			Macroalgae	1	2014 PR46 T1_49							Coralline algae	1	2014PR46T2_6			Coralline algae	1	2014PR46T2_14			Coralline algae
										Coralline algae	1	2014 PR46 T1_8			Coralline algae	1	2014 PR46 T1_18			Coralline algae	1	2014 PR46 T1_24			Coralline algae	1	2014 PR46 T1_36			Macroalgae	1	2014 PR46 T1_49							Coralline algae	1	2014PR46T2_7			Coralline algae	1	2014PR46T2_14			Coralline algae
										Coralline algae	1	2014 PR46 T1_8			Coralline algae	1	2014 PR46 T1_18			Coralline algae	1	2014 PR46 T1_25			Coralline algae	1	2014 PR46 T1_36			Macroalgae	1	2014 PR46 T1_49							Coralline algae	1	2014PR46T2_7			Coralline algae	1	2014PR46T2_14			Coralline algae
										Coralline algae	1	2014 PR46 T1_8			Coralline algae	1	2014 PR46 T1_18			Coralline algae	1	2014 PR46 T1_25			Coralline algae	1	2014 PR46 T1_36			Macroalgae	1	2014 PR46 T1_49							Coralline algae	1	2014PR46T2_7			Coralline algae	1	2014PR46T2_14			Coralline algae
										Coralline algae	1	2014 PR46 T1_9			Coralline algae	1	2014 PR46 T1_18			Coralline algae	1	2014 PR46 T1_25			Coralline algae	1	2014 PR46 T1_36			Macroalgae	1	2014 PR46 T1_50							Coralline algae	1	2014PR46T2_7			Coralline algae	1	2014PR46T2_14			Coralline algae
										Coralline algae	1	2014 PR46 T1_9			Coralline algae	1	2014 PR46 T1_18			Coralline algae	1	2014 PR46 T1_25			Coralline algae	1	2014 PR46 T1_36			Macroalgae	1	2014 PR46 T1_50							Coralline algae	1	2014PR46T2_9			Coralline algae	1	2014PR46T2_14			Coralline algae
										Coralline algae	1	2014 PR46 T1_9			Coralline algae	1	2014 PR46 T1_18			Coralline algae	1	2014 PR46 T1_25			Coralline algae	1	2014 PR46 T1_36			Macroalgae	1	2014 PR46 T1_50							Coralline algae	1	2014PR46T2_9			Coralline algae	1	2014PR46T2_14			Coralline algae
										Coralline algae	1	2014 PR46 T1_9			Coralline algae	1	2014 PR46 T1_18			Coralline algae	1	2014 PR46 T1_25			Coralline algae	1	2014 PR46 T1_36			Macroalgae	1	2014 PR46 T1_50							Coralline algae	1	2014PR46T2_9			Coralline algae	1	2014PR46T2_14			Coralline algae
										Coralline algae	1	2014 PR46 T1_9			Coralline algae	1	2014 PR46 T1_18			Coralline algae	1	2014 PR46 T1_25			Coralline algae	1	2014 PR46 T1_39			Macroalgae	1	2014 PR46 T1_50							Coralline algae	1	2014PR46T2_4			Coralline algae	1	2014PR46T2_14			Coralline algae
										Coralline algae	1	2014 PR46 T1_9			Coralline algae	1	2014 PR46 T1_18			Coralline algae	1	2014 PR46 T1_25			Coralline algae	1	2014 PR46 T1_39			Macroalgae	1	2014 PR46 T1_50							Coralline algae	1	2014PR46T2_4			Coralline algae	1	2014PR46T2_14			Coralline algae
										Coralline algae	1	2014 PR46 T1_9			Coralline algae	1	2014 PR46 T1_18			Coralline algae	1	2014 PR46 T1_25			Coralline algae	1	2014 PR46 T1_39			Macroalgae	1	2014 PR46 T1_50							Coralline algae	1	2014PR46T2_4			Coralline algae	1	2014PR46T2_14			Coralline algae
										Coralline algae	1	2014 PR46 T1_9			Coralline algae	1	2014 PR46 T1_18			Coralline algae	1	2014 PR46 T1_25			Coralline algae	1	2014 PR46 T1_39			Porites compressa	1	2014 PR46 T1_42							Bleached Mc	1	2014PR46T2_5			Coralline algae	1	2014PR46T2_14			Coralline algae
										Coralline algae	1	2014 PR46 T1_9			Coralline algae	1	2014 PR46 T1_18			Coralline algae	1	2014 PR46 T1_25			Coralline algae	1	2014 PR46 T1_39			Porites compressa	1	2014 PR46 T1_43							Bleached Mc	1	2014PR46T2_5			Coralline algae	1	2014PR46T2_15			Coralline algae
										Coralline algae	1	2014 PR46 T1_9			Coralline algae	1	2014 PR46 T1_18			Coralline algae	1	2014 PR46 T1_25			Coralline algae	1	2014 PR46 T1_39			Porites compressa	1	2014 PR46 T1_43							Macroalgae	1	2014PR46T2_10			Coralline algae	1	2014PR46T2_15			Coralline algae
										Coralline algae	1	2014 PR46 T1_9			Coralline algae	1	2014 PR46 T1_19			Coralline algae	1	2014 PR46 T1_25			Coralline algae	1	2014 PR46 T1_40			Porites compressa	1	2014 PR46 T1_43							Macroalgae	1	2014PR46T2_10			Coralline algae	1	2014PR46T2_15			Coralline algae
										Coralline algae	1	2014 PR46 T1_9			Coralline algae	1	2014 PR46 T1_19			Coralline algae	1	2014 PR46 T1_25			Coralline algae	1	2014 PR46 T1_40			Porites compressa	1	2014 PR46 T1_43							Macroalgae	1	2014PR46T2_7			Coralline algae	1	2014PR46T2_15			Coralline algae
										Coralline algae	1	2014 PR46 T1_9			Coralline algae	1	2014 PR46 T1_19			Coralline algae	1	2014 PR46 T1_25			Coralline algae	1	2014 PR46 T1_40			Porites compressa	1	2014 PR46 T1_43							Porites compressa	1	2014PR46T2_10			Coralline algae	1	2014PR46T2_15			Coralline algae
										Coralline algae	1	2014 PR46 T1_9			Coralline algae	1	2014 PR46 T1_19			Coralline algae	1	2014 PR46 T1_25			Coralline algae	1	2014 PR46 T1_40			Porites compressa	1	2014 PR46 T1_44							Porites compressa	1	2014PR46T2_10			Coralline algae	1	2014PR46T2_15			Coralline algae
										Coralline algae	1	2014 PR46 T1_9			Coralline algae	1	2014 PR46 T1_19			Coralline algae	1	2014 PR46 T1_25			Coralline algae	1	2014 PR46 T1_40			Porites compressa	1	2014 PR46 T1_44							Porites compressa	1	2014PR46T2_10			Coralline algae	1	2014PR46T2_15			Coralline algae
										Coralline algae	1	2014 PR46 T1_9			Coralline algae	1	2014 PR46 T1_19			Coralline algae	1	2014 PR46 T1_26			Coralline algae	1	2014 PR46 T1_40			Porites compressa	1	2014 PR46 T1_44							Porites compressa	1	2014PR46T2_10			Coralline algae	1	2014PR46T2_15			Coralline algae
										Coralline algae	1	2014 PR46 T1_9			Coralline algae	1	2014 PR46 T1_19			Coralline algae	1	2014 PR46 T1_26			Coralline algae	1	2014 PR46 T1_40			Porites compressa	1	2014 PR46 T1_44							Porites compressa	1	2014PR46T2_10			Coralline algae	1	2014PR46T2_15			Coralline algae
										Coralline algae	1	2014 PR46 T1_9			Coralline algae	1	2014 PR46 T1_19			Coralline algae	1	2014 PR46 T1_26			Coralline algae	1	2014 PR46 T1_40			Porites compressa	1	2014 PR46 T1_45							Porites compressa	1	2014PR46T2_10			Coralline algae	1	2014PR46T2_15			Coralline algae
										Coralline algae	1	2014 PR46 T1_9			Coralline algae	1	2014 PR46 T1_19			Coralline algae	1	2014 PR46 T1_26			Coralline algae	1	2014 PR46 T1_40			Porites compressa	1	2014 PR46 T1_45							Porites compressa	1	2014PR46T2_10			Coralline algae	1	2014PR46T2_15			Coralline algae
										Coralline algae	1	2014 PR46 T1_9			Coralline algae	1	2014 PR46 T1_19			Coralline algae	1	2014 PR46 T1_26			Coralline algae	1	2014 PR46 T1_40			Porites compressa	1	2014 PR46 T1_45							Porites compressa	1	2014PR46T2_2			Coralline algae	1	2014PR46T2_15			Coralline algae
										Coralline algae	1	2014 PR46 T1_9			Coralline algae	1	2014 PR46 T1_19			Coralline algae	1	2014 PR46 T1_26			Coralline algae	1	2014 PR46 T1_40			Porites compressa	1	2014 PR46 T1_45							Porites compressa	1	2014PR46T2_2			Coralline algae	1	2014PR46T2_15			Coralline algae
										Coralline algae	1	2014 PR46 T1_9			Coralline algae	1	2014 PR46 T1_19			Coralline algae	1	2014 PR46 T1_26			Coralline algae	1	2014 PR46 T1_40			Porites compressa	1	2014 PR46 T1_45							Porites compressa	1	2014PR46T2_2			Coralline algae	1	2014PR46T2_15			Coralline algae
										Coralline algae	1	2014 PR46 T1_9			Coralline algae	1	2014 PR46 T1_19			Coralline algae	1	2014 PR46 T1_26			Coralline algae	1	2014 PR46 T1_40			Porites compressa	1	2014 PR46 T1_45							Porites compressa	1	2014PR46T2_2			Coralline algae	1	2014PR46T2_15			Coralline algae
										Coralline algae	1	2014 PR46 T1_9			Coralline algae	1	2014 PR46 T1_19			Coralline algae	1	2014 PR46 T1_26			Coralline algae	1	2014 PR46 T1_40			Porites compressa	1	2014 PR46 T1_45							Porites compressa	1	2014PR46T2_2			Coralline algae	1	2014PR46T2_15			Coralline algae
										Coralline algae	1	2014 PR46 T1_9			Coralline algae	1	2014 PR46 T1_19			Coralline algae	1	2014 PR46 T1_26			Coralline algae	1	2014 PR46 T1_40			Porites compressa	1	2014 PR46 T1_45							Porites compressa	1	2014PR46T2_3			Coralline algae	1	2014PR46T2_15			Coralline algae
										Coralline algae	1	2014 PR46 T1_5			Coralline algae	1	2014 PR46 T1_19			Coralline algae	1	2014 PR46 T1_26			Coralline algae	1	2014 PR46 T1_40			Porites compressa	1	2014 PR46 T1_45							Porites compressa	1	2014PR46T2_3			Coralline algae	1	2014PR46T2_15			Coralline algae
										Coralline algae	1	2014 PR46 T1_5			Coralline algae	1	2014 PR46 T1_19			Coralline algae	1	2014 PR46 T1_26			Coralline algae	1	2014 PR46 T1_40			Porites compressa	1	2014 PR46 T1_47							Porites compressa	1	2014PR46T2_3			Coralline algae	1	2014PR46T2_15			Coralline algae
										Coralline algae	1	2014 PR46 T1_5			Coralline algae	1	2014 PR46 T1_19			Coralline algae	1	2014 PR46 T1_26			Coralline algae	1	2014 PR46 T1_40			Porites compressa	1	2014 PR46 T1_48							Porites compressa	1	2014PR46T2_3			Coralline algae	1	2014PR46T2_15			Coralline algae
										Coralline algae	1	2014 PR46 T1_5			Coralline algae	1	2014 PR46 T1_19			Coralline algae	1	2014 PR46 T1_26			Coralline algae	1	2014 PR46 T1_40			Porites compressa	1	2014 PR46 T1_48							Porites compressa	1	2014PR46T2_3			Coralline algae	1	2014PR46T2_15			Coralline algae
										Coralline algae	1	2014 PR46 T1_5			Coralline algae	1	2014 PR46 T1_20			Coralline algae	1	2014 PR46 T1_27			Coralline algae	1	2014 PR46 T1_40			Porites compressa	1	2014 PR46 T1_48							Porites compressa	1	2014PR46T2_3			Coralline algae	1	2014PR46T2_16			Coralline algae
										Coralline algae	1	2014 PR46 T1_5			Coralline algae	1	2014 PR46 T1_20			Coralline algae	1	2014 PR46 T1_27			Macroalgae	1	2014 PR46 T1_34			Porites compressa	1	2014 PR46 T1_48							Porites compressa	1	2014PR46T2_3			Coralline algae	1	2014PR46T2_16			Coralline algae
										Coralline algae	1	2014 PR46 T1_5			Coralline algae	1	2014 PR46 T1_20			Coralline algae	1	2014 PR46 T1_27			Macroalgae	1	2014 PR46 T1_34			Porites compressa	1	2014 PR46 T1_48							Porites compressa	1	2014PR46T2_3			Coralline algae	1	2014PR46T2_16			Coralline algae
										Coralline algae	1	2014 PR46 T1_5			Coralline algae	1	2014 PR46 T1_20			Coralline algae	1	2014 PR46 T1_27			Macroalgae	1	2014 PR46 T1_36			Porites compressa	1	2014 PR46 T1_48							Porites compressa	1	2014PR46T2_5			Coralline algae	1	2014PR46T2_16			Coralline algae
										Coralline algae	1	2014 PR46 T1_5			Coralline algae	1	2014 PR46 T1_20			Coralline algae	1	2014 PR46 T1_27			Macroalgae	1	2014 PR46 T1_40			Porites compressa	1	2014 PR46 T1_48							Porites compressa	1	2014PR46T2_5			Coralline algae	1	2014PR46T2_17			Coralline algae
										Coralline algae	1	2014 PR46 T1_5			Coralline algae	1	2014 PR46 T1_20			Coralline algae	1	2014 PR46 T1_27			Macroalgae	1	2014 PR46 T1_40			Porites compressa	1	2014 PR46 T1_49							Porites compressa	1	2014PR46T2_5			Coralline algae	1	2014PR46T2_17			Coralline algae
										Macroalgae	1	2014 PR46 T1_10			Coralline algae	1	2014 PR46 T1_20			Coralline algae	1	2014 PR46 T1_27			Porites compressa	1	2014 PR46 T1_32			Porites compressa	1	2014 PR46 T1_49							Porites compressa	1	2014PR46T2_5			Coralline algae	1	2014PR46T2_17			Coralline algae
										Macroalgae	1	2014 PR46 T1_10			Coralline algae	1	2014 PR46 T1_20			Coralline algae	1	2014 PR46 T1_27			Porites compressa	1	2014 PR46 T1_32			Porites compressa	1	2014 PR46 T1_49							Porites compressa	1	2014PR46T2_5			Coralline algae	1	2014PR46T2_17			Coralline algae
										Macroalgae	1	2014 PR46 T1_10			Coralline algae	1	2014 PR46 T1_20			Coralline algae	1	2014 PR46 T1_27			Porites compressa	1	2014 PR46 T1_32			recently dead	1	2014 PR46 T1_44							Porites compressa	1	2014PR46T2_5			Coralline algae	1	2014PR46T2_17			Coralline algae
										Macroalgae	1	2014 PR46 T1_4			Coralline algae	1	2014 PR46 T1_20			Coralline algae	1	2014 PR46 T1_27			Porites compressa	1	2014 PR46 T1_33			recently dead	1	2014 PR46 T1_44							Porites compressa	1	2014PR46T2_5			Coralline algae	1	2014PR46T2_17			Coralline algae
										Macroalgae	1	2014 PR46 T1_4			Coralline algae	1	2014 PR46 T1_20			Coralline algae	1	2014 PR46 T1_27			Porites compressa	1	2014 PR46 T1_33			recently dead	1	2014 PR46 T1_44							Porites compressa	1	2014PR46T2_5			Coralline algae	1	2014PR46T2_17			Coralline algae
										Macroalgae	1	2014 PR46 T1_5			Coralline algae	1	2014 PR46 T1_20			Coralline algae	1	2014 PR46 T1_27			Porites compressa	1	2014 PR46 T1_33			recently dead	1	2014 PR46 T1_46							Porites compressa	1	2014PR46T2_5			Coralline algae	1	2014PR46T2_17			Coralline algae
										Macroalgae	1	2014 PR46 T1_5			Coralline algae	1	2014 PR46 T1_20			Coralline algae	1	2014 PR46 T1_27			Porites compressa	1	2014 PR46 T1_33			recently dead	1	2014 PR46 T1_46							Porites compressa	1	2014PR46T2_5			Coralline algae	1	2014PR46T2_19			Coralline algae
										Macroalgae	1	2014 PR46 T1_5			Coralline algae	1	2014 PR46 T1_20			Coralline algae	1	2014 PR46 T1_28			Porites compressa	1	2014 PR46 T1_33			recently dead	1	2014 PR46 T1_46							Porites compressa	1	2014PR46T2_5			Coralline algae	1	2014PR46T2_19			Coralline algae
										Macroalgae	1	2014 PR46 T1_5			Coralline algae	1	2014 PR46 T1_20			Coralline algae	1	2014 PR46 T1_28			Porites compressa	1	2014 PR46 T1_33			recently dead	1	2014 PR46 T1_46							Porites compressa	1	2014PR46T2_5			Coralline algae	1	2014PR46T2_19			Coralline algae
										Macroalgae	1	2014 PR46 T1_5			Coralline algae	1	2014 PR46 T1_20			Coralline algae	1	2014 PR46 T1_29			Porites compressa	1	2014 PR46 T1_33			Substrate	1	2014 PR46 T1_42							Porites compressa	1	2014PR46T2_5			Coralline algae	1	2014PR46T2_20			Coralline algae
										Porites compressa	1	2014 PR46 T1_10			Coralline algae	1	2014 PR46 T1_20			Coralline algae	1	2014 PR46 T1_30			Porites compressa	1	2014 PR46 T1_33			Substrate	1	2014 PR46 T1_42							Porites compressa	1	2014PR46T2_5			Coralline algae	1	2014PR46T2_20			Coralline algae
										Porites compressa	1	2014 PR46 T1_10			Coralline algae	1	2014 PR46 T1_20			Coralline algae	1	2014 PR46 T1_30			Porites compressa	1	2014 PR46 T1_33			Substrate	1	2014 PR46 T1_42							Porites compressa	1	2014PR46T2_5			Coralline algae	1	2014PR46T2_20			Coralline algae
										Porites compressa	1	2014 PR46 T1_10			Coralline algae	1	2014 PR46 T1_20			Coralline algae	1	2014 PR46 T1_30			Porites compressa	1	2014 PR46 T1_33			Substrate	1	2014 PR46 T1_43							Porites compressa	1	2014PR46T2_5			Coralline algae	1	2014PR46T2_20			Coralline algae
										Porites compressa	1	2014 PR46 T1_10			Coralline algae	1	2014 PR46 T1_20			Macroalgae	1	2014 PR46 T1_21			Porites compressa	1	2014 PR46 T1_33			Substrate	1	2014 PR46 T1_43							Porites compressa	1	2014PR46T2_7			Coralline algae	1	2014PR46T2_20			Coralline algae
										Porites compressa	1	2014 PR46 T1_10			Macroalgae	1	2014 PR46 T1_12			Macroalgae	1	2014 PR46 T1_21			Porites compressa	1	2014 PR46 T1_33			Substrate	1	2014 PR46 T1_43							Porites compressa	1	2014PR46T2_7			Coralline algae	1	2014PR46T2_20			Coralline algae
										Porites compressa	1	2014 PR46 T1_10			Macroalgae	1	2014 PR46 T1_14			Macroalgae	1	2014 PR46 T1_21			Porites compressa	1	2014 PR46 T1_33			Substrate	1	2014 PR46 T1_43							Porites compressa	1	2014PR46T2_9			Coralline algae	1	2014PR46T2_20			Coralline algae
										Porites compressa	1	2014 PR46 T1_2			Macroalgae	1	2014 PR46 T1_15			Macroalgae	1	2014 PR46 T1_25			Porites compressa	1	2014 PR46 T1_33			Substrate	1	2014 PR46 T1_44							Porites compressa	1	2014PR46T2_9			Coralline algae	1	2014PR46T2_20			Coralline algae
										Porites compressa	1	2014 PR46 T1_2			Macroalgae	1	2014 PR46 T1_15			Macroalgae	1	2014 PR46 T1_25			Porites compressa	1	2014 PR46 T1_34			Substrate	1	2014 PR46 T1_44							Porites compressa	1	2014PR46T2_9			Coralline algae	1	2014PR46T2_20			Coralline algae
										Porites compressa	1	2014 PR46 T1_2			Macroalgae	1	2014 PR46 T1_16			Macroalgae	1	2014 PR46 T1_26			Porites compressa	1	2014 PR46 T1_34			Substrate	1	2014 PR46 T1_44							Porites compressa	1	2014PR46T2_9			Coralline algae	1	2014PR46T2_20			Coralline algae
										Porites compressa	1	2014 PR46 T1_3			Macroalgae	1	2014 PR46 T1_16			Macroalgae	1	2014 PR46 T1_30			Porites compressa	1	2014 PR46 T1_36			Substrate	1	2014 PR46 T1_44							Porites compressa	1	2014PR46T2_9			Macroalgae	1	2014PR46T2_11			Coralline algae
										Porites compressa	1	2014 PR46 T1_3			Macroalgae	1	2014 PR46 T1_18			Porites compressa	1	2014 PR46 T1_21			recently dead	1	2014 PR46 T1_33			Substrate	1	2014 PR46 T1_44							Porites compressa	1	2014PR46T2_9			Macroalgae	1	2014PR46T2_16			Coralline algae
										Porites compressa	1	2014 PR46 T1_3			Macroalgae	1	2014 PR46 T1_18			Porites compressa	1	2014 PR46 T1_22			Substrate	1	2014 PR46 T1_31			Substrate	1	2014 PR46 T1_44							Porites compressa	1	2014PR46T2_9			Macroalgae	1	2014PR46T2_17			Coralline algae
										Porites compressa	1	2014 PR46 T1_6			Macroalgae	1	2014 PR46 T1_18			Porites compressa	1	2014 PR46 T1_23			Substrate	1	2014 PR46 T1_31			Substrate	1	2014 PR46 T1_44							Porites compressa	1	2014PR46T2_4			Macroalgae	1	2014PR46T2_19			Coralline algae
										Porites compressa	1	2014 PR46 T1_7			Macroalgae	1	2014 PR46 T1_18			Porites compressa	1	2014 PR46 T1_24			Substrate	1	2014 PR46 T1_31			Substrate	1	2014 PR46 T1_44							Porites compressa	1	2014PR46T2_4			Macroalgae	1	2014PR46T2_19			Coralline algae
										Porites compressa	1	2014 PR46 T1_7			Macroalgae	1	2014 PR46 T1_18			Porites compressa	1	2014 PR46 T1_24			Substrate	1	2014 PR46 T1_31			Substrate	1	2014 PR46 T1_44							Porites compressa	1	2014PR46T2_4			Macroalgae	1	2014PR46T2_19			Macroalgae
										Porites compressa	1	2014 PR46 T1_7			Macroalgae	1	2014 PR46 T1_18			Porites compressa	1	2014 PR46 T1_24			Substrate	1	2014 PR46 T1_31			Substrate	1	2014 PR46 T1_44							Porites compressa	1	2014PR46T2_4			Macroalgae	1	2014PR46T2_19			Porites compressa
										Porites compressa	1	2014 PR46 T1_7			Macroalgae	1	2014 PR46 T1_19			Porites compressa	1	2014 PR46 T1_24			Substrate	1	2014 PR46 T1_31			Substrate	1	2014 PR46 T1_45							Porites compressa	1	2014PR46T2_4			Macroalgae	1	2014PR46T2_19			Porites compressa
										Porites compressa	1	2014 PR46 T1_7			Macroalgae	1	2014 PR46 T1_19			Porites compressa	1	2014 PR46 T1_24			Substrate	1	2014 PR46 T1_32			Substrate	1	2014 PR46 T1_45							Porites compressa	1	2014PR46T2_4			Macroalgae	1	2014PR46T2_19			Porites compressa
										Porites compressa	1	2014 PR46 T1_7			Macroalgae	1	2014 PR46 T1_19			Porites compressa	1	2014 PR46 T1_24			Substrate	1	2014 PR46 T1_32			Substrate	1	2014 PR46 T1_45							Porites compressa	1	2014PR46T2_4			Macroalgae	1	2014PR46T2_19			Porites compressa
										Porites compressa	1	2014 PR46 T1_7			Macroalgae	1	2014 PR46 T1_20			Porites compressa	1	2014 PR46 T1_24			Substrate	1	2014 PR46 T1_32			Substrate	1	2014 PR46 T1_45							Porites compressa	1	2014PR46T2_4			Macroalgae	1	2014PR46T2_19			Porites compressa
										Porites compressa	1	2014 PR46 T1_8			Macroalgae	1	2014 PR46 T1_20			Porites compressa	1	2014 PR46 T1_24			Substrate	1	2014 PR46 T1_33			Substrate	1	2014 PR46 T1_45							Porites compressa	1	2014PR46T2_4			Macroalgae	1	2014PR46T2_19			Porites compressa
										Porites compressa	1	2014 PR46 T1_8			Porites compressa	1	2014 PR46 T1_11			Porites compressa	1	2014 PR46 T1_24			Substrate	1	2014 PR46 T1_33			Substrate	1	2014 PR46 T1_45							Porites compressa	1	2014PR46T2_4			Macroalgae	1	2014PR46T2_19			Porites compressa
										Porites compressa	1	2014 PR46 T1_8			Porites compressa	1	2014 PR46 T1_11			Porites compressa	1	2014 PR46 T1_24			Substrate	1	2014 PR46 T1_33			Substrate	1	2014 PR46 T1_45							Porites compressa	1	2014PR46T2_4			Macroalgae	1	2014PR46T2_19			Porites compressa
										Porites compressa	1	2014 PR46 T1_8			Porites compressa	1	2014 PR46 T1_11			Porites compressa	1	2014 PR46 T1_24			Substrate	1	2014 PR46 T1_33			Substrate	1	2014 PR46 T1_45							Porites compressa	1	2014PR46T2_4			Macroalgae	1	2014PR46T2_19			Porites compressa
										Porites compressa	1	2014 PR46 T1_8			Porites compressa	1	2014 PR46 T1_11			Porites compressa	1	2014 PR46 T1_26			Substrate	1	2014 PR46 T1_35			Substrate	1	2014 PR46 T1_46							recently dead	1	2014PR46T2_5			Macroalgae	1	2014PR46T2_19			Porites compressa
										Porites compressa	1	2014 PR46 T1_8			Porites compressa	1	2014 PR46 T1_11			Porites compressa	1	2014 PR46 T1_26			Substrate	1	2014 PR46 T1_39			Substrate	1	2014 PR46 T1_46							recently dead	1	2014PR46T2_5			Macroalgae	1	2014PR46T2_19			Porites compressa
										Porites compressa	1	2014 PR46 T1_8			Porites compressa	1	2014 PR46 T1_11			Porites compressa	1	2014 PR46 T1_27			Turf algae	1	2014 PR46 T1_31			Substrate	1	2014 PR46 T1_46							recently dead	1	2014PR46T2_8			Macroalgae	1	2014PR46T2_19			Porites compressa
										Porites compressa	1	2014 PR46 T1_8			Porites compressa	1	2014 PR46 T1_12			Porites compressa	1	2014 PR46 T1_27			Turf algae	1	2014 PR46 T1_32			Substrate	1	2014 PR46 T1_46							Substrate	1	2014PR46T2_10			Porites compressa	1	2014PR46T2_16			Porites compressa
										Porites compressa	1	2014 PR46 T1_8			Porites compressa	1	2014 PR46 T1_12			Porites compressa	1	2014 PR46 T1_28			Turf algae	1	2014 PR46 T1_32			Substrate	1	2014 PR46 T1_46							Substrate	1	2014PR46T2_10			Porites compressa	1	2014PR46T2_16			recently dead
										recently dead	1	2014 PR46 T1_2			Porites compressa	1	2014 PR46 T1_14			Porites compressa	1	2014 PR46 T1_29			Turf algae	1	2014 PR46 T1_32			Substrate	1	2014 PR46 T1_46							Substrate	1	2014PR46T2_10			Porites compressa	1	2014PR46T2_16			recently dead
										recently dead	1	2014 PR46 T1_2			Porites compressa	1	2014 PR46 T1_14			Porites compressa	1	2014 PR46 T1_29			Turf algae	1	2014 PR46 T1_33			Substrate	1	2014 PR46 T1_46							Substrate	1	2014PR46T2_2			Porites compressa	1	2014PR46T2_16			recently dead
										Substrate	1	2014 PR46 T1_10			Porites compressa	1	2014 PR46 T1_14			Porites compressa	1	2014 PR46 T1_30			Turf algae	1	2014 PR46 T1_34			Substrate	1	2014 PR46 T1_47							Substrate	1	2014PR46T2_2			Porites compressa	1	2014PR46T2_16			recently dead
										Substrate	1	2014 PR46 T1_10			Porites compressa	1	2014 PR46 T1_14			Porites compressa	1	2014 PR46 T1_30								Substrate	1	2014 PR46 T1_47							Substrate	1	2014PR46T2_2			Porites compressa	1	2014PR46T2_17			recently dead
										Substrate	1	2014 PR46 T1_10			Porites compressa	1	2014 PR46 T1_15			Porites compressa	1	2014 PR46 T1_30								Substrate	1	2014 PR46 T1_47							Substrate	1	2014PR46T2_3			Porites compressa	1	2014PR46T2_17			recently dead
										Substrate	1	2014 PR46 T1_10			Porites compressa	1	2014 PR46 T1_17			Porites compressa	1	2014 PR46 T1_30								Substrate	1	2014 PR46 T1_47							Substrate	1	2014PR46T2_3			Porites compressa	1	2014PR46T2_17			recently dead
										Substrate	1	2014 PR46 T1_2			Porites compressa	1	2014 PR46 T1_17			Porites compressa	1	2014 PR46 T1_30								Substrate	1	2014 PR46 T1_47							Substrate	1	2014PR46T2_5			Porites compressa	1	2014PR46T2_17			recently dead
										Substrate	1	2014 PR46 T1_2			Porites compressa	1	2014 PR46 T1_17			Porites compressa	1	2014 PR46 T1_30								Substrate	1	2014 PR46 T1_47							Substrate	1	2014PR46T2_6			Porites compressa	1	2014PR46T2_18			recently dead
										Substrate	1	2014 PR46 T1_2			Porites compressa	1	2014 PR46 T1_17			Porites compressa	1	2014 PR46 T1_30								Substrate	1	2014 PR46 T1_48							Substrate	1	2014PR46T2_6			Porites compressa	1	2014PR46T2_18			recently dead
										Substrate	1	2014 PR46 T1_2			Porites compressa	1	2014 PR46 T1_17			recently dead	1	2014 PR46 T1_23								Substrate	1	2014 PR46 T1_50							Substrate	1	2014PR46T2_6			Porites compressa	1	2014PR46T2_18			recently dead
										Substrate	1	2014 PR46 T1_2			Porites compressa	1	2014 PR46 T1_17			recently dead	1	2014 PR46 T1_24								Substrate	1	2014 PR46 T1_50							Substrate	1	2014PR46T2_8			Porites compressa	1	2014PR46T2_18			recently dead
										Substrate	1	2014 PR46 T1_2			Porites compressa	1	2014 PR46 T1_17			recently dead	1	2014 PR46 T1_27								Substrate	1	2014 PR46 T1_50							Substrate	1	2014PR46T2_9			Porites compressa	1	2014PR46T2_19			recently dead
										Substrate	1	2014 PR46 T1_3			Porites compressa	1	2014 PR46 T1_18			recently dead	1	2014 PR46 T1_28								Substrate	1	2014 PR46 T1_50							Substrate	1	2014PR46T2_9			Porites compressa	1	2014PR46T2_20			recently dead
										Substrate	1	2014 PR46 T1_3			Substrate	1	2014 PR46 T1_11			recently dead	1	2014 PR46 T1_30								Substrate	1	2014 PR46 T1_50							Substrate	1	2014PR46T2_9			recently dead	1	2014PR46T2_17			recently dead
										Substrate	1	2014 PR46 T1_3			Substrate	1	2014 PR46 T1_11			Substrate	1	2014 PR46 T1_21								Turf algae	1	2014 PR46 T1_42							Substrate	1	2014PR46T2_9			Substrate	1	2014PR46T2_13			recently dead
										Substrate	1	2014 PR46 T1_7			Substrate	1	2014 PR46 T1_11			Substrate	1	2014 PR46 T1_21								Turf algae	1	2014 PR46 T1_42							Substrate	1	2014PR46T2_4			Substrate	1	2014PR46T2_13			recently dead
										Substrate	1	2014 PR46 T1_8			Substrate	1	2014 PR46 T1_11			Substrate	1	2014 PR46 T1_23								Turf algae	1	2014 PR46 T1_42							Substrate	1	2014PR46T2_4			Substrate	1	2014PR46T2_14			recently dead
										Substrate	1	2014 PR46 T1_8			Substrate	1	2014 PR46 T1_11			Substrate	1	2014 PR46 T1_23								Turf algae	1	2014 PR46 T1_43							Turf algae	1	2014PR46T2_10			Substrate	1	2014PR46T2_14			recently dead
										Substrate	1	2014 PR46 T1_8			Substrate	1	2014 PR46 T1_11			Substrate	1	2014 PR46 T1_23								Turf algae	1	2014 PR46 T1_43							Turf algae	1	2014PR46T2_2			Substrate	1	2014PR46T2_15			recently dead
										Substrate	1	2014 PR46 T1_5			Substrate	1	2014 PR46 T1_13			Substrate	1	2014 PR46 T1_23								Turf algae	1	2014 PR46 T1_43							Turf algae	1	2014PR46T2_7			Substrate	1	2014PR46T2_16			recently dead
										Substrate	1	2014 PR46 T1_5			Substrate	1	2014 PR46 T1_13			Substrate	1	2014 PR46 T1_23								Turf algae	1	2014 PR46 T1_43							Turf algae	1	2014PR46T2_8			Substrate	1	2014PR46T2_17			recently dead
										Substrate	1	2014 PR46 T1_5			Substrate	1	2014 PR46 T1_14			Substrate	1	2014 PR46 T1_26								Turf algae	1	2014 PR46 T1_44							Turf algae	1	2014PR46T2_8			Substrate	1	2014PR46T2_17			recently dead
										Turf algae	1	2014 PR46 T1_10			Substrate	1	2014 PR46 T1_14			Substrate	1	2014 PR46 T1_26								Turf algae	1	2014 PR46 T1_44							Turf algae	1	2014PR46T2_8			Substrate	1	2014PR46T2_17			Substrate
										Turf algae	1	2014 PR46 T1_3			Substrate	1	2014 PR46 T1_14			Substrate	1	2014 PR46 T1_26								Turf algae	1	2014 PR46 T1_44							Turf algae	1	2014PR46T2_8			Substrate	1	2014PR46T2_18			Substrate
										Turf algae	1	2014 PR46 T1_6			Substrate	1	2014 PR46 T1_14			Substrate	1	2014 PR46 T1_27								Turf algae	1	2014 PR46 T1_45							Turf algae	1	2014PR46T2_8			Substrate	1	2014PR46T2_18			Substrate
										Turf algae	1	2014 PR46 T1_7			Substrate	1	2014 PR46 T1_14			Substrate	1	2014 PR46 T1_28								Turf algae	1	2014 PR46 T1_45							Turf algae	1	2014PR46T2_8			Substrate	1	2014PR46T2_19			Substrate
										Turf algae	1	2014 PR46 T1_7			Substrate	1	2014 PR46 T1_14			Substrate	1	2014 PR46 T1_28								Turf algae	1	2014 PR46 T1_50							Turf algae	1	2014PR46T2_8			Substrate	1	2014PR46T2_19			Substrate
										Turf algae	1	2014 PR46 T1_5			Substrate	1	2014 PR46 T1_14			Substrate	1	2014 PR46 T1_28								Turf algae	1	2014 PR46 T1_50							Turf algae	1	2014PR46T2_8			Substrate	1	2014PR46T2_19			Substrate
															Substrate	1	2014 PR46 T1_15			Substrate	1	2014 PR46 T1_28																						Substrate	1	2014PR46T2_19			Substrate
															Substrate	1	2014 PR46 T1_16			Substrate	1	2014 PR46 T1_28																						Substrate	1	2014PR46T2_19			Substrate
															Substrate	1	2014 PR46 T1_16			Substrate	1	2014 PR46 T1_28																						Substrate	1	2014PR46T2_20			Substrate
															Substrate	1	2014 PR46 T1_17			Substrate	1	2014 PR46 T1_29																						Substrate	1	2014PR46T2_20			Substrate
															Substrate	1	2014 PR46 T1_17			Substrate	1	2014 PR46 T1_29																						Turf algae	1	2014PR46T2_11			Substrate
															Substrate	1	2014 PR46 T1_19			Substrate	1	2014 PR46 T1_30																						Turf algae	1	2014PR46T2_11			Substrate
															Substrate	1	2014 PR46 T1_20			Substrate	1	2014 PR46 T1_30																						Turf algae	1	2014PR46T2_15			Substrate
															Turf algae	1	2014 PR46 T1_11			Substrate	1	2014 PR46 T1_30																						Turf algae	1	2014PR46T2_16			Substrate
															Turf algae	1	2014 PR46 T1_11			Substrate	1	2014 PR46 T1_30																						Turf algae	1	2014PR46T2_16			Substrate
															Turf algae	1	2014 PR46 T1_12			Turf algae	1	2014 PR46 T1_21																						Turf algae	1	2014PR46T2_16			Substrate
															Turf algae	1	2014 PR46 T1_13			Turf algae	1	2014 PR46 T1_21																						Turf algae	1	2014PR46T2_16			Substrate
															Turf algae	1	2014 PR46 T1_13			Turf algae	1	2014 PR46 T1_21																						Turf algae	1	2014PR46T2_16			Substrate
															Turf algae	1	2014 PR46 T1_13			Turf algae	1	2014 PR46 T1_22																						Turf algae	1	2014PR46T2_17			Substrate
															Turf algae	1	2014 PR46 T1_13			Turf algae	1	2014 PR46 T1_23																						Turf algae	1	2014PR46T2_17			Substrate
															Turf algae	1	2014 PR46 T1_14			Turf algae	1	2014 PR46 T1_23																						Turf algae	1	2014PR46T2_17			Turf algae
															Turf algae	1	2014 PR46 T1_14			Turf algae	1	2014 PR46 T1_23																						Turf algae	1	2014PR46T2_17			Turf algae
															Turf algae	1	2014 PR46 T1_14			Turf algae	1	2014 PR46 T1_24																						Turf algae	1	2014PR46T2_18			Turf algae
															Turf algae	1	2014 PR46 T1_15			Turf algae	1	2014 PR46 T1_25																						Turf algae	1	2014PR46T2_18			Turf algae
															Turf algae	1	2014 PR46 T1_16			Turf algae	1	2014 PR46 T1_25																						Turf algae	1	2014PR46T2_18			Turf algae
															Turf algae	1	2014 PR46 T1_16			Turf algae	1	2014 PR46 T1_25																						Turf algae	1	2014PR46T2_18			Turf algae
															Turf algae	1	2014 PR46 T1_18			Turf algae	1	2014 PR46 T1_25																						Turf algae	1	2014PR46T2_18			Turf algae
															Turf algae	1	2014 PR46 T1_19			Turf algae	1	2014 PR46 T1_25																						Turf algae	1	2014PR46T2_18			Turf algae
															Turf algae	1	2014 PR46 T1_19			Turf algae	1	2014 PR46 T1_25																						Turf algae	1	2014PR46T2_18			Turf algae
															Turf algae	1	2014 PR46 T1_20			Turf algae	1	2014 PR46 T1_26																						Turf algae	1	2014PR46T2_18			Turf algae
															Turf algae	1	2014 PR46 T1_20			Turf algae	1	2014 PR46 T1_30																						Turf algae	1	2014PR46T2_18			Turf algae
[truncated: 172 more columns]

## Sheet: From point count
	Year = 2014					Year = 2015
Transect	Type	number of points	Total points	percentage	Transect	Type	number of points				Transect	total points	% live	% bleached	% dead
1	Live Coral	128	367	34.8774	1	Live Coral	320	320	100		1	367	34.88	61.04	4.09	352
1	bleached coral	224		61.0354	1	bleached coral	0		0		2	427	25.06	65.81	9.13	388
1	recently dead	15		4.08719	1	recently dead			0		3	226	0.44	49.56	50	187
2	Live Coral	107	427	25.0585	2	Live Coral	256	256	100		4	131	0	67.94	32.06	89
2	bleached coral	281		65.808	2	bleached coral	0		0		5	341	10.26	53.08	36.66	216
2	recently dead	39		9.13349	2	recently dead			0							1232	867	-0.296266
3	Live Coral	1	226	0.442478	3	Live Coral	84	84	100			total points	% live	% bleached	% dead
3	bleached coral	112		49.5575	3	bleached coral	0		0		1	320	100	0	0
3	recently dead	113		50	3	recently dead			0		2	256	100	0	0
4	Live Coral	0	131	0	4	Live Coral	77	77	100		3	84	100	0	0
4	bleached coral	89		67.9389	4	bleached coral	0		0		4	77	100	0	0
4	recently dead	42		32.0611	4	recently dead			0		5	130	100	0	0
5	Live Coral	35	341	10.2639	5	Live Coral	130	130	100
5	bleached coral	181		53.0792	5	bleached coral	0		0
5	recently dead	125		36.6569	5	recently dead			0
			%
	total average	1492		Average percentage	SE	SD	total	867			Matched Pairs
	live	271	18.1635	14.1285	6.9	15
	bleached	887	59.4504	59.4838	3.6	8					Column 3	246.4		t-Ratio	3.27252
	dead	334	22.3861	26.3877	8.6	19					Column 2	173.4		DF	4
											Mean Difference	73		Prob > |t|	0.0307
					percentage change						Std Error	22.3069		Prob > t	0.0154
POINTS					-41.8901						Upper 95%	134.934		Prob < t	0.9846
overall total coral declined by...											Lower 95%	11.066
22.4% +/- 8.6 (SE) of coral died from freshwater kill											N	5
additional loss of 29.6%											Correlation	0.91438
											percent change	-0.296266

[truncated: 1 more sheets: Benthic]
